# Supplementary material for: The annulation of N-hydroxyoximes and 1,3-diyne to synthesize alkynylated isoquinolines regioselectively catalyzed by ruthenium: a theoretical study
Source: Royal Society of Chemistry journal article supplement (doi:10.1039/d2ob01215d), 2022-01-01
Supplement: d2ob01215d1.pdf [file d2ob01215d1.pdf]

*Supporting Information*

**The annulation of N-hydroxyoximes and 1,3-diyne to synthesize alkynylated isoquinolines regioselectively catalyzed by ruthenium: a theoretical study**

Haibo Liu<sup>a</sup>, Hongpeng Shi<sup>b</sup>, Pengdong Han<sup>c</sup>, Zitong Meng<sup>a,b</sup>, Tao Liu<sup>a,b,\*</sup>, Lingli Han<sup>a,b,\*</sup>

<sup>a</sup> School of Chemistry and Chemical Engineering, Qufu Normal University, Qufu 273165, Shandong, China

<sup>b</sup> School of Chemistry, Chemical Engineering and Materials, Jining University, Qufu 273155, Shandong, China

<sup>c</sup> Weifang Institute of Educational Information, Weifang 261041, Shandong, China

\* *Correspondent author email addresses: liutao\_2005@126.com and hll\_2002@sina.com*

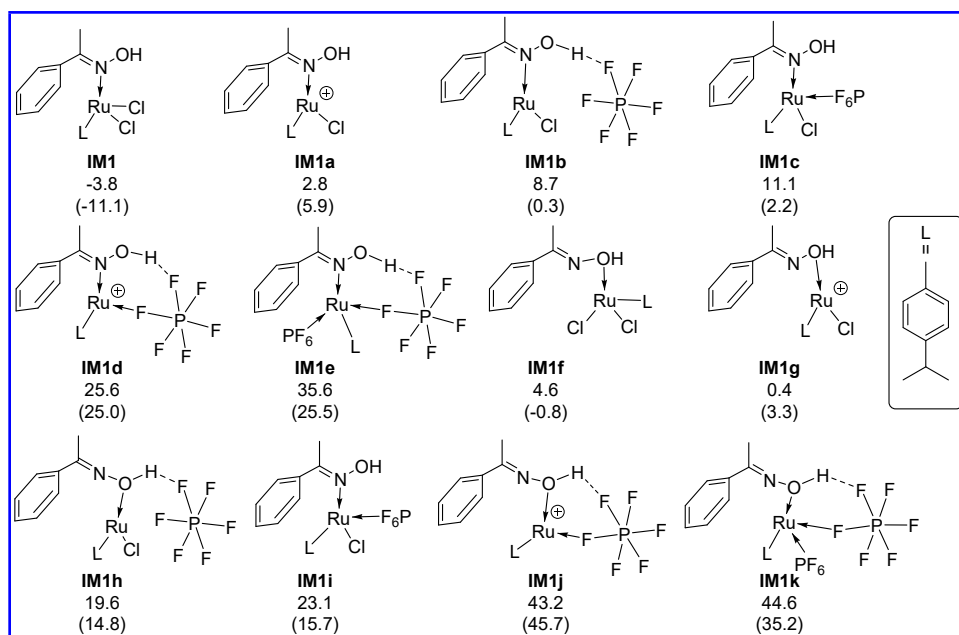

**Fig. S1.** Other unfavorable coordination isomers in reaction A. The relative free energies and relative enthalpic energies (in parentheses) are given in kcal/mol.

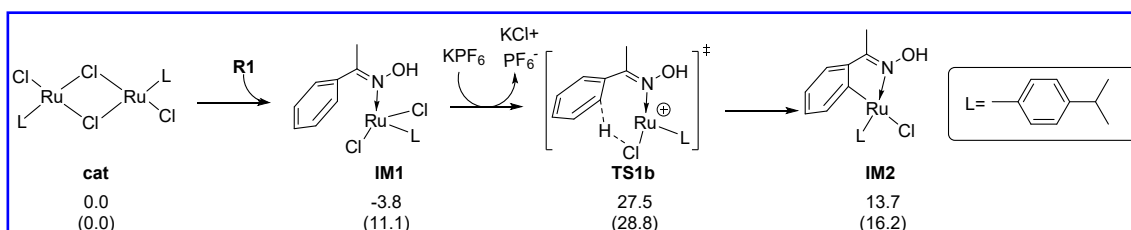

**Fig. S2.** The unfavorable inner-sphere CMD mechanism in reaction A. The relative free energies and relative enthalpic energies (in parentheses) are given in kcal/mol.

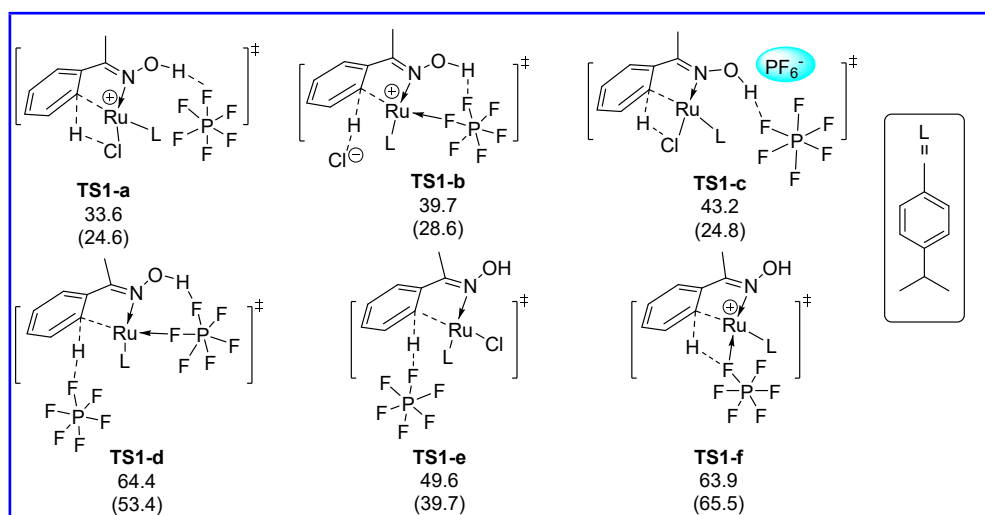

**Fig. S3.** Other inaccessible C-H activation transition states in reaction A. The relative free energies and relative enthalpic energies (in parentheses) are given in kcal/mol.

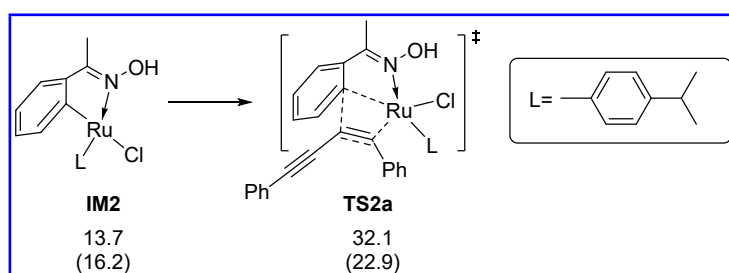

**Fig. S4.** The inaccessible insertion transition state without the assistant of  $KPF_6$  in reaction A. The relative free energies and relative enthalpic energies (in parentheses) are given in kcal/mol.

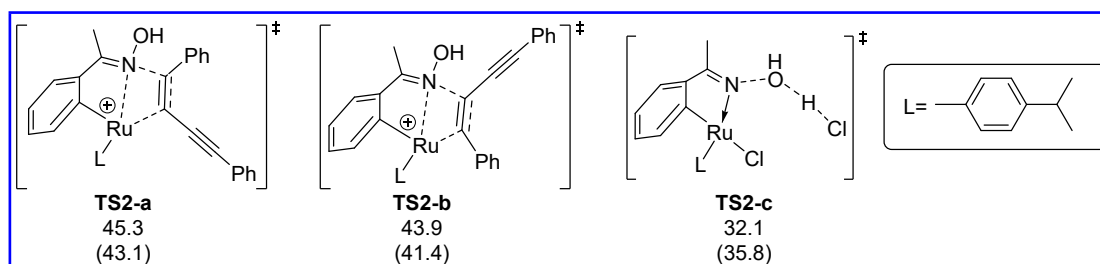

**Fig. S5.** The infeasible transition states of **R2** inserting into the Ru-N bond and the cleavage of N-O bond in reaction A. The relative free energies and relative enthalpic energies (in parentheses) are given in kcal/mol.

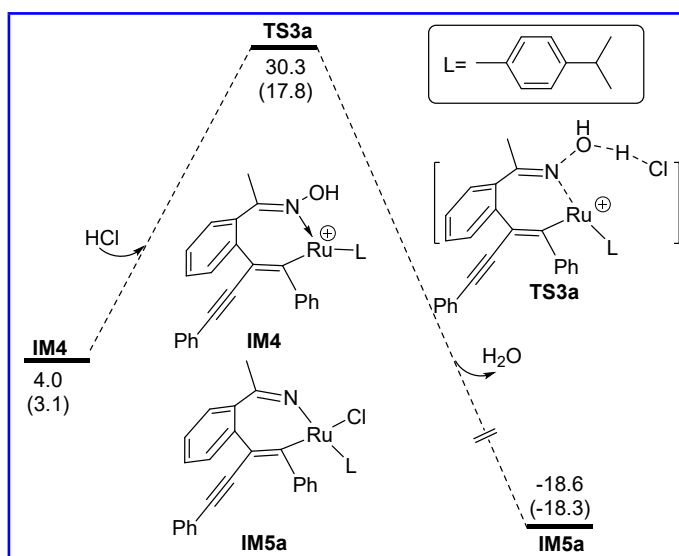

**Fig. S6.** The infeasible pathway that protodemetalation prior to reductive elimination in reaction A. The relative free energies and relative enthalpic energies (in parentheses) are given in kcal/mol.

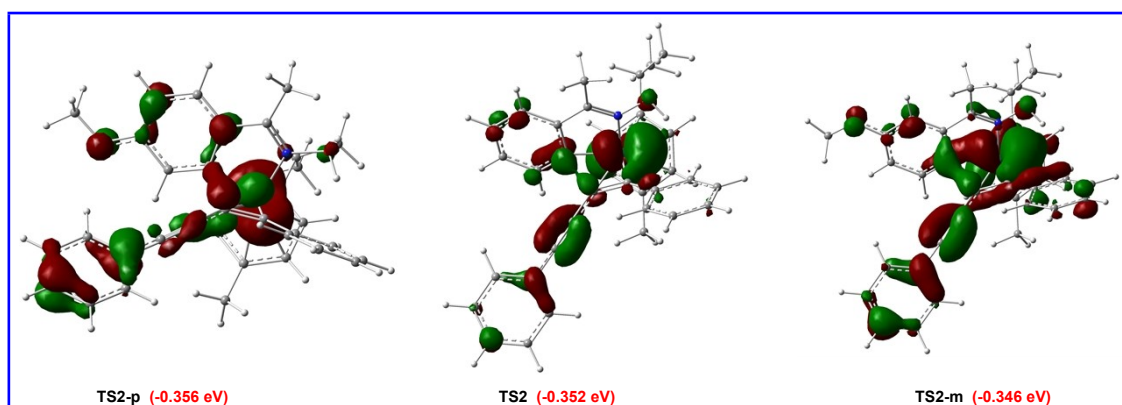

**Fig. S7.** The MO analysis of the transition states TS2-p, TS2, and TS2-m.

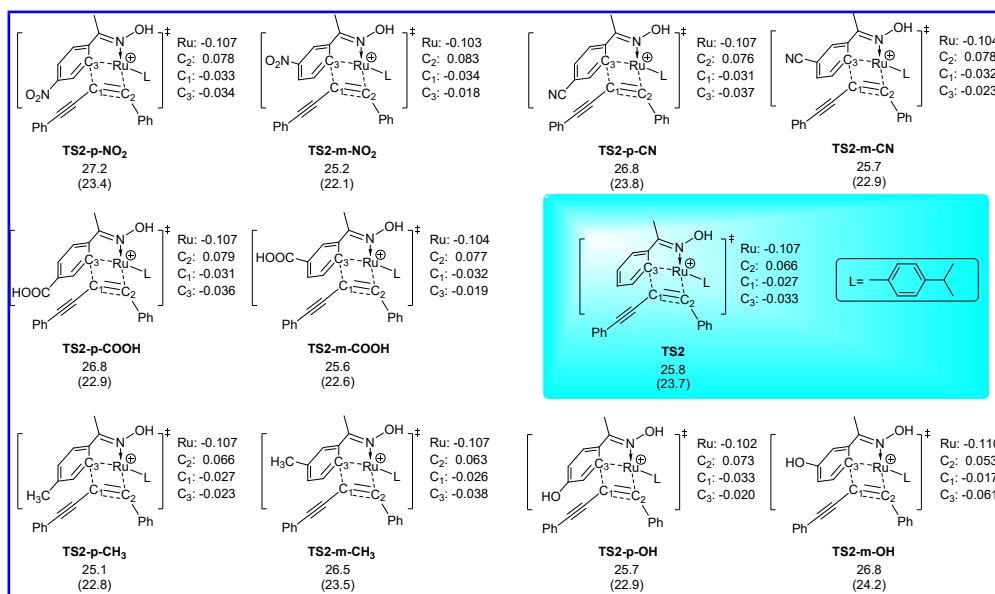

**Fig. S8.** NBO charges ( $e$ ) of the 1,3-diyne insertion transition states with different substituted groups. The relative free energies and relative enthalpic energies (in parentheses) are given in kcal/mol.

## Cartesian coordinates and sum of electronic and thermal free energies for all of the calculated structures

|                                               |              |          |          |                                               |              |          |          |
|-----------------------------------------------|--------------|----------|----------|-----------------------------------------------|--------------|----------|----------|
| <b>cat</b>                                    |              |          |          | H                                             | 5.05677      | -2.71925 | 1.40756  |
| Sum of electronic and thermal Free Energies = | -2807.400537 |          |          | H                                             | 3.62691      | -2.52115 | 2.43895  |
| Sum of electronic and thermal Enthalpies=     | -2807.303312 |          |          | H                                             | 3.46802      | -3.30708 | 0.85895  |
| Cl                                            | 0.99255      | -2.72729 | -0.55652 | C                                             | 2.79604      | 2.70344  | -1.17856 |
| Cl                                            | -0.13802     | -0.2145  | 1.49542  | C                                             | 3.83707      | 3.74556  | -0.71368 |
| Cl                                            | -0.72899     | 2.92789  | 0.36717  | C                                             | 2.71228      | 2.67327  | -2.70943 |
| Cl                                            | 0.03558      | 0.31485  | -1.74586 | H                                             | 4.84334      | 3.48383  | -1.06141 |
| C                                             | -3.21398     | -1.00907 | -0.18328 | H                                             | 3.58561      | 4.72925  | -1.12228 |
| C                                             | -3.18668     | -0.3054  | -1.41471 | H                                             | 3.86827      | 3.83457  | 0.37623  |
| C                                             | -3.48485     | 1.09231  | -1.50761 | H                                             | 2.42058      | 3.66215  | -3.07542 |
| C                                             | -3.782       | 1.84883  | -0.34677 | H                                             | 3.67922      | 2.43023  | -3.16726 |
| C                                             | -3.72638     | 1.17616  | 0.9179   | H                                             | 1.96335      | 1.9575   | -3.05586 |
| C                                             | -3.44043     | -0.21434 | 0.98636  | Ru                                            | -1.78938     | 0.78563  | -0.08819 |
| H                                             | -2.86927     | -0.82995 | -2.30967 | Ru                                            | 1.76934      | -0.46634 | -0.11772 |
| H                                             | -3.41328     | 1.59096  | -2.4674  | H                                             | -2.05128     | -2.6671  | -0.78623 |
| H                                             | -3.84154     | 1.74574  | 1.83279  | H                                             | 1.81332      | 3.00012  | -0.7913  |
| H                                             | -3.32328     | -0.66765 | 1.96319  | <b>1cat</b>                                   |              |          |          |
| C                                             | -2.93647     | -2.5051  | -0.15864 | Sum of electronic and thermal Free Energies = | -1403.695300 |          |          |
| C                                             | -4.12932     | -3.2581  | -0.78688 | Sum of electronic and thermal Enthalpies =    | -1403.633674 |          |          |
| C                                             | -2.61364     | -3.06105 | 1.23327  | Cl                                            | -0.86141     | 2.19276  | 1.07943  |
| H                                             | -5.03818     | -3.12615 | -0.18809 | Cl                                            | 0.04454      | -0.25211 | -0.99979 |
| H                                             | -4.34318     | -2.91322 | -1.80364 | C                                             | -3.38043     | -1.18314 | -0.41005 |
| H                                             | -3.9113      | -4.32952 | -0.83553 | C                                             | -3.33229     | -0.5116  | -1.65537 |
| H                                             | -2.36697     | -4.12317 | 1.14878  | C                                             | -3.52335     | 0.89877  | -1.73335 |
| H                                             | -1.75119     | -2.55542 | 1.67239  | C                                             | -3.93349     | 1.67706  | -0.5974  |
| H                                             | -3.46979     | -2.97793 | 1.91468  | C                                             | -4.03824     | 1.00211  | 0.64059  |
| C                                             | -4.05635     | 3.32355  | -0.41476 | C                                             | -3.68732     | -0.37368 | 0.74258  |
| H                                             | -5.10855     | 3.51517  | -0.17315 | H                                             | -2.98832     | -1.03063 | -2.53913 |
| H                                             | -3.42529     | 3.85938  | 0.29852  | H                                             | -3.34162     | 1.40165  | -2.67745 |
| H                                             | -3.8513      | 3.71808  | -1.41182 | H                                             | -4.22023     | 1.56973  | 1.54589  |
| C                                             | 3.23381      | -0.06534 | 1.48444  | H                                             | -3.64597     | -0.81769 | 1.72954  |
| C                                             | 3.70912      | -1.18364 | 0.75504  | C                                             | -3.10685     | -2.68515 | -0.25624 |
| C                                             | 3.82755      | -1.02641 | -0.66915 | C                                             | -2.10973     | -2.84139 | 0.9198   |
| C                                             | 3.52802      | 0.20406  | -1.29828 | C                                             | -4.39459     | -3.46987 | 0.06036  |
| C                                             | 3.11176      | 1.3578   | -0.54261 | H                                             | -1.16493     | -2.32454 | 0.72092  |
| C                                             | 2.94786      | 1.18815  | 0.85059  | H                                             | -2.52516     | -2.44272 | 1.8514   |
| H                                             | 3.01156      | -0.18137 | 2.53994  | H                                             | -1.88465     | -3.90134 | 1.0764   |
| H                                             | 4.06334      | -1.89146 | -1.27886 | H                                             | -5.13862     | -3.34678 | -0.7324  |
| H                                             | 3.55455      | 0.254    | -2.3793  | H                                             | -4.15679     | -4.53489 | 0.13878  |
| H                                             | 2.50627      | 1.98726  | 1.43532  | H                                             | -4.83806     | -3.16864 | 1.01549  |
| C                                             | 3.98045      | -2.51046 | 1.4055   | C                                             | -4.1515      | 3.15968  | -0.71021 |

|    |          |          |          |
|----|----------|----------|----------|
| H  | -5.20355 | 3.36715  | -0.94058 |
| H  | -3.89424 | 3.66536  | 0.22269  |
| H  | -3.53917 | 3.58596  | -1.50853 |
| Ru | -1.99804 | 0.60496  | -0.21778 |
| H  | -2.67799 | -3.09361 | -1.14738 |

**RI**

Sum of electronic and thermal Free Energies = -440.078615

Sum of electronic and thermal Enthalpies = -440.033529

|   |          |          |          |
|---|----------|----------|----------|
| C | -2.71775 | -0.7547  | 0.04497  |
| C | -1.32931 | -0.73799 | 0.12754  |
| C | -0.62084 | 0.47652  | 0.06496  |
| C | -1.34967 | 1.66714  | -0.08581 |
| C | -2.74286 | 1.64711  | -0.17046 |
| C | -3.43305 | 0.43775  | -0.10281 |
| H | -3.24645 | -1.702   | 0.10255  |
| H | -0.77176 | -1.6603  | 0.24436  |
| H | -0.83399 | 2.61954  | -0.15953 |
| H | -3.28589 | 2.57998  | -0.29245 |
| H | -4.51743 | 0.4222   | -0.16282 |
| C | 0.86398  | 0.48314  | 0.13763  |
| C | 1.60818  | 1.74137  | 0.53388  |
| H | 2.0678   | 2.23961  | -0.32924 |
| H | 0.94293  | 2.45619  | 1.01718  |
| H | 2.40271  | 1.51656  | 1.25677  |
| N | 1.44688  | -0.63156 | -0.15117 |
| O | 2.8253   | -0.67684 | -0.10504 |
| H | 3.13612  | -1.56871 | -0.34275 |

**IMI**

Sum of electronic and thermal Free Energies = -1843.779007

Sum of electronic and thermal Enthalpies = -1843.697032

|   |          |          |          |
|---|----------|----------|----------|
| C | -1.40247 | -1.78844 | -0.61228 |
| C | -1.51281 | -1.2951  | 0.68755  |
| C | -2.44894 | -0.29082 | 0.99218  |
| C | -3.31078 | 0.17459  | -0.01234 |
| C | -3.20596 | -0.33798 | -1.30801 |
| C | -2.24883 | -1.30724 | -1.61519 |
| H | -0.66593 | -2.55388 | -0.83873 |
| H | -0.86477 | -1.68397 | 1.4689   |
| H | -4.07108 | 0.9075   | 0.22893  |
| H | -3.88896 | 0.01525  | -2.07531 |
| H | -2.17373 | -1.7004  | -2.62489 |
| C | -2.55673 | 0.18673  | 2.39549  |
| C | -2.86152 | -0.81595 | 3.47883  |
| H | -2.97256 | -1.81574 | 3.05976  |

|    |          |          |          |
|----|----------|----------|----------|
| H  | -2.0809  | -0.81574 | 4.24655  |
| H  | -3.78916 | -0.5247  | 3.98245  |
| N  | -2.40576 | 1.43569  | 2.70574  |
| O  | -2.54238 | 1.64746  | 4.05963  |
| H  | -2.63383 | 2.63075  | 4.13961  |
| Cl | -2.38829 | 4.51942  | 3.51703  |
| C  | -1.31261 | 2.96736  | -0.64968 |
| C  | -0.44317 | 2.18319  | 0.13061  |
| C  | 0.26451  | 2.74507  | 1.2475   |
| C  | 0.07866  | 4.12674  | 1.49971  |
| C  | -0.76416 | 4.93443  | 0.66815  |
| C  | -1.4905  | 4.3788   | -0.40709 |
| H  | -1.9096  | 2.47194  | -1.40224 |
| H  | -0.38302 | 1.11793  | -0.05612 |
| H  | 0.52052  | 4.57212  | 2.38369  |
| H  | -0.93012 | 5.9632   | 0.95777  |
| C  | 1.15747  | 1.89805  | 2.11137  |
| Ru | -1.9017  | 3.20043  | 1.52263  |
| C  | -2.41519 | 5.24701  | -1.27364 |
| C  | -3.23643 | 6.23536  | -0.41546 |
| C  | -1.48744 | 6.03493  | -2.23516 |
| H  | -3.88971 | 5.71033  | 0.28341  |
| H  | -2.606   | 6.93021  | 0.14768  |
| H  | -3.86312 | 6.83979  | -1.07825 |
| H  | -0.88951 | 5.36349  | -2.86135 |
| H  | -2.09512 | 6.65989  | -2.89726 |
| H  | -0.80241 | 6.69131  | -1.68827 |
| H  | 1.23078  | 2.30484  | 3.12252  |
| H  | 0.78673  | 0.8725   | 2.17562  |
| H  | 2.1663   | 1.86504  | 1.68256  |
| Cl | -4.01085 | 3.17017  | 0.97487  |
| H  | -3.09817 | 4.6581   | -1.84951 |

**KPF<sub>6</sub>**

Sum of electronic and thermal Free Energies = -1540.551810

Sum of electronic and thermal Enthalpies = -1540.509289

|   |          |          |          |
|---|----------|----------|----------|
| P | 0.6351   | -0.66198 | 0.03712  |
| F | 0.63694  | 0.94256  | -0.04196 |
| F | -1.03573 | -0.65878 | 0.15149  |
| F | 0.52948  | -0.82357 | -1.55782 |
| F | 2.23922  | -0.74776 | 0.0235   |
| F | 0.64982  | -0.58377 | 1.71039  |
| F | 0.54432  | -2.32502 | 0.21477  |
| K | -1.20027 | -2.32883 | 2.10664  |

**KCl**

Sum of electronic and thermal Free Energies = -1060.189060

Sum of electronic and thermal Enthalpies = -1060.161894

|    |          |         |   |
|----|----------|---------|---|
| K  | -0.74277 | 0.33708 | 0 |
| Cl | -3.53192 | 0.33708 | 0 |

### IM1a

Sum of electronic and thermal Free Energies = -1383.328957

Sum of electronic and thermal Enthalpies = -1383.249231

|    |          |          |          |
|----|----------|----------|----------|
| C  | -2.84822 | -2.63949 | 2.14156  |
| C  | -1.67938 | -1.88113 | 2.23415  |
| C  | -1.69552 | -0.50809 | 1.91907  |
| C  | -2.90207 | 0.09228  | 1.5218   |
| C  | -4.05758 | -0.67411 | 1.41367  |
| C  | -4.03488 | -2.03923 | 1.72453  |
| H  | -2.83622 | -3.68829 | 2.42158  |
| H  | -0.77494 | -2.32506 | 2.63773  |
| H  | -2.92886 | 1.14404  | 1.2564   |
| H  | -4.98186 | -0.20879 | 1.08703  |
| H  | -4.94598 | -2.6249  | 1.65754  |
| C  | -0.4536  | 0.27667  | 2.0265   |
| C  | -0.43791 | 1.62515  | 2.68893  |
| H  | -1.44106 | 2.05108  | 2.70377  |
| H  | -0.1223  | 1.54195  | 3.73816  |
| H  | 0.24367  | 2.3077   | 2.17398  |
| N  | 0.63043  | -0.27171 | 1.56543  |
| O  | 1.83679  | 0.39832  | 1.7975   |
| H  | 1.8205   | 0.7273   | 2.71435  |
| Ru | 0.80046  | -1.92593 | 0.23593  |
| Cl | -0.51651 | -0.71213 | -1.27355 |
| C  | 1.01339  | -3.95331 | -0.71028 |
| C  | 1.14945  | -4.11742 | 0.71176  |
| C  | 2.15046  | -3.36759 | 1.38692  |
| C  | 2.92706  | -2.41287 | 0.68428  |
| C  | 2.77497  | -2.21131 | -0.72669 |
| C  | 1.81588  | -3.03783 | -1.40986 |
| H  | 0.22056  | -4.47884 | -1.23213 |
| H  | 2.25139  | -3.45556 | 2.46337  |
| H  | 3.58867  | -1.76057 | 1.24106  |
| H  | 1.62324  | -2.85777 | -2.46223 |
| C  | 3.63038  | -1.24949 | -1.52998 |
| C  | 4.78021  | -2.06057 | -2.17748 |
| C  | 4.17699  | -0.0554  | -0.73442 |
| H  | 5.46348  | -2.44875 | -1.41336 |
| H  | 4.41237  | -2.90691 | -2.76803 |
| H  | 5.35376  | -1.40921 | -2.8428  |

|   |         |          |          |
|---|---------|----------|----------|
| H | 4.69189 | 0.62617  | -1.41631 |
| H | 3.38116 | 0.50191  | -0.23321 |
| H | 4.91164 | -0.36825 | 0.01796  |
| C | 0.262   | -5.08477 | 1.44369  |
| H | 0.66862 | -6.09793 | 1.33406  |
| H | 0.21051 | -4.86141 | 2.51173  |
| H | -0.7495 | -5.08996 | 1.02925  |
| H | 2.9916  | -0.86394 | -2.33483 |

### TS1

Sum of electronic and thermal Free Energies = -1843.728635

Sum of electronic and thermal Enthalpies = -1843.647540

Imaginary frequency= -268.8373

|    |          |          |          |
|----|----------|----------|----------|
| C  | -2.19154 | 0.2729   | 4.50495  |
| C  | -2.21986 | 0.26763  | 5.89812  |
| C  | -1.01977 | 0.17295  | 6.60854  |
| C  | 0.23975  | 0.14209  | 5.93399  |
| C  | 0.22     | 0.12646  | 4.52045  |
| C  | -0.97437 | 0.18955  | 3.81437  |
| H  | -3.12318 | 0.33729  | 3.95034  |
| H  | -3.17208 | 0.3033   | 6.41767  |
| H  | 1.16144  | 0.12806  | 3.97884  |
| H  | -0.96858 | 0.1976   | 2.72835  |
| C  | -0.96864 | 0.02583  | 8.05737  |
| C  | -2.12221 | 0.33778  | 8.96046  |
| H  | -2.98524 | -0.27771 | 8.68303  |
| H  | -1.87435 | 0.14434  | 10.00196 |
| H  | -2.41054 | 1.38789  | 8.84629  |
| N  | 0.17026  | -0.44901 | 8.47107  |
| O  | 0.28316  | -0.62104 | 9.85078  |
| H  | 0.89592  | -1.36887 | 9.92202  |
| Cl | 1.53415  | 2.74466  | 6.61884  |
| C  | 3.30843  | -2.51642 | 7.74836  |
| C  | 3.38278  | -2.36532 | 6.31928  |
| C  | 3.5042   | -1.06196 | 5.80822  |
| C  | 3.55841  | 0.07048  | 6.68034  |
| C  | 3.57311  | -0.07424 | 8.09077  |
| C  | 3.42347  | -1.40428 | 8.60398  |
| H  | 3.1342   | -3.50241 | 8.16382  |
| H  | 3.49748  | -0.90727 | 4.73493  |
| H  | 3.54732  | 1.07205  | 6.26236  |
| H  | 3.37218  | -1.55983 | 9.67635  |
| C  | 3.77873  | 1.15056  | 8.96791  |
| Ru | 1.64796  | -1.05221 | 7.16572  |
| C  | 3.2862   | -3.57045 | 5.4282   |



|    |         |          |          |
|----|---------|----------|----------|
| H  | 3.16001 | 1.94184  | 8.52638  |
| H  | 0.96462 | 1.08692  | 6.34307  |
| Cl | 0.12785 | -2.9191  | 6.70813  |
| H  | 3.12323 | -3.28127 | 4.38682  |
| H  | 2.4547  | -4.20959 | 5.74086  |
| H  | 4.21794 | -4.14757 | 5.4847   |
| C  | 3.35701 | 0.9634   | 10.43092 |
| H  | 3.98922 | 0.23415  | 10.95407 |
| H  | 3.46161 | 1.91389  | 10.9622  |
| H  | 2.31249 | 0.65125  | 10.51444 |
| C  | 5.25646 | 1.5932   | 8.87673  |
| H  | 5.54797 | 1.81107  | 7.84473  |
| H  | 5.41054 | 2.5022   | 9.46653  |
| H  | 5.93065 | 0.82021  | 9.26575  |

**TS1'**

Sum of electronic and thermal Free Energies = -1843.733492

Sum of electronic and thermal Enthalpies = -1843.647298

Imaginary frequency= -379.3650

|    |          |          |          |
|----|----------|----------|----------|
| C  | -2.47502 | -3.82563 | -1.92175 |
| C  | -1.88033 | -2.58791 | -2.21082 |
| C  | -1.20404 | -2.45476 | -3.46205 |
| C  | -1.11583 | -3.5283  | -4.35544 |
| C  | -1.71333 | -4.74704 | -4.03574 |
| C  | -2.39513 | -4.89013 | -2.82471 |
| H  | -2.99857 | -3.96808 | -0.98203 |
| H  | -0.80482 | -2.33831 | -1.08934 |
| H  | -0.59354 | -3.41273 | -5.30074 |
| H  | -1.64756 | -5.58131 | -4.72736 |
| H  | -2.86613 | -5.83794 | -2.57844 |
| C  | -0.69874 | -1.11486 | -3.7536  |
| C  | 0.00553  | -0.7306  | -5.0167  |
| H  | -0.56811 | -1.06885 | -5.88506 |
| H  | 0.98972  | -1.21051 | -5.06267 |
| H  | 0.13775  | 0.3486   | -5.07051 |
| N  | -0.97907 | -0.28042 | -2.79722 |
| O  | -0.63982 | 1.05724  | -2.97819 |
| H  | -1.47664 | 1.50341  | -2.74422 |
| Ru | -1.96402 | -0.83283 | -1.14145 |
| Cl | 0.23978  | -1.94462 | -0.1469  |
| C  | -2.55308 | -0.66618 | 1.33786  |
| C  | -2.98015 | 0.66491  | 1.55275  |
| C  | -4.32382 | 0.95405  | 1.31097  |
| C  | -5.21621 | -0.02811 | 0.86775  |
| C  | -4.8034  | -1.34013 | 0.64104  |

|    |          |          |          |
|----|----------|----------|----------|
| C  | -3.44984 | -1.6537  | 0.88534  |
| H  | -1.55807 | -0.95805 | 1.65718  |
| H  | -4.69574 | 1.96238  | 1.47211  |
| H  | -6.25335 | 0.2407   | 0.68703  |
| H  | -3.12471 | -2.68911 | 0.85614  |
| C  | -5.75473 | -2.37985 | 0.11116  |
| C  | -2.00553 | 1.71467  | 2.07088  |
| H  | -1.05016 | 1.20455  | 2.24947  |
| Cl | -3.82425 | 0.1703   | -2.22452 |
| H  | -5.68409 | -2.42324 | -0.98265 |
| H  | -5.52494 | -3.3771  | 0.50027  |
| H  | -6.79141 | -2.14336 | 0.36693  |
| C  | -1.74894 | 2.82142  | 1.02996  |
| H  | -2.67326 | 3.35434  | 0.7816   |
| H  | -1.03102 | 3.55413  | 1.41435  |
| H  | -1.34238 | 2.40572  | 0.10195  |
| C  | -2.46691 | 2.31607  | 3.41213  |
| H  | -2.63256 | 1.53638  | 4.16207  |
| H  | -1.7133  | 3.00897  | 3.80143  |
| H  | -3.40201 | 2.87554  | 3.29893  |

**IM2**

Sum of electronic and thermal Free Energies = -1382.955164

Sum of electronic and thermal Enthalpies = -1382.878652

|    |          |          |         |
|----|----------|----------|---------|
| C  | -3.00187 | -3.65149 | 2.44454 |
| C  | -2.30964 | -2.43718 | 2.55624 |
| C  | -1.47434 | -2.2743  | 3.69511 |
| C  | -1.37928 | -3.25862 | 4.69178 |
| C  | -2.10697 | -4.43747 | 4.5671  |
| C  | -2.90795 | -4.63232 | 3.43616 |
| H  | -3.61618 | -3.84967 | 1.57072 |
| H  | -0.73359 | -3.10704 | 5.55293 |
| H  | -2.04226 | -5.20468 | 5.33277 |
| H  | -3.46205 | -5.56136 | 3.32375 |
| C  | -0.67205 | -1.05882 | 3.68685 |
| C  | 0.43685  | -0.77184 | 4.65166 |
| H  | 0.03554  | -0.64167 | 5.66304 |
| H  | 1.13066  | -1.61783 | 4.68124 |
| H  | 0.977    | 0.12865  | 4.36484 |
| N  | -0.98499 | -0.28193 | 2.69332 |
| O  | -0.18737 | 0.84915  | 2.48263 |
| H  | 0.04143  | 0.74112  | 1.53889 |
| Ru | -2.39232 | -0.82528 | 1.30017 |
| Cl | -0.37595 | -1.53701 | 0.09357 |
| C  | -4.44499 | -1.30625 | 0.3989  |

|   |          |          |          |
|---|----------|----------|----------|
| C | -3.67553 | -0.79366 | -0.6593  |
| C | -3.15741 | 0.5493   | -0.53786 |
| C | -3.33673 | 1.29031  | 0.62502  |
| C | -4.0002  | 0.71743  | 1.76854  |
| C | -4.57769 | -0.57324 | 1.62006  |
| H | -4.87069 | -2.30005 | 0.32072  |
| H | -2.56234 | 0.95343  | -1.34979 |
| H | -2.89774 | 2.27807  | 0.7      |
| H | -5.11351 | -1.01829 | 2.4515   |
| C | -4.22847 | 1.49945  | 3.05578  |
| C | -5.6565  | 2.08566  | 3.06665  |
| C | -3.18968 | 2.60169  | 3.31212  |
| H | -5.79258 | 2.79615  | 2.24326  |
| H | -6.41569 | 1.30405  | 2.96422  |
| H | -5.84311 | 2.61931  | 4.0045   |
| H | -3.32102 | 3.00559  | 4.32075  |
| H | -2.1663  | 2.23015  | 3.21933  |
| H | -3.31461 | 3.43903  | 2.61552  |
| C | -3.40827 | -1.58477 | -1.91064 |
| H | -3.83911 | -1.08023 | -2.78343 |
| H | -2.32928 | -1.68471 | -2.06505 |
| H | -3.83852 | -2.5871  | -1.84556 |
| H | -4.1586  | 0.77281  | 3.87538  |

### IM2'

Sum of electronic and thermal Free Energies = -922.504724

Sum of electronic and thermal Enthalpies = -922.430861

|   |          |          |         |
|---|----------|----------|---------|
| C | -3.27675 | -3.55325 | 2.74132 |
| C | -2.4595  | -2.42083 | 2.73286 |
| C | -1.35288 | -2.39141 | 3.62609 |
| C | -1.09023 | -3.45903 | 4.4867  |
| C | -1.92793 | -4.58127 | 4.47666 |
| C | -3.01204 | -4.62918 | 3.60558 |
| H | -4.13359 | -3.62361 | 2.07764 |
| H | -0.24303 | -3.43175 | 5.16473 |
| H | -1.72805 | -5.40956 | 5.1485  |
| H | -3.66375 | -5.49787 | 3.59736 |
| C | -0.51912 | -1.18107 | 3.57558 |
| C | 0.6681   | -0.94051 | 4.45037 |
| H | 0.33501  | -0.62079 | 5.44542 |
| H | 1.24272  | -1.86079 | 4.57519 |
| H | 1.30943  | -0.16198 | 4.04006 |
| N | -0.943   | -0.31724 | 2.69856 |
| O | -0.24255 | 0.88823  | 2.65813 |
| H | -0.49089 | 1.27547  | 1.80606 |

|    |          |          |          |
|----|----------|----------|----------|
| Ru | -2.56259 | -0.81884 | 1.46213  |
| C  | -4.48851 | -1.26486 | 0.37536  |
| C  | -3.5616  | -0.80043 | -0.59159 |
| C  | -3.0232  | 0.52855  | -0.45628 |
| C  | -3.30068 | 1.29879  | 0.67262  |
| C  | -4.08902 | 0.76759  | 1.75205  |
| C  | -4.71722 | -0.50889 | 1.55291  |
| H  | -4.93565 | -2.24552 | 0.2616   |
| H  | -2.34623 | 0.90167  | -1.21769 |
| H  | -2.84235 | 2.27543  | 0.78073  |
| H  | -5.34343 | -0.91474 | 2.34016  |
| C  | -4.41216 | 1.56927  | 3.0016   |
| C  | -5.76829 | 2.2837   | 2.79658  |
| C  | -3.32238 | 2.56781  | 3.41606  |
| H  | -5.70903 | 3.0158   | 1.98422  |
| H  | -6.5713  | 1.5788   | 2.56137  |
| H  | -6.04581 | 2.81779  | 3.70972  |
| H  | -3.5731  | 2.99697  | 4.38976  |
| H  | -2.33977 | 2.096    | 3.49972  |
| H  | -3.24905 | 3.40528  | 2.71294  |
| C  | -3.19744 | -1.64008 | -1.78514 |
| H  | -3.81193 | -1.34057 | -2.64321 |
| H  | -2.15011 | -1.50207 | -2.06637 |
| H  | -3.37324 | -2.70163 | -1.59959 |
| H  | -4.53496 | 0.84154  | 3.81337  |

### R2

Sum of electronic and thermal Free Energies = -615.463273

Sum of electronic and thermal Enthalpies = -615.406945

|   |           |          |         |
|---|-----------|----------|---------|
| C | -7.09332  | 0.14581  | 0.22718 |
| C | -8.59324  | 0.13194  | 0.2199  |
| C | -9.31943  | 1.33973  | 0.25841 |
| C | -9.29664  | -1.08897 | 0.17477 |
| C | -10.71155 | 1.32121  | 0.25148 |
| H | -8.78073  | 2.28059  | 0.29341 |
| C | -10.68892 | -1.0961  | 0.16845 |
| H | -8.74046  | -2.01979 | 0.14504 |
| C | -11.40005 | 0.10608  | 0.20663 |
| H | -11.26137 | 2.25699  | 0.28138 |
| H | -11.22102 | -2.04189 | 0.13337 |
| H | -12.48579 | 0.09613  | 0.20146 |
| C | -5.87178  | 0.15682  | 0.23315 |
| C | -4.36185  | 0.14271  | 0.2309  |
| C | -3.1403   | 0.13192  | 0.22917 |
| C | -1.63036  | 0.12157  | 0.22168 |

|   |          |          |         |
|---|----------|----------|---------|
| C | -0.90725 | 1.3318   | 0.21419 |
| C | -0.92384 | -1.09838 | 0.22253 |
| C | 0.48492  | 1.31658  | 0.20765 |
| H | -1.44835 | 2.27193  | 0.21388 |
| C | 0.46845  | -1.10219 | 0.21579 |
| H | -1.47763 | -2.03107 | 0.2282  |
| C | 1.17651  | 0.10239  | 0.20835 |
| H | 1.03234  | 2.25423  | 0.20214 |
| H | 1.00297  | -2.04726 | 0.2163  |
| H | 2.26227  | 0.09503  | 0.20318 |

**IM3**

Sum of electronic and thermal Free Energies = -1537.987367

Sum of electronic and thermal Enthalpies = -1537.879748

|    |          |          |          |
|----|----------|----------|----------|
| C  | -2.96212 | 0.35324  | 4.93246  |
| C  | -2.53419 | -0.29025 | 3.76805  |
| C  | -1.15182 | -0.56484 | 3.62983  |
| C  | -0.23065 | -0.1869  | 4.62142  |
| C  | -0.67709 | 0.47219  | 5.76153  |
| C  | -2.04122 | 0.74049  | 5.91255  |
| H  | -4.01653 | 0.54694  | 5.10133  |
| H  | 0.82637  | -0.40259 | 4.49882  |
| H  | 0.02851  | 0.77282  | 6.52909  |
| H  | -2.39418 | 1.25419  | 6.8029   |
| C  | -0.77608 | -1.2449  | 2.40065  |
| C  | 0.62433  | -1.63617 | 2.04666  |
| H  | 1.20389  | -0.74758 | 1.77083  |
| H  | 1.11493  | -2.09181 | 2.91064  |
| H  | 0.63799  | -2.32968 | 1.20807  |
| N  | -1.8012  | -1.46104 | 1.62567  |
| O  | -1.52236 | -2.01363 | 0.37703  |
| H  | -2.17023 | -2.73756 | 0.27603  |
| Ru | -3.69743 | -0.80807 | 2.13978  |
| C  | -4.47072 | -0.00307 | -0.03693 |
| C  | -3.77283 | 1.08411  | 0.58354  |
| C  | -4.22311 | 1.49349  | 1.85481  |
| C  | -5.30417 | 0.84083  | 2.50755  |
| C  | -6.01648 | -0.20432 | 1.87105  |
| C  | -5.58581 | -0.59658 | 0.57038  |
| H  | -4.14536 | -0.35689 | -1.00807 |
| H  | -3.70495 | 2.29564  | 2.37005  |
| H  | -5.60903 | 1.1697   | 3.49446  |
| H  | -6.10894 | -1.40109 | 0.06335  |
| C  | -7.21156 | -0.85061 | 2.51716  |
| C  | -4.03799 | -2.92822 | 2.38777  |

|   |          |          |          |
|---|----------|----------|----------|
| C | -3.82023 | -4.09011 | 1.55826  |
| C | -3.97313 | -4.05376 | 0.15617  |
| C | -3.44705 | -5.30805 | 2.16731  |
| C | -3.75635 | -5.19886 | -0.61209 |
| H | -4.29864 | -3.13491 | -0.32279 |
| C | -3.23773 | -6.44527 | 1.39373  |
| H | -3.32499 | -5.34428 | 3.24489  |
| C | -3.38589 | -6.39531 | 0.00355  |
| H | -3.88538 | -5.15717 | -1.68925 |
| H | -2.9524  | -7.37524 | 1.87584  |
| H | -3.21611 | -7.28512 | -0.5942  |
| C | -4.28747 | -2.43756 | 3.53479  |
| C | -4.71873 | -2.40972 | 4.83156  |
| C | -5.11322 | -2.36741 | 5.98832  |
| C | -5.56179 | -2.33881 | 7.33641  |
| C | -4.85811 | -1.58821 | 8.30188  |
| C | -6.71076 | -3.05996 | 7.7236   |
| C | -5.29994 | -1.56123 | 9.62082  |
| H | -3.96931 | -1.04154 | 8.00375  |
| C | -7.14208 | -3.02487 | 9.04597  |
| H | -7.24999 | -3.64107 | 6.98263  |
| C | -6.44065 | -2.27682 | 9.9957   |
| H | -4.75312 | -0.98392 | 10.3599  |
| H | -8.02631 | -3.58282 | 9.33798  |
| H | -6.78095 | -2.25351 | 11.0263  |
| C | -2.65409 | 1.85069  | -0.10981 |
| C | -1.9624  | 1.07764  | -1.24133 |
| C | -3.21015 | 3.19717  | -0.62809 |
| H | -1.6135  | 0.09368  | -0.91792 |
| H | -2.62729 | 0.94519  | -2.1025  |
| H | -1.0984  | 1.64708  | -1.59445 |
| H | -3.64626 | 3.7974   | 0.176    |
| H | -2.40539 | 3.78004  | -1.0852  |
| H | -3.98197 | 3.03594  | -1.3883  |
| H | -7.27024 | -1.91283 | 2.26809  |
| H | -7.1787  | -0.75379 | 3.6042   |
| H | -8.13032 | -0.37066 | 2.15999  |
| H | -1.90486 | 2.07532  | 0.6600   |

**IM3'**

Sum of electronic and thermal Free Energies = -1537.986481

Sum of electronic and thermal Enthalpies = -1537.877867

|   |          |          |         |
|---|----------|----------|---------|
| C | -0.64068 | -4.9411  | 4.71197 |
| C | -1.94522 | -4.62416 | 4.32246 |
| C | -2.98796 | -4.82337 | 5.2613  |

|    |          |          |          |
|----|----------|----------|----------|
| C  | -2.72473 | -5.33336 | 6.5439   |
| C  | -1.41981 | -5.65831 | 6.90225  |
| C  | -0.38292 | -5.4635  | 5.98471  |
| H  | 0.19342  | -4.76986 | 4.03857  |
| H  | -3.53402 | -5.48115 | 7.25256  |
| H  | -1.20952 | -6.05802 | 7.88891  |
| H  | 0.6378   | -5.70998 | 6.26379  |
| C  | -4.31972 | -4.47332 | 4.78838  |
| C  | -5.56757 | -4.58568 | 5.60647  |
| H  | -5.86092 | -5.63739 | 5.70445  |
| H  | -5.39205 | -4.1991  | 6.61373  |
| H  | -6.38878 | -4.04197 | 5.14285  |
| N  | -4.30634 | -4.06388 | 3.55205  |
| O  | -5.54094 | -3.79197 | 2.97182  |
| H  | -5.40065 | -2.95212 | 2.49086  |
| Ru | -2.56017 | -3.99962 | 2.45513  |
| C  | -3.41373 | -4.94131 | 0.3933   |
| C  | -2.91069 | -6.03111 | 1.17639  |
| C  | -1.55992 | -5.95767 | 1.57957  |
| C  | -0.73258 | -4.8548  | 1.23896  |
| C  | -1.22944 | -3.80195 | 0.43578  |
| C  | -2.5861  | -3.88003 | 0.00278  |
| H  | -4.4532  | -4.94168 | 0.08747  |
| H  | -1.15278 | -6.74524 | 2.2054   |
| H  | 0.29618  | -4.82908 | 1.58069  |
| H  | -2.99719 | -3.07269 | -0.59458 |
| C  | -0.34983 | -2.66203 | 0.00204  |
| C  | -3.73562 | -7.26971 | 1.49825  |
| H  | -3.46242 | -7.5707  | 2.51754  |
| C  | -5.07475 | -0.66264 | 1.59989  |
| C  | -6.23292 | 0.0106   | 1.12048  |
| C  | -6.69441 | -0.19999 | -0.19571 |
| C  | -6.93069 | 0.90015  | 1.96516  |
| C  | -7.82838 | 0.46458  | -0.65147 |
| H  | -6.15572 | -0.87918 | -0.84884 |
| C  | -8.06299 | 1.55917  | 1.49759  |
| H  | -6.57315 | 1.06512  | 2.97618  |
| C  | -8.51395 | 1.34318  | 0.19224  |
| H  | -8.17799 | 0.30008  | -1.66583 |
| H  | -8.59474 | 2.24376  | 2.15081  |
| H  | -9.39781 | 1.86048  | -0.16789 |
| C  | -4.07268 | -1.20235 | 2.0535   |
| C  | -2.96759 | -1.8472  | 2.55019  |
| C  | -1.90253 | -2.01046 | 3.21812  |

|   |          |          |          |
|---|----------|----------|----------|
| C | -0.75606 | -1.47734 | 3.92     |
| C | 0.13284  | -0.63234 | 3.22337  |
| C | -0.53245 | -1.72819 | 5.28656  |
| C | 1.22135  | -0.06304 | 3.87871  |
| H | -0.04729 | -0.41546 | 2.17562  |
| C | 0.55534  | -1.14648 | 5.93431  |
| H | -1.21918 | -2.35997 | 5.83586  |
| C | 1.43747  | -0.32029 | 5.23482  |
| H | 1.89611  | 0.58886  | 3.33236  |
| H | 0.71201  | -1.33766 | 6.99146  |
| H | 2.28456  | 0.12756  | 5.7451   |
| H | 0.05552  | -2.86764 | -0.99575 |
| H | -0.91225 | -1.72678 | -0.05545 |
| H | 0.49108  | -2.52401 | 0.68459  |
| C | -5.25427 | -7.04773 | 1.45342  |
| H | -5.60722 | -6.88695 | 0.42848  |
| H | -5.76335 | -7.94072 | 1.82615  |
| H | -5.57008 | -6.1961  | 2.06151  |
| C | -3.32281 | -8.41526 | 0.54578  |
| H | -2.2535  | -8.63736 | 0.61239  |
| H | -3.87253 | -9.32651 | 0.79861  |
| H | -3.5527  | -8.16188 | -0.49474 |

## TS2

Sum of electronic and thermal Free Energies = -1537.961739

Sum of electronic and thermal Enthalpies = -1537.855277

Imaginary frequency= -328.6019

|   |          |          |         |
|---|----------|----------|---------|
| C | -3.0884  | 0.42176  | 4.91512 |
| C | -2.63823 | -0.36301 | 3.83364 |
| C | -1.22793 | -0.51948 | 3.67701 |
| C | -0.33399 | 0.04241  | 4.60193 |
| C | -0.81119 | 0.81098  | 5.65732 |
| C | -2.19153 | 1.01265  | 5.79798 |
| H | -4.15362 | 0.53231  | 5.08839 |
| H | 0.73499  | -0.0939  | 4.47112 |
| H | -0.11848 | 1.2567   | 6.36347 |
| H | -2.56791 | 1.62308  | 6.61373 |
| C | -0.77956 | -1.20611 | 2.47699 |
| C | 0.60155  | -1.74949 | 2.27434 |
| H | 1.25783  | -0.97645 | 1.85731 |
| H | 1.02697  | -2.07953 | 3.22377 |
| H | 0.58333  | -2.5807  | 1.56932 |
| N | -1.71779 | -1.29453 | 1.58008 |
| O | -1.35661 | -1.92163 | 0.39069 |
| H | -2.14644 | -2.43451 | 0.14526 |

|    |          |          |          |                                                            |          |          |          |
|----|----------|----------|----------|------------------------------------------------------------|----------|----------|----------|
| Ru | -3.65536 | -0.55164 | 1.92598  | H                                                          | -3.72478 | 3.88111  | -0.44232 |
| C  | -4.34121 | 0.08823  | -0.20486 | H                                                          | -2.41438 | 3.78499  | -1.62836 |
| C  | -3.69468 | 1.25302  | 0.33582  | H                                                          | -3.91711 | 2.89074  | -1.89867 |
| C  | -4.18025 | 1.74968  | 1.56043  | H                                                          | -7.16184 | -1.72542 | 2.15298  |
| C  | -5.2293  | 1.08377  | 2.25119  | H                                                          | -7.02064 | -0.54954 | 3.4691   |
| C  | -5.91771 | -0.02555 | 1.69024  | H                                                          | -8.0246  | -0.18373 | 2.05921  |
| C  | -5.45493 | -0.49875 | 0.42839  | H                                                          | -1.90424 | 2.37708  | 0.36406  |
| H  | -3.98582 | -0.32991 | -1.13927 | <b>TS2'</b>                                                |          |          |          |
| H  | -3.69959 | 2.60612  | 2.02099  | Sum of electronic and thermal Free Energies = -1537.960585 |          |          |          |
| H  | -5.5329  | 1.44974  | 3.22613  | Sum of electronic and thermal Enthalpies = -1537.855216    |          |          |          |
| H  | -5.93842 | -1.35799 | -0.02421 | Imaginary frequency= -304.5645                             |          |          |          |
| C  | -7.09261 | -0.65997 | 2.38463  | C                                                          | -0.72454 | -4.67112 | 4.687    |
| C  | -3.75254 | -2.52797 | 2.51931  | C                                                          | -2.02269 | -4.33736 | 4.24344  |
| C  | -3.8653  | -3.82542 | 1.90666  | C                                                          | -3.11959 | -4.72758 | 5.07298  |
| C  | -4.12656 | -3.97951 | 0.52782  | C                                                          | -2.90301 | -5.35491 | 6.31009  |
| C  | -3.68419 | -4.98879 | 2.69047  | C                                                          | -1.61    | -5.67293 | 6.71281  |
| C  | -4.20975 | -5.24685 | -0.04604 | C                                                          | -0.5249  | -5.34853 | 5.88532  |
| H  | -4.29208 | -3.09729 | -0.0848  | H                                                          | 0.13508  | -4.36608 | 4.09894  |
| C  | -3.77118 | -6.24924 | 2.11129  | H                                                          | -3.74837 | -5.62932 | 6.93361  |
| H  | -3.47719 | -4.88436 | 3.75063  | H                                                          | -1.44331 | -6.17689 | 7.65916  |
| C  | -4.03196 | -6.38506 | 0.74286  | H                                                          | 0.4843   | -5.60671 | 6.19269  |
| H  | -4.41624 | -5.34713 | -1.10726 | C                                                          | -4.44667 | -4.52018 | 4.51589  |
| H  | -3.63205 | -7.13269 | 2.72682  | C                                                          | -5.71934 | -4.5707  | 5.3031   |
| H  | -4.09538 | -7.37221 | 0.29616  | H                                                          | -6.07019 | -5.60561 | 5.39246  |
| C  | -3.68536 | -1.97323 | 3.7112   | H                                                          | -5.56172 | -4.18008 | 6.31052  |
| C  | -4.25057 | -2.20853 | 4.95735  | H                                                          | -6.50016 | -3.99839 | 4.80285  |
| C  | -4.74136 | -2.42512 | 6.0547   | N                                                          | -4.40414 | -4.28766 | 3.23572  |
| C  | -5.30224 | -2.68452 | 7.33488  | O                                                          | -5.62414 | -4.08431 | 2.59953  |
| C  | -4.74572 | -2.08922 | 8.48681  | H                                                          | -5.45797 | -3.30753 | 2.03347  |
| C  | -6.41762 | -3.53785 | 7.46971  | Ru                                                         | -2.60507 | -4.20261 | 2.18405  |
| C  | -5.29738 | -2.34113 | 9.73881  | C                                                          | -3.13544 | -5.90508 | 0.74027  |
| H  | -3.88362 | -1.43832 | 8.38306  | C                                                          | -1.93901 | -6.33459 | 1.35688  |
| C  | -6.9583  | -3.78607 | 8.72734  | C                                                          | -0.85692 | -5.4135  | 1.31193  |
| H  | -6.84527 | -3.9974  | 6.58452  | C                                                          | -0.91298 | -4.21872 | 0.54824  |
| C  | -6.40205 | -3.18886 | 9.86224  | C                                                          | -2.0734  | -3.86508 | -0.19752 |
| H  | -4.86429 | -1.88037 | 10.62122 | C                                                          | -3.20516 | -4.70077 | -0.02394 |
| H  | -7.81525 | -4.44534 | 8.82466  | H                                                          | -4.03084 | -6.51148 | 0.83542  |
| H  | -6.82778 | -3.38505 | 10.84151 | H                                                          | 0.05301  | -5.64282 | 1.85637  |
| C  | -2.58965 | 1.99461  | -0.40274 | H                                                          | -0.03506 | -3.58529 | 0.52185  |
| C  | -1.78024 | 1.12835  | -1.37819 | H                                                          | -4.14457 | -4.44995 | -0.49813 |
| C  | -3.20303 | 3.21164  | -1.13255 | C                                                          | -2.05453 | -2.68913 | -1.18409 |
| H  | -1.39446 | 0.2213   | -0.9062  | C                                                          | -1.26791 | -3.18479 | -2.42756 |
| H  | -2.37672 | 0.83792  | -2.25052 | C                                                          | -3.47241 | -2.2754  | -1.62385 |
| H  | -0.93047 | 1.70391  | -1.75547 | C                                                          | -1.34315 | -1.45262 | -0.59381 |

|                                                            |          |          |          |    |          |          |          |
|------------------------------------------------------------|----------|----------|----------|----|----------|----------|----------|
| H                                                          | -1.74298 | -4.06162 | -2.87902 | C  | -0.08691 | -1.36337 | 3.9006   |
| H                                                          | -1.23647 | -2.39273 | -3.18218 | C  | 1.07038  | -0.58404 | 4.04883  |
| H                                                          | -4.08796 | -1.97183 | -0.77192 | C  | 1.08907  | 0.5315   | 4.87936  |
| H                                                          | -3.40371 | -1.42126 | -2.30305 | C  | -0.06754 | 0.87466  | 5.58469  |
| H                                                          | -3.98766 | -3.07301 | -2.16806 | H  | -2.08145 | 0.33387  | 6.07797  |
| H                                                          | -1.32585 | -0.65532 | -1.3426  | H  | 1.95865  | -0.85026 | 3.4861   |
| H                                                          | -1.86994 | -1.07695 | 0.28715  | H  | 1.99328  | 1.12548  | 4.97681  |
| H                                                          | -0.30327 | -1.65517 | -0.32165 | H  | -0.07009 | 1.74227  | 6.23726  |
| C                                                          | -1.83498 | -7.64951 | 2.07953  | C  | -0.07504 | -2.46422 | 2.92148  |
| H                                                          | -1.4347  | -8.41895 | 1.40896  | C  | 1.07943  | -3.40627 | 2.75159  |
| H                                                          | -1.16545 | -7.57627 | 2.94029  | H  | 1.74899  | -3.05663 | 1.95608  |
| H                                                          | -2.8132  | -7.98833 | 2.42936  | H  | 1.65251  | -3.48025 | 3.67747  |
| C                                                          | -4.7716  | -0.57968 | 1.79413  | H  | 0.7171   | -4.39346 | 2.45585  |
| C                                                          | -5.72754 | 0.33956  | 1.27636  | N  | -1.14843 | -2.52203 | 2.20546  |
| C                                                          | -5.33005 | 1.64355  | 0.91233  | O  | -1.18512 | -3.5351  | 1.25457  |
| C                                                          | -7.07796 | -0.03688 | 1.12263  | H  | -2.13246 | -3.72981 | 1.16735  |
| C                                                          | -6.26446 | 2.54142  | 0.4058   | Ru | -2.73891 | -1.13786 | 2.47331  |
| H                                                          | -4.29278 | 1.93737  | 1.03472  | C  | -3.72545 | 0.90022  | 2.45423  |
| C                                                          | -8.00373 | 0.87043  | 0.61676  | C  | -4.75828 | -0.05314 | 2.27928  |
| H                                                          | -7.39153 | -1.03582 | 1.40988  | C  | -4.57924 | -0.98428 | 1.21188  |
| C                                                          | -7.60041 | 2.15894  | 0.25648  | C  | -3.4333  | -0.91038 | 0.37199  |
| H                                                          | -5.95119 | 3.54322  | 0.12886  | C  | -2.48671 | 0.17288  | 0.45651  |
| H                                                          | -9.04189 | 0.57358  | 0.50499  | C  | -2.65176 | 1.06723  | 1.51978  |
| H                                                          | -8.32585 | 2.86396  | -0.13741 | H  | -3.76438 | 1.55736  | 3.31736  |
| C                                                          | -3.90982 | -1.31876 | 2.2575   | H  | -5.31955 | -1.75809 | 1.04804  |
| C                                                          | -3.00524 | -2.22757 | 2.74999  | H  | -3.3055  | -1.65206 | -0.41109 |
| C                                                          | -2.076   | -2.50217 | 3.62544  | H  | -1.92265 | 1.8472   | 1.70168  |
| C                                                          | -1.01612 | -1.71821 | 4.27155  | C  | -1.37742 | 0.27633  | -0.5751  |
| C                                                          | -0.25642 | -0.8251  | 3.4933   | C  | -1.90037 | 1.05818  | -1.80305 |
| C                                                          | -0.80931 | -1.75874 | 5.6617   | C  | -0.07771 | 0.89258  | -0.03944 |
| C                                                          | 0.69498  | -0.00141 | 4.09179  | H  | -2.80757 | 0.60841  | -2.21917 |
| H                                                          | -0.41783 | -0.7846  | 2.421    | H  | -2.12985 | 2.0954   | -1.53427 |
| C                                                          | 0.13239  | -0.92238 | 6.25574  | H  | -1.14058 | 1.07126  | -2.59016 |
| H                                                          | -1.40266 | -2.4283  | 6.2742   | H  | 0.29592  | 0.35013  | 0.83527  |
| C                                                          | 0.89149  | -0.04793 | 5.4735   | H  | 0.69266  | 0.8588   | -0.81474 |
| H                                                          | 1.27955  | 0.67897  | 3.48004  | H  | -0.20797 | 1.9446   | 0.23804  |
| H                                                          | 0.27216  | -0.94981 | 7.332    | C  | -5.95251 | -0.11796 | 3.19207  |
| H                                                          | 1.62969  | 0.59719  | 5.93991  | H  | -6.7869  | 0.44835  | 2.76166  |
| H                                                          | -0.23646 | -3.44935 | -2.17436 | H  | -6.28381 | -1.14894 | 3.33819  |
| <b>IM4</b>                                                 |          |          |          | H  | -5.72638 | 0.31303  | 4.17042  |
| Sum of electronic and thermal Free Energies = -1537.989945 |          |          |          | C  | -3.14536 | -2.58269 | 3.82465  |
| Sum of electronic and thermal Enthalpies = -1537.881516    |          |          |          | C  | -3.97528 | -3.77933 | 3.81455  |
| C                                                          | -1.21161 | 0.09352  | 5.47678  | C  | -4.63788 | -4.18225 | 2.63229  |
| C                                                          | -1.2675  | -1.0521  | 4.64806  | C  | -4.06471 | -4.64499 | 4.93208  |

|   |          |          |          |    |          |          |          |
|---|----------|----------|----------|----|----------|----------|----------|
| C | -5.37228 | -5.36318 | 2.57075  | Ru | -2.67134 | -4.5225  | 2.16607  |
| H | -4.55694 | -3.56281 | 1.74752  | C  | -3.39635 | -6.27686 | 0.80037  |
| C | -4.80252 | -5.82148 | 4.86974  | C  | -2.18025 | -6.74516 | 1.31874  |
| H | -3.54888 | -4.38869 | 5.84839  | C  | -1.07568 | -5.83386 | 1.24928  |
| C | -5.46535 | -6.18627 | 3.69388  | C  | -1.10959 | -4.63302 | 0.49395  |
| H | -5.86726 | -5.64438 | 1.64587  | C  | -2.32551 | -4.20184 | -0.10541 |
| H | -4.85498 | -6.46388 | 5.74343  | C  | -3.48382 | -4.9952  | 0.15491  |
| H | -6.03757 | -7.10741 | 3.65113  | H  | -4.29964 | -6.86698 | 0.92283  |
| C | -2.44085 | -2.00873 | 4.86619  | H  | -0.15436 | -6.09572 | 1.76135  |
| C | -2.85955 | -2.10033 | 6.21743  | H  | -0.21774 | -4.0239  | 0.42437  |
| C | -3.23036 | -2.11117 | 7.38062  | H  | -4.44406 | -4.66549 | -0.22979 |
| C | -3.66702 | -2.1123  | 8.73377  | C  | -2.43354 | -2.97534 | -0.99257 |
| C | -2.83826 | -1.59794 | 9.75261  | C  | -2.60207 | -3.43735 | -2.45993 |
| C | -4.93793 | -2.62254 | 9.07302  | C  | -1.26233 | -1.99302 | -0.86102 |
| C | -3.27581 | -1.59291 | 11.07319 | H  | -3.46195 | -4.10243 | -2.58781 |
| H | -1.85819 | -1.2102  | 9.49466  | H  | -2.75018 | -2.56737 | -3.10668 |
| C | -5.36371 | -2.615   | 10.3975  | H  | -1.46267 | -1.10377 | -1.46474 |
| H | -5.57763 | -3.01749 | 8.29063  | H  | -1.12041 | -1.6668  | 0.17136  |
| C | -4.53657 | -2.10037 | 11.39938 | H  | -0.32553 | -2.42651 | -1.22662 |
| H | -2.63235 | -1.19497 | 11.85141 | C  | -2.04267 | -8.08086 | 1.99838  |
| H | -6.34295 | -3.00923 | 10.6506  | H  | -1.51322 | -8.78681 | 1.34773  |
| H | -4.87319 | -2.09531 | 12.43148 | H  | -1.46884 | -7.9939  | 2.92614  |
| H | -1.15534 | -0.74843 | -0.9023  | H  | -3.01928 | -8.51103 | 2.23446  |

#### IM4'

Sum of electronic and thermal Free Energies = -1537.996447

Sum of electronic and thermal Enthalpies = -1537.888675

|   |          |          |         |   |          |          |          |
|---|----------|----------|---------|---|----------|----------|----------|
| C | -0.28085 | -4.1     | 4.67929 | C | -3.99431 | -0.6167  | 1.46934  |
| C | -1.65083 | -3.82472 | 4.43894 | C | -4.75432 | 0.47632  | 0.96614  |
| C | -2.60088 | -4.8038  | 4.881   | C | -4.96902 | 1.60412  | 1.78861  |
| C | -2.16226 | -5.95878 | 5.55962 | C | -5.30141 | 0.463    | -0.33308 |
| C | -0.81093 | -6.18346 | 5.78494 | C | -5.7136  | 2.68159  | 1.31962  |
| C | 0.13419  | -5.25107 | 5.33314 | H | -4.54702 | 1.61545  | 2.78792  |
| H | 0.44772  | -3.35366 | 4.3766  | C | -6.04249 | 1.54765  | -0.79321 |
| H | -2.89767 | -6.67584 | 5.9132  | H | -5.13984 | -0.39943 | -0.97252 |
| H | -0.49067 | -7.07268 | 6.32225 | C | -6.25129 | 2.65755  | 0.02991  |
| H | 1.19138  | -5.41727 | 5.5165  | H | -5.87516 | 3.54296  | 1.9602   |
| C | -4.06599 | -4.59887 | 4.67447 | H | -6.45828 | 1.52918  | -1.79575 |
| C | -5.08344 | -4.64052 | 5.77237 | H | -6.83173 | 3.50038  | -0.33274 |
| H | -5.47478 | -5.65774 | 5.8966  | C | -3.33736 | -1.49431 | 2.01664  |
| H | -4.63601 | -4.33157 | 6.7197  | C | -2.68084 | -2.52088 | 2.6968   |
| H | -5.92878 | -3.99406 | 5.52735 | C | -2.03599 | -2.46883 | 3.89158  |
| N | -4.33427 | -4.40121 | 3.43189 | C | -1.62113 | -1.26558 | 4.64393  |
| O | -5.65865 | -4.19299 | 3.09266 | C | -1.2871  | -0.06946 | 3.9785   |
| H | -5.60721 | -3.62062 | 2.309   | C | -1.53608 | -1.29514 | 6.04962  |
|   |          |          |         | C | -0.89559 | 1.05851  | 4.69601  |
|   |          |          |         | H | -1.31948 | -0.03294 | 2.89512  |
|   |          |          |         | C | -1.1544  | -0.16275 | 6.76501  |

|   |          |          |          |
|---|----------|----------|----------|
| H | -1.78402 | -2.20677 | 6.58787  |
| C | -0.82802 | 1.01787  | 6.09096  |
| H | -0.6261  | 1.96759  | 4.16285  |
| H | -1.10761 | -0.20216 | 7.8495   |
| H | -0.51766 | 1.89739  | 6.64769  |
| H | -1.70858 | -3.96644 | -2.80846 |
| H | -3.35039 | -2.45009 | -0.69246 |

**TS3**

Sum of electronic and thermal Free Energies = -1537.858696

Sum of electronic and thermal Enthalpies = -1537.964314

Imaginary frequency= -354.8503

|    |          |          |          |
|----|----------|----------|----------|
| C  | -0.31336 | -0.3223  | 5.3795   |
| C  | -0.62548 | -1.44148 | 4.5695   |
| C  | 0.463    | -2.11453 | 3.91229  |
| C  | 1.7992   | -1.67492 | 4.13669  |
| C  | 2.06268  | -0.58244 | 4.92933  |
| C  | 0.99044  | 0.09771  | 5.54941  |
| H  | -1.12219 | 0.18818  | 5.88972  |
| H  | 2.61562  | -2.17964 | 3.63298  |
| H  | 3.08215  | -0.24118 | 5.07164  |
| H  | 1.19528  | 0.95554  | 6.18332  |
| C  | 0.18832  | -3.19298 | 3.03562  |
| C  | 1.18756  | -4.2301  | 2.62549  |
| H  | 2.10155  | -4.15755 | 3.21131  |
| H  | 0.75355  | -5.22504 | 2.76058  |
| H  | 1.42668  | -4.14538 | 1.55969  |
| N  | -1.06878 | -3.26776 | 2.54367  |
| O  | -1.25032 | -4.35252 | 1.66889  |
| H  | -1.99979 | -4.8576  | 2.03954  |
| Ru | -2.64435 | -1.72137 | 2.35646  |
| C  | -4.02416 | 0.01468  | 2.26046  |
| C  | -4.7952  | -1.13687 | 1.93351  |
| C  | -4.32582 | -1.93936 | 0.85197  |
| C  | -3.15162 | -1.56848 | 0.14692  |
| C  | -2.47136 | -0.32527 | 0.38444  |
| C  | -2.92884 | 0.45826  | 1.45201  |
| H  | -4.29708 | 0.59397  | 3.13649  |
| H  | -4.85269 | -2.8473  | 0.57834  |
| H  | -2.77771 | -2.23654 | -0.62094 |
| H  | -2.4089  | 1.3721   | 1.71798  |
| C  | -1.3052  | 0.12001  | -0.48268 |
| C  | -1.81948 | 0.5428   | -1.8746  |
| C  | -0.19044 | -0.93325 | -0.5959  |
| H  | -2.25121 | -0.30766 | -2.4131  |

|   |          |          |          |
|---|----------|----------|----------|
| H | -2.58556 | 1.32034  | -1.80065 |
| H | -0.99575 | 0.93584  | -2.47818 |
| H | 0.63628  | -0.53723 | -1.19309 |
| H | 0.19916  | -1.20201 | 0.39064  |
| H | -0.53898 | -1.8475  | -1.08794 |
| C | -6.03401 | -1.49198 | 2.71056  |
| H | -6.91062 | -1.0153  | 2.2554   |
| H | -6.20632 | -2.57126 | 2.7189   |
| H | -5.96309 | -1.1445  | 3.7443   |
| C | -2.44992 | -3.08448 | 3.746    |
| C | -3.00355 | -4.36449 | 4.17833  |
| C | -2.60981 | -4.93887 | 5.40514  |
| C | -3.89728 | -5.0719  | 3.34693  |
| C | -3.1031  | -6.18149 | 5.78759  |
| H | -1.92735 | -4.39576 | 6.05124  |
| C | -4.37686 | -6.32475 | 3.72804  |
| H | -4.23298 | -4.60878 | 2.42302  |
| C | -3.9804  | -6.87812 | 4.94788  |
| H | -2.80344 | -6.61373 | 6.73709  |
| H | -5.06645 | -6.86185 | 3.08447  |
| H | -4.35801 | -7.85053 | 5.24864  |
| C | -1.98937 | -1.95246 | 4.53828  |
| C | -2.91681 | -1.53596 | 5.54002  |
| C | -3.74418 | -1.20556 | 6.37165  |
| C | -4.71879 | -0.82836 | 7.34043  |
| C | -4.40034 | 0.08889  | 8.36232  |
| C | -6.01956 | -1.3708  | 7.2869   |
| C | -5.36231 | 0.45475  | 9.29926  |
| H | -3.39962 | 0.50547  | 8.41133  |
| C | -6.97237 | -1.00151 | 8.23172  |
| H | -6.26624 | -2.08508 | 6.50769  |
| C | -6.64848 | -0.08784 | 9.23801  |
| H | -5.10785 | 1.1631   | 10.08142 |
| H | -7.97005 | -1.42689 | 8.18421  |
| H | -7.3948  | 0.19875  | 9.97244  |
| H | -0.87549 | 1.00683  | -0.0005  |

**IM5**

Sum of electronic and thermal Free Energies = -1537.993747

Sum of electronic and thermal Enthalpies = -1537.890523

|   |          |          |         |
|---|----------|----------|---------|
| C | -0.72794 | 0.01789  | 5.26253 |
| C | -0.93911 | -1.21296 | 4.55307 |
| C | 0.00989  | -1.59705 | 3.49264 |
| C | 1.01639  | -0.6255  | 3.12516 |
| C | 1.11711  | 0.57198  | 3.77345 |



|    |          |          |          |                                               |              |          |          |
|----|----------|----------|----------|-----------------------------------------------|--------------|----------|----------|
| C  | 0.26081  | 0.87855  | 4.87837  | H                                             | -2.52382     | -4.73631 | 1.64506  |
| H  | -1.38055 | 0.24139  | 6.09977  | C                                             | -4.96404     | -6.39049 | 3.34449  |
| H  | 1.717    | -0.87121 | 2.33335  | H                                             | -5.55699     | -5.95459 | 5.36845  |
| H  | 1.88113  | 1.28422  | 3.47867  | H                                             | -4.13333     | -6.59729 | 1.36326  |
| H  | 0.40613  | 1.80884  | 5.41878  | H                                             | -5.68245     | -7.19436 | 3.2185   |
| C  | 0.31157  | -3.02277 | 3.3978   | C                                             | -2.05732     | -2.10679 | 4.7706   |
| C  | 1.6883   | -3.58491 | 3.26743  | C                                             | -2.97634     | -1.88054 | 5.82711  |
| H  | 2.2676   | -3.00494 | 2.54616  | C                                             | -3.72955     | -1.62702 | 6.75071  |
| H  | 2.20686  | -3.51273 | 4.23122  | C                                             | -4.62022     | -1.36025 | 7.83175  |
| H  | 1.66152  | -4.63276 | 2.97037  | C                                             | -4.22736     | -0.51261 | 8.88731  |
| N  | -0.7122  | -3.80883 | 3.60061  | C                                             | -5.90366     | -1.94341 | 7.85888  |
| O  | -0.45868 | -5.11102 | 4.00418  | C                                             | -5.10019     | -0.25754 | 9.94088  |
| H  | -1.22921 | -5.61447 | 3.67483  | H                                             | -3.23798     | -0.06683 | 8.87328  |
| Ru | -2.21006 | -1.39143 | 2.7459   | C                                             | -6.76838     | -1.68177 | 8.91744  |
| C  | -3.45667 | 0.55192  | 2.36584  | H                                             | -6.21027     | -2.59601 | 7.04751  |
| C  | -4.34623 | -0.55314 | 2.46435  | C                                             | -6.37043     | -0.83964 | 9.95927  |
| C  | -4.1064  | -1.65692 | 1.59756  | H                                             | -4.78884     | 0.39483  | 10.75079 |
| C  | -3.08056 | -1.63066 | 0.60743  | H                                             | -7.75481     | -2.13497 | 8.93111  |
| C  | -2.2056  | -0.52518 | 0.50039  | H                                             | -7.04776     | -0.63843 | 10.78343 |
| C  | -2.39586 | 0.54272  | 1.43581  | H                                             | -0.46575     | 0.34221  | -0.48772 |
| H  | -3.56416 | 1.38977  | 3.04647  | <b>TS4</b>                                    |              |          |          |
| H  | -4.73376 | -2.53811 | 1.67957  | Sum of electronic and thermal Free Energies = | -1998.775247 |          |          |
| H  | -2.98003 | -2.47676 | -0.06069 | Sum of electronic and thermal Enthalpies =    | -1998.665335 |          |          |
| H  | -1.70758 | 1.37736  | 1.43895  | Imaginary frequency=                          | -109.3277    |          |          |
| C  | -1.1621  | -0.45799 | -0.62801 | C                                             | 0.4283       | -4.89902 | 6.67576  |
| C  | -1.94021 | -0.20939 | -1.94665 | C                                             | -0.04447     | -4.00739 | 5.66163  |
| C  | -0.37465 | -1.78084 | -0.74528 | C                                             | 0.92897      | -3.22346 | 4.92244  |
| H  | -2.63205 | -1.02797 | -2.1677  | C                                             | 2.3178       | -3.32169 | 5.30104  |
| H  | -2.51831 | 0.71879  | -1.89766 | C                                             | 2.71298      | -4.16388 | 6.29829  |
| H  | -1.2393  | -0.12557 | -2.78326 | C                                             | 1.75632      | -4.97012 | 6.99175  |
| H  | 0.34835  | -1.709   | -1.56342 | H                                             | -0.29969     | -5.49893 | 7.20915  |
| H  | 0.17243  | -1.99556 | 0.17758  | H                                             | 3.05409      | -2.73055 | 4.76932  |
| H  | -1.02167 | -2.63535 | -0.96243 | H                                             | 3.76263      | -4.23174 | 6.56652  |
| C  | -5.48543 | -0.56084 | 3.44614  | H                                             | 2.09238      | -5.63604 | 7.78026  |
| H  | -6.34276 | -0.01999 | 3.02844  | C                                             | 0.53968      | -2.43816 | 3.84987  |
| H  | -5.80705 | -1.58055 | 3.66945  | C                                             | 1.48343      | -1.69656 | 2.94471  |
| H  | -5.20571 | -0.07661 | 4.38509  | H                                             | 2.17297      | -1.0758  | 3.52635  |
| C  | -2.06376 | -3.22465 | 3.79322  | H                                             | 2.09628      | -2.3814  | 2.3478   |
| C  | -3.10439 | -4.2958  | 3.67867  | H                                             | 0.94058      | -1.05134 | 2.25491  |
| C  | -3.96689 | -4.66105 | 4.72387  | N                                             | -0.82768     | -2.35125 | 3.50148  |
| C  | -3.17846 | -5.0164  | 2.46713  | O                                             | -0.96634     | -2.8199  | 2.02827  |
| C  | -4.8961  | -5.68932 | 4.54869  | Ru                                            | -1.81762     | -0.64405 | 4.2658   |
| H  | -3.90647 | -4.14983 | 5.67607  | C                                             | -0.33058     | 0.65987  | 5.3526   |
| C  | -4.0936  | -6.05649 | 2.30405  | C                                             | -1.4256      | 0.50992  | 6.25498  |

|    |          |          |          |                                               |              |          |         |
|----|----------|----------|----------|-----------------------------------------------|--------------|----------|---------|
| C  | -2.71407 | 0.83185  | 5.75094  | H                                             | -1.17758     | 0.95366  | 9.66326 |
| C  | -2.88658 | 1.32618  | 4.43091  | H                                             | -0.30404     | 1.86581  | 8.42198 |
| C  | -1.78253 | 1.59499  | 3.56787  | H                                             | -2.07315     | 1.93215  | 8.49001 |
| C  | -0.50644 | 1.20984  | 4.04844  | C                                             | -0.0665      | -0.88008 | 7.93139 |
| H  | 0.66218  | 0.35424  | 5.65959  | H                                             | -0.09839     | -1.2647  | 8.95543 |
| H  | -3.59004 | 0.64207  | 6.36116  | H                                             | -0.06665     | -1.73619 | 7.25081 |
| H  | -3.89418 | 1.48957  | 4.06339  | H                                             | 0.8839       | -0.34587 | 7.82052 |
| H  | 0.35611  | 1.31022  | 3.39788  | <b>IM6</b>                                    |              |          |         |
| C  | -1.97281 | 2.23573  | 2.22065  | Sum of electronic and thermal Free Energies = | -1922.505066 |          |         |
| C  | -1.26894 | 0.04269  | 7.69165  | Sum of electronic and thermal Enthalpies =    | -1922.400364 |          |         |
| H  | -2.18057 | -0.5163  | 7.93887  | C                                             | 0.60009      | -5.49028 | 6.39038 |
| C  | -1.82415 | -2.8773  | 4.4038   | C                                             | 0.13954      | -4.31258 | 5.75661 |
| C  | -3.19691 | -2.45058 | 4.08111  | C                                             | 1.08332      | -3.40482 | 5.19316 |
| C  | -3.45687 | -1.72832 | 2.86973  | C                                             | 2.46739      | -3.71031 | 5.28895 |
| C  | -4.27402 | -2.58447 | 5.02287  | C                                             | 2.89051      | -4.8633  | 5.91341 |
| C  | -4.7459  | -1.16723 | 2.64322  | C                                             | 1.94977      | -5.75992 | 6.46697 |
| H  | -2.79934 | -1.8306  | 2.02166  | H                                             | -0.12819     | -6.17605 | 6.80789 |
| C  | -5.50774 | -2.0412  | 4.75947  | H                                             | 3.20059      | -3.0333  | 4.86765 |
| H  | -4.10307 | -3.10888 | 5.95202  | H                                             | 3.95075      | -5.08582 | 5.97835 |
| C  | -5.7549  | -1.3174  | 3.56389  | H                                             | 2.29369      | -6.66758 | 6.95308 |
| H  | -4.92876 | -0.66286 | 1.69915  | C                                             | 0.61839      | -2.20894 | 4.55556 |
| H  | -6.30584 | -2.16173 | 5.48616  | C                                             | 1.59935      | -1.24102 | 3.95501 |
| H  | -6.74342 | -0.91214 | 3.37195  | H                                             | 2.23352      | -0.79109 | 4.72812 |
| C  | -1.41768 | -3.86793 | 5.37105  | H                                             | 2.2613       | -1.75972 | 3.25534 |
| C  | -2.36113 | -4.72524 | 5.98042  | H                                             | 1.08658      | -0.46176 | 3.39779 |
| C  | -3.13545 | -5.51074 | 6.50236  | N                                             | -0.6862      | -1.94373 | 4.50242 |
| C  | -4.083   | -6.39793 | 7.08188  | Ru                                            | -1.6887      | -0.16147 | 3.79186 |
| C  | -3.71027 | -7.27019 | 8.12576  | C                                             | -0.64067     | 1.2541   | 5.12115 |
| C  | -5.41442 | -6.41107 | 6.61388  | C                                             | -1.83199     | 0.90141  | 5.82964 |
| C  | -4.6501  | -8.12935 | 8.68585  | C                                             | -3.04257     | 1.03904  | 5.11304 |
| H  | -2.68714 | -7.26431 | 8.4871   | C                                             | -3.09542     | 1.65103  | 3.81668 |
| C  | -6.34496 | -7.27501 | 7.18124  | C                                             | -1.93561     | 2.10769  | 3.16206 |
| H  | -5.69984 | -5.7458  | 5.80518  | C                                             | -0.68668     | 1.8137   | 3.81648 |
| C  | -5.96684 | -8.13429 | 8.21714  | H                                             | 0.32509      | 1.05732  | 5.57467 |
| H  | -4.35638 | -8.79798 | 9.48901  | H                                             | -3.9615      | 0.65699  | 5.54421 |
| H  | -7.36663 | -7.28177 | 6.8146   | H                                             | -4.05648     | 1.72194  | 3.32447 |
| H  | -6.69607 | -8.80758 | 8.65673  | H                                             | 0.24516      | 2.02576  | 3.30995 |
| Cl | -0.60067 | -0.58936 | -0.28125 | C                                             | -2.01297     | 2.87894  | 1.83801 |
| H  | -0.65532 | -3.74306 | 2.05114  | C                                             | -2.45469     | 4.3187   | 2.21913 |
| H  | -0.72063 | -1.57118 | 0.56443  | C                                             | -0.64923     | 2.94986  | 1.12242 |
| H  | -1.16477 | 1.97734  | 1.53206  | H                                             | -3.4425      | 4.32903  | 2.69081 |
| H  | -1.99049 | 3.32765  | 2.33386  | H                                             | -1.74351     | 4.79182  | 2.90434 |
| H  | -2.92094 | 1.93537  | 1.7676   | H                                             | -2.50702     | 4.93257  | 1.31478 |
| C  | -1.20644 | 1.27712  | 8.61867  | H                                             | -0.26412     | 1.95365  | 0.89067 |

|    |          |          |         |
|----|----------|----------|---------|
| H  | -0.76929 | 3.49253  | 0.18086 |
| H  | 0.09633  | 3.49699  | 1.70929 |
| C  | -1.77991 | 0.35265  | 7.22749 |
| H  | -1.76075 | 1.17922  | 7.9474  |
| H  | -2.65592 | -0.2608  | 7.44667 |
| H  | -0.88144 | -0.24861 | 7.38905 |
| C  | -1.61872 | -2.82391 | 5.00401 |
| C  | -3.01674 | -2.4024  | 4.74625 |
| C  | -3.36346 | -2.03947 | 3.41992 |
| C  | -3.99593 | -2.34023 | 5.75463 |
| C  | -4.66822 | -1.58415 | 3.13521 |
| H  | -2.69882 | -2.32894 | 2.61247 |
| C  | -5.28234 | -1.90373 | 5.44983 |
| H  | -3.74637 | -2.64107 | 6.766   |
| C  | -5.61991 | -1.50765 | 4.14402 |
| H  | -4.9282  | -1.33662 | 2.1105  |
| H  | -6.03402 | -1.86786 | 6.23331 |
| H  | -6.62976 | -1.17626 | 3.92272 |
| C  | -1.26095 | -4.00394 | 5.64289 |
| C  | -2.24055 | -4.89809 | 6.14408 |
| C  | -3.05914 | -5.68614 | 6.58263 |
| C  | -4.04592 | -6.58016 | 7.08592 |
| C  | -3.68127 | -7.65765 | 7.91879 |
| C  | -5.40452 | -6.39234 | 6.75693 |
| C  | -4.65524 | -8.52181 | 8.40949 |
| H  | -2.63685 | -7.80514 | 8.17373 |
| C  | -6.36997 | -7.26263 | 7.25326 |
| H  | -5.68507 | -5.56685 | 6.11065 |
| C  | -5.99928 | -8.32728 | 8.0795  |
| H  | -4.36661 | -9.34927 | 9.05015 |
| H  | -7.41371 | -7.1136  | 6.99417 |
| H  | -6.75567 | -9.00469 | 8.46372 |
| Cl | -0.9097  | -0.73441 | 1.55666 |
| H  | -2.73214 | 2.45058  | 1.17152 |

**PI**

Sum of electronic and thermal Free Energies = -979.239413

Sum of electronic and thermal Enthalpies = -979.167902

|   |          |          |         |
|---|----------|----------|---------|
| C | 0.60009  | -5.49028 | 6.39038 |
| C | 0.13954  | -4.31258 | 5.75661 |
| C | 1.08332  | -3.40482 | 5.19316 |
| C | 2.46739  | -3.71031 | 5.28895 |
| C | 2.89051  | -4.8633  | 5.91341 |
| C | 1.94977  | -5.75992 | 6.46697 |
| H | -0.12819 | -6.17605 | 6.80789 |

|   |          |          |         |
|---|----------|----------|---------|
| H | 3.20059  | -3.0333  | 4.86765 |
| H | 3.95075  | -5.08582 | 5.97835 |
| H | 2.29369  | -6.66758 | 6.95308 |
| C | 0.61839  | -2.20894 | 4.55556 |
| C | 1.59935  | -1.24102 | 3.95501 |
| H | 2.23352  | -0.79109 | 4.72812 |
| H | 2.2613   | -1.75972 | 3.25534 |
| H | 1.08658  | -0.46176 | 3.39779 |
| N | -0.6862  | -1.94373 | 4.50242 |
| C | -1.61872 | -2.82391 | 5.00401 |
| C | -3.01674 | -2.4024  | 4.74625 |
| C | -3.36346 | -2.03947 | 3.41992 |
| C | -3.99593 | -2.34023 | 5.75463 |
| C | -4.66822 | -1.58415 | 3.13521 |
| H | -2.69882 | -2.32894 | 2.61247 |
| C | -5.28234 | -1.90373 | 5.44983 |
| C | -3.74637 | -2.64107 | 6.766   |
| H | -2.69882 | -2.32894 | 2.61247 |
| C | -5.28234 | -1.90373 | 5.44983 |
| H | -3.74637 | -2.64107 | 6.766   |
| C | -5.61991 | -1.50765 | 4.14402 |
| H | -4.9282  | -1.33662 | 2.1105  |
| H | -6.03402 | -1.86786 | 6.23331 |
| H | -6.62976 | -1.17626 | 3.92272 |
| C | -1.26095 | -4.00394 | 5.64289 |
| H | -6.03402 | -1.86786 | 6.23331 |
| H | -6.62976 | -1.17626 | 3.92272 |
| C | -1.26095 | -4.00394 | 5.64289 |
| C | -2.24055 | -4.89809 | 6.14408 |
| C | -3.05914 | -5.68614 | 6.58263 |
| C | -4.04592 | -6.58016 | 7.08592 |
| C | -3.68127 | -7.65765 | 7.91879 |
| C | -5.40452 | -6.39234 | 6.75693 |
| C | -4.65524 | -8.52181 | 8.40949 |
| C | -3.68127 | -7.65765 | 7.91879 |
| C | -5.40452 | -6.39234 | 6.75693 |
| C | -4.65524 | -8.52181 | 8.40949 |
| H | -2.63685 | -7.80514 | 8.17373 |
| C | -6.36997 | -7.26263 | 7.25326 |
| H | -5.68507 | -5.56685 | 6.11065 |
| C | -5.99928 | -8.32728 | 8.0795  |
| H | -4.36661 | -9.34927 | 9.05015 |
| H | -7.41371 | -7.1136  | 6.99417 |
| H | -6.75567 | -9.00469 | 8.46372 |

**IM1a**

Sum of electronic and thermal Free Energies = -1383.328957

Sum of electronic and thermal Enthalpies = -1383.249231

|   |          |          |         |
|---|----------|----------|---------|
| C | -2.84822 | -2.63949 | 2.14156 |
| C | -1.67938 | -1.88113 | 2.23415 |
| C | -1.69552 | -0.50809 | 1.91907 |
| C | -2.90207 | 0.09228  | 1.5218  |
| C | -4.05758 | -0.67411 | 1.41367 |
| C | -4.03488 | -2.03923 | 1.72453 |

|                                                            |          |          |          |    |          |          |          |
|------------------------------------------------------------|----------|----------|----------|----|----------|----------|----------|
| H                                                          | -2.83622 | -3.68829 | 2.42158  | C  | -1.72431 | -0.55608 | 1.85391  |
| H                                                          | -0.77494 | -2.32506 | 2.63773  | C  | -2.87825 | 0.13025  | 1.44743  |
| H                                                          | -2.92886 | 1.14404  | 1.2564   | C  | -4.04249 | -0.57619 | 1.16485  |
| H                                                          | -4.98186 | -0.20879 | 1.08703  | C  | -4.08005 | -1.96833 | 1.31336  |
| H                                                          | -4.94598 | -2.6249  | 1.65754  | H  | -2.99015 | -3.72426 | 1.91856  |
| C                                                          | -0.4536  | 0.27667  | 2.0265   | H  | -0.92238 | -2.44989 | 2.48692  |
| C                                                          | -0.43791 | 1.62515  | 2.68893  | H  | -2.84959 | 1.2066   | 1.31114  |
| H                                                          | -1.44106 | 2.05108  | 2.70377  | H  | -4.9256  | -0.0438  | 0.82513  |
| H                                                          | -0.1223  | 1.54195  | 3.73816  | H  | -4.99694 | -2.51032 | 1.10193  |
| H                                                          | 0.24367  | 2.3077   | 2.17398  | C  | -0.45766 | 0.16185  | 2.09253  |
| N                                                          | 0.63043  | -0.27171 | 1.56543  | C  | -0.39941 | 1.38313  | 2.95906  |
| O                                                          | 1.83679  | 0.39832  | 1.7975   | H  | -1.40091 | 1.76775  | 3.15362  |
| H                                                          | 1.8205   | 0.7273   | 2.71435  | H  | 0.06086  | 1.09728  | 3.91181  |
| Ru                                                         | 0.80046  | -1.92593 | 0.23593  | H  | 0.23113  | 2.15239  | 2.50908  |
| Cl                                                         | -0.51651 | -0.71213 | -1.27355 | N  | 0.60743  | -0.35183 | 1.56377  |
| C                                                          | 1.01339  | -3.95331 | -0.71028 | O  | 1.79149  | 0.32276  | 1.8639   |
| C                                                          | 1.14945  | -4.11742 | 0.71176  | H  | 2.20098  | -0.21574 | 2.58858  |
| C                                                          | 2.15046  | -3.36759 | 1.38692  | F  | 3.31702  | -1.48774 | 5.8363   |
| C                                                          | 2.92706  | -2.41287 | 0.68428  | F  | 0.80183  | -2.27698 | 3.90791  |
| C                                                          | 2.77497  | -2.21131 | -0.72669 | F  | 2.67298  | -3.37643 | 4.65324  |
| C                                                          | 1.81588  | -3.03783 | -1.40986 | F  | 1.43559  | -0.38355 | 5.05216  |
| H                                                          | 0.22056  | -4.47884 | -1.23213 | F  | 1.20299  | -2.40935 | 6.19078  |
| H                                                          | 2.25139  | -3.45556 | 2.46337  | F  | 2.90641  | -1.35505 | 3.55345  |
| H                                                          | 3.58867  | -1.76057 | 1.24106  | P  | 2.05244  | -1.89075 | 4.92952  |
| H                                                          | 1.62324  | -2.85777 | -2.46223 | Ru | 0.71854  | -1.99681 | 0.265    |
| C                                                          | 3.63038  | -1.24949 | -1.52998 | Cl | -0.61343 | -0.78665 | -1.28715 |
| C                                                          | 4.78021  | -2.06057 | -2.17748 | C  | 0.91918  | -4.07313 | -0.6022  |
| C                                                          | 4.17699  | -0.0554  | -0.73442 | C  | 1.10793  | -4.16455 | 0.81895  |
| H                                                          | 5.46348  | -2.44875 | -1.41336 | C  | 2.13584  | -3.39443 | 1.41767  |
| H                                                          | 4.41237  | -2.90691 | -2.76803 | C  | 2.86094  | -2.46024 | 0.64361  |
| H                                                          | 5.35376  | -1.40921 | -2.8428  | C  | 2.65229  | -2.30575 | -0.76736 |
| H                                                          | 4.69189  | 0.62617  | -1.41631 | C  | 1.68214  | -3.18177 | -1.37287 |
| H                                                          | 3.38116  | 0.50191  | -0.23321 | H  | 0.11242  | -4.62642 | -1.07063 |
| H                                                          | 4.91164  | -0.36825 | 0.01796  | H  | 2.27611  | -3.41855 | 2.49024  |
| C                                                          | 0.262    | -5.08477 | 1.44369  | H  | 3.52764  | -1.79082 | 1.16929  |
| H                                                          | 0.66862  | -6.09793 | 1.33406  | H  | 1.43544  | -3.06045 | -2.41911 |
| H                                                          | 0.21051  | -4.86141 | 2.51173  | C  | 3.52206  | -1.3628  | -1.60806 |
| H                                                          | -0.7495  | -5.08996 | 1.02925  | C  | 4.75732  | -2.19773 | -2.03989 |
| H                                                          | 2.9916   | -0.86394 | -2.33483 | C  | 3.99675  | -0.14372 | -0.78937 |
| <b>IM1b</b>                                                |          |          |          | H  | 5.32077  | -2.55964 | -1.17367 |
| Sum of electronic and thermal Free Energies = -2324.102922 |          |          |          | H  | 4.46808  | -3.06303 | -2.64575 |
| Sum of electronic and thermal Enthalpies = -2324.007313    |          |          |          | H  | 5.42715  | -1.57459 | -2.64127 |
| C                                                          | -2.95035 | -2.6512  | 1.75648  | H  | 4.5375   | 0.54142  | -1.44876 |
| C                                                          | -1.76907 | -1.95212 | 2.02688  | H  | 3.15919  | 0.39515  | -0.33988 |

|   |          |          |          |
|---|----------|----------|----------|
| H | 4.68799  | -0.42583 | 0.01056  |
| C | 0.25954  | -5.07629 | 1.6605   |
| H | 0.70395  | -6.0794  | 1.66821  |
| H | 0.21739  | -4.72105 | 2.69245  |
| H | -0.75412 | -5.16505 | 1.26113  |
| H | 3.01129  | -1.01368 | -2.48106 |

**IM1c**

Sum of electronic and thermal Free Energies = -2324.103093

Sum of electronic and thermal Enthalpies = -2324.008225

|    |          |          |          |
|----|----------|----------|----------|
| F  | -3.98524 | 2.9381   | 1.23481  |
| F  | -6.13352 | 2.18179  | 0.8122   |
| F  | -5.68105 | 3.14539  | 2.84102  |
| F  | -5.38738 | 4.06517  | -0.24561 |
| F  | -4.92828 | 5.03329  | 1.77399  |
| F  | -7.1024  | 4.25557  | 1.33961  |
| C  | -1.61311 | -1.45106 | -1.08212 |
| C  | -1.53604 | -1.12924 | 0.2723   |
| C  | -2.48257 | -0.26739 | 0.85593  |
| C  | -3.53766 | 0.22562  | 0.07423  |
| C  | -3.61674 | -0.11454 | -1.27884 |
| C  | -2.65491 | -0.9409  | -1.86229 |
| H  | -0.86924 | -2.10741 | -1.52432 |
| H  | -0.73667 | -1.54547 | 0.88071  |
| H  | -4.29733 | 0.85634  | 0.51736  |
| H  | -4.44442 | 0.26611  | -1.86989 |
| H  | -2.72397 | -1.20132 | -2.91452 |
| C  | -2.39516 | 0.01007  | 2.31523  |
| C  | -2.48708 | -1.14737 | 3.27752  |
| H  | -2.62589 | -2.08474 | 2.73949  |
| H  | -1.59275 | -1.2068  | 3.90657  |
| H  | -3.33007 | -0.98736 | 3.95761  |
| N  | -2.24718 | 1.21282  | 2.77285  |
| O  | -2.18147 | 1.24297  | 4.15117  |
| H  | -2.32561 | 2.20178  | 4.36622  |
| Cl | -2.53232 | 4.13647  | 3.913    |
| P  | -5.62551 | 3.64477  | 1.31361  |
| C  | -1.1559  | 2.95555  | -0.33829 |
| C  | -0.25151 | 2.30364  | 0.52258  |
| C  | 0.31372  | 2.97398  | 1.66095  |
| C  | -0.08003 | 4.32082  | 1.87107  |
| C  | -0.9596  | 5.00451  | 0.96973  |
| C  | -1.50834 | 4.33879  | -0.14632 |
| H  | -1.6385  | 2.38863  | -1.12593 |
| H  | -0.05659 | 1.24728  | 0.37642  |

|    |          |         |          |
|----|----------|---------|----------|
| H  | 0.23373  | 4.82765 | 2.77664  |
| H  | -1.28103 | 6.00804 | 1.21401  |
| C  | 1.25955  | 2.27187 | 2.59648  |
| Ru | -1.90494 | 3.12009 | 1.78742  |
| C  | -2.47717 | 4.98693 | -1.11726 |
| C  | -3.07155 | 6.31432 | -0.63496 |
| C  | -1.76756 | 5.15451 | -2.48084 |
| H  | -3.60349 | 6.19258 | 0.30983  |
| H  | -2.30468 | 7.09151 | -0.53218 |
| H  | -3.79617 | 6.66878 | -1.37306 |
| H  | -1.38222 | 4.2062  | -2.86916 |
| H  | -2.47487 | 5.55372 | -3.21352 |
| H  | -0.92894 | 5.85569 | -2.40544 |
| H  | 1.20196  | 2.69211 | 3.60298  |
| H  | 1.03682  | 1.2039  | 2.65677  |
| H  | 2.29041  | 2.38193 | 2.23906  |
| H  | -3.30806 | 4.28461 | -1.24123 |

**IM1d**

Sum of electronic and thermal Free Energies = -1863.646536

Sum of electronic and thermal Enthalpies = -1863.557507

|    |          |          |          |
|----|----------|----------|----------|
| C  | -1.14454 | -2.20784 | 0.74754  |
| C  | -0.88565 | -1.52701 | 1.95514  |
| C  | -1.50683 | -0.26889 | 2.19563  |
| C  | -2.3956  | 0.25888  | 1.25313  |
| C  | -2.62111 | -0.42367 | 0.05938  |
| C  | -1.98442 | -1.64438 | -0.20658 |
| H  | -0.71601 | -3.19157 | 0.57886  |
| H  | -0.45546 | -2.06836 | 2.79383  |
| H  | -2.83582 | 1.23674  | 1.40595  |
| H  | -3.27874 | 0.01279  | -0.68648 |
| H  | -2.16369 | -2.15469 | -1.14831 |
| C  | -1.00963 | 0.57298  | 3.29603  |
| C  | -1.86952 | 1.45209  | 4.14114  |
| H  | -2.87794 | 1.52036  | 3.7325   |
| H  | -1.94056 | 1.02611  | 5.14878  |
| H  | -1.42896 | 2.44559  | 4.23486  |
| N  | 0.28298  | 0.52188  | 3.40139  |
| O  | 0.85522  | 1.33138  | 4.37479  |
| H  | 1.31069  | 2.00828  | 3.83099  |
| Ru | 1.43503  | -0.53249 | 2.04445  |
| C  | 2.6577   | -2.13507 | 0.9912   |
| C  | 2.38589  | -2.57664 | 2.3314   |
| C  | 2.73502  | -1.71696 | 3.4046   |
| C  | 3.37957  | -0.46846 | 3.15605  |

|                                                            |          |          |          |    |         |          |          |
|------------------------------------------------------------|----------|----------|----------|----|---------|----------|----------|
| C                                                          | 3.69958  | -0.04452 | 1.84002  | H  | 2.3421  | 1.01248  | 5.86905  |
| C                                                          | 3.26643  | -0.89343 | 0.76017  | H  | 2.68216 | -0.68223 | 6.15352  |
| H                                                          | 2.32521  | -2.7358  | 0.15236  | N  | 3.6273  | -0.06106 | 3.68322  |
| H                                                          | 2.48833  | -2.      | 4.42164  | O  | 2.26651 | -0.33161 | 3.70864  |
| H                                                          | 3.58218  | 0.1874   | 3.99324  | H  | 2.11332 | -0.85511 | 2.89166  |
| H                                                          | 3.37189  | -0.53352 | -0.25746 | F  | 6.22007 | -3.78372 | 3.1473   |
| C                                                          | 4.48469  | 1.2132   | 1.5233   | F  | 6.60774 | -2.24596 | 0.31955  |
| P                                                          | 0.73759  | 2.70968  | 0.62149  | F  | 7.60892 | -2.14857 | 2.36587  |
| F                                                          | -0.15556 | 2.62498  | -0.6983  | F  | 5.21101 | -3.89154 | 1.08277  |
| F                                                          | 0.86994  | 4.29095  | 0.62103  | F  | 7.53696 | -4.19667 | 1.23545  |
| F                                                          | -0.59425 | 2.72173  | 1.55505  | F  | 5.28574 | -1.86131 | 2.249    |
| F                                                          | 0.62875  | 0.92119  | 0.67049  | P  | 6.46289 | -3.11254 | 1.70334  |
| F                                                          | 1.6386   | 2.57919  | 2.02195  | Ru | 4.42376 | -0.00232 | 1.66847  |
| F                                                          | 2.09708  | 2.48604  | -0.22417 | C  | 5.62832 | 0.45612  | -0.19105 |
| H                                                          | 3.91327  | 1.76032  | 0.76761  | C  | 6.33525 | 1.0058   | 0.93537  |
| C                                                          | 1.75441  | -3.91448 | 2.59057  | C  | 5.62511 | 1.86576  | 1.808    |
| H                                                          | 1.07388  | -4.20884 | 1.78986  | C  | 4.25443 | 2.19664  | 1.56159  |
| H                                                          | 1.22028  | -3.93787 | 3.54259  | C  | 3.558   | 1.6776   | 0.44345  |
| H                                                          | 2.54642  | -4.67145 | 2.63956  | C  | 4.28601 | 0.78545  | -0.42524 |
| C                                                          | 4.71687  | 2.1369   | 2.72409  | H  | 6.10663 | -0.31064 | -0.78648 |
| H                                                          | 5.33485  | 1.66144  | 3.49457  | H  | 6.10995 | 2.22842  | 2.70691  |
| H                                                          | 5.24923  | 3.03232  | 2.39042  | H  | 3.72106 | 2.79335  | 2.29148  |
| H                                                          | 3.77707  | 2.46987  | 3.17033  | H  | 3.73832 | 0.259    | -1.19777 |
| C                                                          | 5.83532  | 0.78929  | 0.89187  | C  | 2.11248 | 2.0123   | 0.127    |
| H                                                          | 5.7042   | 0.17999  | -0.00773 | C  | 2.09196 | 3.10367  | -0.96706 |
| H                                                          | 6.39196  | 1.68566  | 0.60417  | C  | 1.27808 | 2.42557  | 1.34554  |
| H                                                          | 6.44795  | 0.22489  | 1.60298  | H  | 2.53368 | 4.03893  | -0.60467 |
| <b>IM1e</b>                                                |          |          |          | H  | 2.63838 | 2.79403  | -1.86374 |
| Sum of electronic and thermal Free Energies = -2804.420030 |          |          |          | H  | 1.05833 | 3.30909  | -1.26084 |
| Sum of electronic and thermal Enthalpies = -2804.311781    |          |          |          | H  | 0.23435 | 2.54516  | 1.04248  |
| C                                                          | 7.24335  | 2.02244  | 5.94592  | H  | 1.30749 | 1.66645  | 2.13116  |
| C                                                          | 5.89879  | 1.74437  | 5.70707  | H  | 1.60498 | 3.38557  | 1.76316  |
| C                                                          | 5.52596  | 0.55829  | 5.04833  | C  | 7.77599 | 0.66535  | 1.16557  |
| C                                                          | 6.5155   | -0.35942 | 4.66648  | H  | 8.38568 | 1.30202  | 0.51118  |
| C                                                          | 7.85976  | -0.08091 | 4.92297  | H  | 8.06965 | 0.85043  | 2.19973  |
| C                                                          | 8.2272   | 1.10781  | 5.55569  | H  | 7.97495 | -0.37775 | 0.92363  |
| H                                                          | 7.52239  | 2.94465  | 6.44707  | P  | 1.40903 | -2.03973 | 0.35348  |
| H                                                          | 5.13668  | 2.44999  | 6.02718  | F  | 2.76373 | -1.35467 | 1.41896  |
| H                                                          | 6.24251  | -1.28803 | 4.18473  | F  | 2.40116 | -3.25075 | 0.04893  |
| H                                                          | 8.60941  | -0.80527 | 4.62131  | F  | 2.08205 | -1.18875 | -0.86571 |
| H                                                          | 9.27355  | 1.31829  | 5.75708  | F  | 0.91396 | -2.74252 | 1.71415  |
| C                                                          | 4.08741  | 0.25857  | 4.85062  | F  | 0.61047 | -0.68786 | 0.7938   |
| C                                                          | 3.15527  | 0.29793  | 6.03392  | F  | 0.2115  | -2.58473 | -0.53906 |
| H                                                          | 3.69798  | 0.55277  | 6.94352  | H  | 1.66841 | 1.10448  | -0.28823 |

**IM1f**

Sum of electronic and thermal Free Energies = -1843.766418

Sum of electronic and thermal Enthalpies = -1843.681268

|    |          |          |          |
|----|----------|----------|----------|
| C  | -2.93291 | 0.08478  | -0.00906 |
| N  | -2.81289 | 1.01056  | 0.88196  |
| O  | -3.45306 | 2.2135   | 0.47819  |
| H  | -3.62202 | 2.71072  | 1.31221  |
| Cl | -3.27038 | 4.84462  | 1.70008  |
| C  | -1.18849 | 3.96774  | -2.31866 |
| C  | -0.66556 | 2.9557   | -1.48839 |
| C  | -0.13423 | 3.24906  | -0.18058 |
| C  | -0.21913 | 4.58048  | 0.26932  |
| C  | -0.81407 | 5.60035  | -0.54329 |
| C  | -1.28397 | 5.32629  | -1.85516 |
| H  | -1.63336 | 3.70387  | -3.27128 |
| H  | -0.69223 | 1.92446  | -1.82463 |
| H  | 0.06245  | 4.81858  | 1.28853  |
| H  | -0.96676 | 6.5815   | -0.11332 |
| C  | 0.44764  | 2.15932  | 0.67653  |
| Ru | -2.30019 | 4.00223  | -0.38328 |
| C  | -1.90222 | 6.37909  | -2.75783 |
| C  | -2.47124 | 7.59126  | -2.01002 |
| C  | -0.86555 | 6.80699  | -3.81903 |
| H  | -3.20271 | 7.28372  | -1.25845 |
| H  | -1.68486 | 8.18043  | -1.52377 |
| H  | -2.97518 | 8.25266  | -2.72072 |
| H  | -0.48008 | 5.95165  | -4.38399 |
| H  | -1.32487 | 7.49972  | -4.53106 |
| H  | -0.01312 | 7.31701  | -3.35563 |
| H  | 0.4959   | 2.46624  | 1.72348  |
| H  | -0.14891 | 1.24665  | 0.61824  |
| H  | 1.46564  | 1.92605  | 0.34091  |
| Cl | -4.42804 | 4.29201  | -1.48871 |
| C  | -3.64412 | 0.269    | -1.32493 |
| H  | -4.37545 | 1.07427  | -1.25293 |
| H  | -2.928   | 0.55545  | -2.10605 |
| H  | -4.13087 | -0.65614 | -1.64277 |
| C  | -2.29677 | -1.21683 | 0.3359   |
| C  | -2.07469 | -2.19252 | -0.64878 |
| C  | -1.90294 | -1.49485 | 1.65886  |
| C  | -1.4756  | -3.41053 | -0.32338 |
| H  | -2.36256 | -2.00483 | -1.67754 |
| C  | -1.3077  | -2.71022 | 1.97998  |
| H  | -2.08055 | -0.74988 | 2.42579  |

C

-1.09126 -3.67428 0.99052

H

-1.31244 -4.15264 -1.09921

H

-1.01741 -2.91024 3.00727

H

-0.63127 -4.62475 1.24481

H

-2.73875 5.88535 -3.26584

**IM1g**

Sum of electronic and thermal Free Energies = -1383.3369395

Sum of electronic and thermal Enthalpies = -1383.257613

|    |          |          |          |
|----|----------|----------|----------|
| C  | -4.82192 | -0.93147 | 1.23131  |
| C  | -3.50839 | -0.6459  | 1.59021  |
| C  | -3.06085 | 0.68631  | 1.63725  |
| C  | -3.95402 | 1.72856  | 1.32745  |
| C  | -5.26154 | 1.43481  | 0.94831  |
| C  | -5.69823 | 0.10798  | 0.90262  |
| H  | -5.17119 | -1.95995 | 1.22308  |
| H  | -2.83257 | -1.44228 | 1.87741  |
| H  | -3.62389 | 2.76276  | 1.35496  |
| H  | -5.94167 | 2.24363  | 0.69601  |
| H  | -6.72253 | -0.11659 | 0.62273  |
| C  | -1.67399 | 1.00566  | 2.01221  |
| C  | -1.34523 | 2.26011  | 2.77694  |
| H  | -2.22357 | 2.63251  | 3.30288  |
| H  | -0.54315 | 2.07078  | 3.49348  |
| H  | -0.99862 | 3.03931  | 2.0848   |
| N  | -0.74664 | 0.17941  | 1.64561  |
| O  | 0.6      | 0.50791  | 2.03458  |
| H  | 0.84801  | 1.25993  | 1.44293  |
| Ru | 0.38122  | -1.03799 | 0.32323  |
| Cl | 0.54745  | 1.04096  | -0.87064 |
| C  | -0.38491 | -2.65523 | -0.95119 |
| C  | -0.45003 | -3.19869 | 0.37444  |
| C  | 0.72057  | -3.13383 | 1.16745  |
| C  | 1.9252   | -2.58303 | 0.63989  |
| C  | 2.0415   | -2.16184 | -0.72063 |
| C  | 0.84782  | -2.19574 | -1.49379 |
| H  | -1.28661 | -2.59504 | -1.55075 |
| H  | 0.68435  | -3.43827 | 2.20796  |
| H  | 2.7707   | -2.45572 | 1.30705  |
| H  | 0.84799  | -1.74726 | -2.48149 |
| C  | 3.34031  | -1.65198 | -1.31901 |
| C  | 4.16375  | -2.85712 | -1.82797 |
| C  | 4.16421  | -0.7707  | -0.36653 |
| H  | 4.48001  | -3.49796 | -0.99639 |
| H  | 3.59922  | -3.47274 | -2.53713 |

|   |          |          |          |
|---|----------|----------|----------|
| H | 5.06408  | -2.49847 | -2.33537 |
| H | 5.04516  | -0.39367 | -0.8927  |
| H | 3.58502  | 0.09118  | -0.02231 |
| H | 4.52773  | -1.32616 | 0.50595  |
| C | -1.72643 | -3.78441 | 0.90413  |
| H | -1.74002 | -4.85879 | 0.68093  |
| H | -1.80748 | -3.67224 | 1.98808  |
| H | -2.60169 | -3.33848 | 0.42588  |
| H | 3.06239  | -1.03707 | -2.18368 |

**IM1h**

Sum of electronic and thermal Free Energies = -2324.092090

Sum of electronic and thermal Enthalpies = -2323.990741

|    |          |          |          |
|----|----------|----------|----------|
| C  | -6.68385 | -0.998   | 2.99763  |
| C  | -5.48283 | -0.39924 | 2.61864  |
| C  | -4.73618 | -0.92106 | 1.55051  |
| C  | -5.22077 | -2.04749 | 0.86373  |
| C  | -6.42517 | -2.63748 | 1.24026  |
| C  | -7.15938 | -2.11541 | 2.30882  |
| H  | -7.24769 | -0.58899 | 3.83009  |
| H  | -5.11319 | 0.45924  | 3.16913  |
| H  | -4.65578 | -2.4372  | 0.02225  |
| H  | -6.79751 | -3.50016 | 0.69338  |
| H  | -8.09973 | -2.57504 | 2.59942  |
| C  | -3.44102 | -0.29095 | 1.17559  |
| C  | -3.23481 | 1.18676  | 1.3452   |
| H  | -4.18936 | 1.7002   | 1.45432  |
| H  | -2.61319 | 1.37245  | 2.22494  |
| H  | -2.69645 | 1.58602  | 0.48485  |
| N  | -2.55131 | -1.11417 | 0.73523  |
| O  | -1.30818 | -0.40018 | 0.40306  |
| H  | -0.80507 | -0.36977 | 1.27069  |
| F  | 1.7288   | 0.6954   | 3.37925  |
| F  | -1.46235 | 0.24306  | 3.89796  |
| F  | 0.476    | -0.62336 | 4.7962   |
| F  | -0.20995 | 1.55081  | 2.48807  |
| F  | 0.14153  | 1.69424  | 4.79439  |
| F  | 0.11176  | -0.73634 | 2.50535  |
| P  | 0.14108  | 0.51513  | 3.70544  |
| Ru | -0.13165 | -1.66903 | -0.86854 |
| Cl | -0.8088  | -0.37075 | -2.66797 |
| C  | 0.34058  | -3.61706 | -1.78908 |
| C  | -0.42766 | -3.81965 | -0.58771 |
| C  | 0.10321  | -3.31848 | 0.64092  |
| C  | 1.28198  | -2.5462  | 0.65937  |

|   |          |          |          |
|---|----------|----------|----------|
| C | 1.98243  | -2.24369 | -0.55059 |
| C | 1.52439  | -2.85271 | -1.76959 |
| H | -0.06567 | -3.94913 | -2.73946 |
| H | -0.49016 | -3.3877  | 1.54589  |
| H | 1.55127  | -2.04233 | 1.57933  |
| H | 2.01802  | -2.60974 | -2.70392 |
| C | 3.19728  | -1.33319 | -0.53589 |
| C | 4.36533  | -2.06767 | 0.15727  |
| C | 2.92067  | 0.03978  | 0.1084   |
| H | 4.14491  | -2.25421 | 1.21274  |
| H | 4.58124  | -3.02497 | -0.32274 |
| H | 5.26844  | -1.45256 | 0.10819  |
| H | 3.8374   | 0.63825  | 0.08989  |
| H | 2.15255  | 0.58673  | -0.45309 |
| H | 2.59388  | -0.02641 | 1.15112  |
| C | -1.75005 | -4.53133 | -0.61972 |
| H | -1.60585 | -5.59288 | -0.38278 |
| H | -2.43256 | -4.102   | 0.11702  |
| H | -2.21279 | -4.46387 | -1.60724 |
| H | 3.4776   | -1.163   | -1.58297 |

**IM1i**

Sum of electronic and thermal Free Energies = -2324.093259

Sum of electronic and thermal Enthalpies = -2323.996119

|   |          |          |         |
|---|----------|----------|---------|
| F | -4.99092 | 4.87002  | 1.17221 |
| F | -6.48888 | 3.17429  | 0.60455 |
| F | -6.42304 | 3.9022   | 2.77758 |
| F | -6.83949 | 5.31325  | -0.1632 |
| F | -6.77301 | 6.05497  | 2.02723 |
| F | -8.29471 | 4.39145  | 1.44019 |
| C | -3.53633 | -2.4053  | 5.78714 |
| C | -3.94231 | -1.10656 | 5.47811 |
| C | -4.0498  | -0.69554 | 4.14025 |
| C | -3.7512  | -1.61822 | 3.12163 |
| C | -3.35177 | -2.91461 | 3.43401 |
| C | -3.24325 | -3.31307 | 4.7683  |
| H | -3.45258 | -2.70897 | 6.8265  |
| H | -4.15825 | -0.40758 | 6.28325 |
| H | -3.85684 | -1.30733 | 2.08765 |
| H | -3.137   | -3.61995 | 2.6339  |
| H | -2.9404  | -4.32857 | 5.01161 |
| C | -4.4576  | 0.68928  | 3.78301 |
| C | -5.46752 | 1.44995  | 4.60629 |
| H | -5.75686 | 0.88289  | 5.48879 |
| H | -5.06913 | 2.42247  | 4.91732 |



|                                                            |          |          |          |                                                            |          |          |          |
|------------------------------------------------------------|----------|----------|----------|------------------------------------------------------------|----------|----------|----------|
| H                                                          | -6.37701 | 1.63965  | 4.02639  | H                                                          | -6.15238 | -2.9761  | 2.12295  |
| N                                                          | -3.8914  | 1.1442   | 2.71707  | C                                                          | -1.8256  | 0.13812  | 2.78325  |
| O                                                          | -4.3331  | 2.40337  | 2.2834   | C                                                          | -1.80009 | 1.21926  | 3.83068  |
| H                                                          | -5.12542 | 2.7857   | 2.74109  | H                                                          | -2.55837 | 1.044    | 4.59287  |
| Cl                                                         | -3.05026 | 4.79993  | 3.74908  | H                                                          | -0.81543 | 1.30291  | 4.29585  |
| P                                                          | -6.7195  | 4.62553  | 1.29444  | H                                                          | -2.03569 | 2.18519  | 3.36466  |
| C                                                          | -2.64667 | 3.51265  | -0.66254 | N                                                          | -0.87034 | -0.10574 | 1.94871  |
| C                                                          | -2.05467 | 2.49941  | 0.11641  | O                                                          | 0.2522   | 0.84237  | 2.12271  |
| C                                                          | -1.1386  | 2.80605  | 1.18531  | H                                                          | -0.0726  | 1.73477  | 1.85586  |
| C                                                          | -0.842   | 4.17854  | 1.41339  | Ru                                                         | 1.8829   | 0.41691  | 0.78676  |
| C                                                          | -1.45722 | 5.21451  | 0.64851  | C                                                          | 2.34335  | -1.29415 | -0.52747 |
| C                                                          | -2.39551 | 4.89752  | -0.37695 | C                                                          | 1.91538  | -1.84348 | 0.71294  |
| H                                                          | -3.41565 | 3.25156  | -1.3811  | C                                                          | 2.5853   | -1.36518 | 1.88721  |
| H                                                          | -2.38265 | 1.47336  | -0.01017 | C                                                          | 3.63621  | -0.42083 | 1.81498  |
| H                                                          | -0.23651 | 4.45082  | 2.27056  | C                                                          | 4.09029  | 0.089    | 0.5477   |
| H                                                          | -1.29484 | 6.24404  | 0.93674  | C                                                          | 3.42223  | -0.36203 | -0.61791 |
| C                                                          | -0.56473 | 1.71339  | 2.0429   | H                                                          | 1.78449  | -1.52339 | -1.42782 |
| Ru                                                         | -3.00628 | 3.92514  | 1.52493  | H                                                          | 2.20955  | -1.65895 | 2.86226  |
| C                                                          | -3.17683 | 5.95639  | -1.13619 | H                                                          | 4.05695  | -0.01833 | 2.73052  |
| C                                                          | -3.41661 | 7.25483  | -0.35203 | H                                                          | 3.65806  | 0.08564  | -1.57707 |
| C                                                          | -2.46803 | 6.22598  | -2.48415 | C                                                          | 5.13936  | 1.15922  | 0.47925  |
| H                                                          | -3.93499 | 7.05651  | 0.5899   | P                                                          | 1.04118  | 3.25996  | -0.26571 |
| H                                                          | -2.48867 | 7.79889  | -0.14196 | F                                                          | 2.2693   | 3.07391  | -1.27566 |
| H                                                          | -4.04972 | 7.91473  | -0.95101 | F                                                          | 1.48236  | 4.70524  | 0.19174  |
| H                                                          | -2.30557 | 5.30718  | -3.05468 | F                                                          | 0.01762  | 3.68881  | -1.38904 |
| H                                                          | -3.07969 | 6.89698  | -3.09479 | F                                                          | 0.6579   | 1.57482  | -0.57164 |
| H                                                          | -1.49635 | 6.70445  | -2.32324 | F                                                          | -0.14201 | 3.19308  | 0.87586  |
| H                                                          | -0.14976 | 2.11705  | 2.96775  | F                                                          | 2.0775   | 2.56659  | 0.97888  |
| H                                                          | -1.34016 | 0.99007  | 2.3006   | H                                                          | 4.96976  | 1.82452  | -0.36986 |
| H                                                          | 0.23343  | 1.19364  | 1.50419  | H                                                          | 5.16201  | 1.75625  | 1.39361  |
| H                                                          | -4.16139 | 5.51804  | -1.34699 | H                                                          | 6.12357  | 0.69048  | 0.35756  |
| <b>IM1j</b>                                                |          |          |          | C                                                          | 0.79494  | -2.8577  | 0.83844  |
| Sum of electronic and thermal Free Energies = -1863.642480 |          |          |          | C                                                          | -0.17    | -2.87341 | -0.35303 |
| Sum of electronic and thermal Enthalpies = -1863.548297    |          |          |          | C                                                          | 1.42231  | -4.25114 | 1.07864  |
| C                                                          | -4.59205 | -1.85536 | 1.14446  | H                                                          | 0.31294  | -3.23125 | -1.26911 |
| C                                                          | -3.46864 | -1.04971 | 1.31506  | H                                                          | -0.9959  | -3.55695 | -0.13968 |
| C                                                          | -3.02385 | -0.72037 | 2.60755  | H                                                          | -0.5983  | -1.88387 | -0.53621 |
| C                                                          | -3.72147 | -1.2141  | 3.72344  | H                                                          | 0.62845  | -4.9852  | 1.2435   |
| C                                                          | -4.83456 | -2.03372 | 3.54532  | H                                                          | 2.00754  | -4.57607 | 0.2122   |
| C                                                          | -5.27455 | -2.35095 | 2.25781  | H                                                          | 2.0778   | -4.26402 | 1.95595  |
| H                                                          | -4.94281 | -2.08587 | 0.14251  | H                                                          | 0.22148  | -2.57641 | 1.72906  |
| H                                                          | -2.94864 | -0.64343 | 0.4538   | <b>IM1k</b>                                                |          |          |          |
| H                                                          | -3.38549 | -0.98328 | 4.72974  | Sum of electronic and thermal Free Energies = -2804.409140 |          |          |          |
| H                                                          | -5.3618  | -2.41992 | 4.41152  | Sum of electronic and thermal Enthalpies = -2804.299730    |          |          |          |

|    |          |          |          |                                               |              |          |          |
|----|----------|----------|----------|-----------------------------------------------|--------------|----------|----------|
| C  | 10.05718 | -2.61725 | 5.6848   | H                                             | 0.74763      | 1.24814  | 3.66077  |
| C  | 9.13449  | -1.87372 | 4.95011  | H                                             | 0.49505      | 0.54021  | 2.07034  |
| C  | 7.76095  | -2.00203 | 5.20997  | C                                             | 5.39073      | -0.99617 | -2.14591 |
| C  | 7.32887  | -2.88781 | 6.21023  | H                                             | 5.12416      | -0.43827 | -3.05238 |
| C  | 8.25632  | -3.62175 | 6.94523  | H                                             | 6.46894      | -0.94881 | -2.00451 |
| C  | 9.62259  | -3.48653 | 6.68658  | H                                             | 5.10344      | -2.03959 | -2.28834 |
| H  | 11.11662 | -2.5228  | 5.46604  | P                                             | 2.91753      | -3.86633 | 2.08793  |
| H  | 9.47855  | -1.23428 | 4.1451   | F                                             | 4.37084      | -3.01639 | 1.55446  |
| H  | 6.26673  | -2.98882 | 6.40468  | F                                             | 2.14117      | -3.12195 | 0.85642  |
| H  | 7.91268  | -4.29929 | 7.72132  | F                                             | 2.59367      | -2.48983 | 3.01577  |
| H  | 10.34446 | -4.06067 | 7.2603   | F                                             | 3.34127      | -5.06776 | 1.1253   |
| C  | 6.77595  | -1.208   | 4.42605  | F                                             | 3.79067      | -4.42717 | 3.30428  |
| C  | 7.12585  | 0.1992   | 4.02893  | F                                             | 1.56856      | -4.55146 | 2.59428  |
| H  | 7.56207  | 0.72033  | 4.88548  | H                                             | 3.02945      | 1.86168  | 3.16214  |
| H  | 7.86701  | 0.18183  | 3.2261   |                                               |              |          |          |
| H  | 6.24758  | 0.74382  | 3.68539  | <b>TS1b</b>                                   |              |          |          |
| N  | 5.68068  | -1.8327  | 4.17598  | Sum of electronic and thermal Free Energies = | -1383.305956 |          |          |
| O  | 4.70898  | -1.01402 | 3.45484  | Sum of electronic and thermal Enthalpies =    | -1383.229230 |          |          |
| H  | 3.91698  | -1.60056 | 3.52105  | Imaginary frequency=                          | -648.4522    |          |          |
| F  | 9.04426  | -0.974   | 1.66495  | C                                             | -2.97835     | -3.66542 | 2.71169  |
| F  | 7.19675  | -2.65411 | -0.39866 | C                                             | -2.18458     | -2.51343 | 2.60963  |
| F  | 7.92191  | -0.48867 | -0.25729 | C                                             | -1.27822     | -2.22516 | 3.6706   |
| F  | 8.34733  | -3.15537 | 1.52819  | C                                             | -1.19904     | -3.05475 | 4.79342  |
| F  | 9.50188  | -2.20893 | -0.28532 | C                                             | -2.01858     | -4.18384 | 4.87722  |
| F  | 6.76231  | -1.44528 | 1.55933  | C                                             | -2.89898     | -4.49259 | 3.83923  |
| P  | 8.21202  | -1.86774 | 0.58842  | H                                             | -3.65208     | -3.93661 | 1.90349  |
| Ru | 4.72745  | -0.90741 | 1.23812  | H                                             | -1.31989     | -2.75392 | 1.30321  |
| C  | 3.41782  | -0.88499 | -0.53401 | H                                             | -0.50906     | -2.82895 | 5.60045  |
| C  | 4.66779  | -0.39104 | -0.97853 | H                                             | -1.95955     | -4.828   | 5.7489   |
| C  | 5.23646  | 0.67732  | -0.2123  | H                                             | -3.5232      | -5.3791  | 3.90342  |
| C  | 4.54862  | 1.26699  | 0.87715  | C                                             | -0.44618     | -1.03227 | 3.48846  |
| C  | 3.2296   | 0.8346   | 1.24798  | C                                             | 0.66791      | -0.64213 | 4.4079   |
| C  | 2.707    | -0.28429 | 0.55011  | H                                             | 0.26151      | -0.25274 | 5.34659  |
| H  | 3.02259  | -1.80189 | -0.95569 | H                                             | 1.27614      | -1.51531 | 4.65048  |
| H  | 6.26612  | 0.95572  | -0.40048 | H                                             | 1.29598      | 0.12446  | 3.9616   |
| H  | 5.0479   | 2.0379   | 1.44928  | N                                             | -0.77491     | -0.35622 | 2.42699  |
| H  | 1.79468  | -0.75934 | 0.8789   | O                                             | -0.05197     | 0.8065   | 2.19175  |
| C  | 2.4254   | 1.56341  | 2.33084  | H                                             | -0.02658     | 0.87429  | 1.22376  |
| C  | 1.86524  | 2.83194  | 1.63015  | Ru                                            | -2.34899     | -0.93581 | 1.19555  |
| C  | 1.2462   | 0.71407  | 2.84708  | Cl                                            | -0.60337     | -2.46791 | 0.06729  |
| H  | 2.66789  | 3.49266  | 1.2868   | C                                             | -4.40616     | -1.32213 | 0.26355  |
| H  | 1.24106  | 2.574    | 0.7686   | C                                             | -3.63369     | -0.70452 | -0.74698 |
| H  | 1.2473   | 3.3926   | 2.33866  | C                                             | -3.04973     | 0.57965  | -0.47689 |
| H  | 1.57136  | -0.25708 | 3.22878  | C                                             | -3.20282     | 1.18199  | 0.77905  |
|    |          |          |          | C                                             | -3.95438     | 0.55442  | 1.83291  |

|   |          |          |          |
|---|----------|----------|----------|
| C | -4.54621 | -0.70488 | 1.53962  |
| H | -4.85392 | -2.2923  | 0.07949  |
| H | -2.44784 | 1.06062  | -1.24034 |
| H | -2.70337 | 2.12429  | 0.9767   |
| H | -5.09842 | -1.21859 | 2.31943  |
| C | -4.2624  | 1.25703  | 3.14573  |
| C | -5.48611 | 2.17608  | 2.92699  |
| C | -3.08815 | 2.03788  | 3.75288  |
| H | -5.25206 | 2.98192  | 2.22404  |
| H | -6.34481 | 1.62227  | 2.53655  |
| H | -5.78241 | 2.63479  | 3.87515  |
| H | -3.41281 | 2.51871  | 4.68147  |
| H | -2.24644 | 1.3815   | 3.9865   |
| H | -2.72626 | 2.83347  | 3.09096  |
| C | -3.43716 | -1.35722 | -2.08649 |
| H | -4.15427 | -0.93517 | -2.80125 |
| H | -2.4326  | -1.17677 | -2.4761  |
| H | -3.60259 | -2.43501 | -2.03697 |
| H | -4.55565 | 0.47866  | 3.86082  |

**TS1-a**

Sum of electronic and thermal Free Energies = -2324.066197

Sum of electronic and thermal Enthalpies = -2323.971414

Imaginary frequency= -662.4019

|    |          |          |         |
|----|----------|----------|---------|
| C  | -2.46542 | -4.05494 | 2.58671 |
| C  | -1.95978 | -2.75342 | 2.7253  |
| C  | -0.95123 | -2.53085 | 3.70567 |
| C  | -0.50241 | -3.57648 | 4.52145 |
| C  | -1.04322 | -4.85522 | 4.37518 |
| C  | -2.01642 | -5.09789 | 3.40522 |
| H  | -3.20789 | -4.2687  | 1.8219  |
| H  | -1.21525 | -2.46073 | 1.21827 |
| H  | 0.26265  | -3.40451 | 5.27174 |
| H  | -0.69427 | -5.6631  | 5.01118 |
| H  | -2.42622 | -6.09667 | 3.28352 |
| C  | -0.43642 | -1.16164 | 3.77147 |
| C  | 0.74854  | -0.71366 | 4.57151 |
| H  | 0.48726  | 0.15458  | 5.18323 |
| H  | 1.13096  | -1.50664 | 5.21301 |
| H  | 1.54742  | -0.38815 | 3.89674 |
| N  | -1.08411 | -0.31959 | 3.01487 |
| O  | -0.57759 | 0.94649  | 3.0539  |
| H  | -1.04799 | 1.5425   | 2.41798 |
| Ru | -2.70028 | -0.98521 | 1.8567  |
| Cl | -0.85807 | -1.68851 | 0.11541 |

|   |          |          |          |
|---|----------|----------|----------|
| C | -4.03614 | 0.94892  | 1.88237  |
| C | -4.35166 | 0.07936  | 2.98773  |
| C | -4.7231  | -1.26243 | 2.68961  |
| C | -4.78917 | -1.73585 | 1.34237  |
| C | -4.40662 | -0.89467 | 0.27986  |
| C | -4.04303 | 0.46815  | 0.57263  |
| H | -3.6787  | 1.95674  | 2.05154  |
| H | -4.94662 | -1.94051 | 3.50615  |
| H | -5.06306 | -2.76691 | 1.14823  |
| H | -3.686   | 1.12114  | -0.21339 |
| C | -4.3818  | -1.38584 | -1.14173 |
| C | -4.39097 | 0.56442  | 4.43061  |
| H | -3.92373 | -0.21885 | 5.04192  |
| P | -1.35897 | 3.31663  | 0.37168  |
| F | -1.739   | 3.01499  | 2.00708  |
| F | -1.24299 | 1.67506  | 0.21094  |
| F | -1.02642 | 3.52698  | -1.18813 |
| F | -2.9706  | 3.19093  | 0.04639  |
| F | -1.54051 | 4.89398  | 0.6428   |
| F | 0.20099  | 3.3768   | 0.79039  |
| C | -3.63495 | 1.87671  | 4.66654  |
| H | -4.09279 | 2.70916  | 4.1233   |
| H | -3.66809 | 2.1282   | 5.73084  |
| H | -2.58886 | 1.80992  | 4.36105  |
| C | -5.8635  | 0.70203  | 4.87836  |
| H | -6.41694 | -0.23572 | 4.76973  |
| H | -5.9085  | 1.00047  | 5.93002  |
| H | -6.37807 | 1.46913  | 4.28992  |
| H | -4.37049 | -2.47703 | -1.19246 |
| H | -3.50642 | -1.00241 | -1.67096 |
| H | -5.27291 | -1.02692 | -1.66983 |

**TS1-b**

Sum of electronic and thermal Free Energies = -2324.055889

Sum of electronic and thermal Enthalpies = -2323.964631

Imaginary frequency= -86.2212

|   |          |          |         |
|---|----------|----------|---------|
| C | -2.52933 | -1.51829 | 5.19322 |
| C | -2.26147 | -0.53346 | 6.14468 |
| C | -0.93593 | -0.24059 | 6.46898 |
| C | 0.15174  | -0.88882 | 5.80927 |
| C | -0.16134 | -1.89246 | 4.86875 |
| C | -1.4836  | -2.20686 | 4.56679 |
| H | -3.55896 | -1.76217 | 4.94963 |
| H | -3.07947 | -0.041   | 6.65999 |
| H | 0.64104  | -2.39625 | 4.34032 |

|              |          |          |          |                                               |              |          |          |
|--------------|----------|----------|----------|-----------------------------------------------|--------------|----------|----------|
| H            | -1.70729 | -2.97498 | 3.83238  | Sum of electronic and thermal Free Energies = | -3264.740328 |          |          |
| C            | -0.57878 | 0.63243  | 7.5833   | Sum of electronic and thermal Enthalpies =    | -3264.626312 |          |          |
| C            | -1.50247 | 1.64383  | 8.18127  | Imaginary frequency=                          | -478.2259    |          |          |
| H            | -2.16386 | 1.13537  | 8.89321  | C                                             | -2.45908     | -3.56541 | 2.22416  |
| H            | -0.93963 | 2.40484  | 8.71998  | C                                             | -1.85463     | -2.30018 | 2.24253  |
| H            | -2.11151 | 2.11061  | 7.40394  | C                                             | -0.99273     | -1.99268 | 3.3317   |
| N            | 0.60186  | 0.36837  | 8.06055  | C                                             | -0.79216     | -2.90409 | 4.37353  |
| O            | 1.00726  | 1.102    | 9.17393  | C                                             | -1.43565     | -4.14308 | 4.34438  |
| H            | 0.88896  | 0.44426  | 9.89213  | C                                             | -2.2599      | -4.47635 | 3.26853  |
| F            | -1.56658 | -1.28414 | 9.64893  | H                                             | -3.08777     | -3.85069 | 1.38435  |
| F            | 0.01317  | -2.36291 | 8.33312  | H                                             | -0.99535     | -2.16846 | 0.86554  |
| F            | 0.6108   | -1.30817 | 10.3771  | H                                             | -0.15121     | -2.64656 | 5.2112   |
| F            | 0.64637  | -3.59176 | 10.19891 | H                                             | -1.28646     | -4.84801 | 5.15733  |
| F            | -1.56134 | -3.59558 | 9.49405  | H                                             | -2.75024     | -5.44608 | 3.24056  |
| F            | -0.98582 | -2.56079 | 11.51472 | C                                             | -0.35852     | -0.67016 | 3.28365  |
| Cl           | 1.7607   | 1.35664  | 4.63219  | C                                             | 0.74116      | -0.22976 | 4.19282  |
| C            | 3.15011  | -3.02194 | 7.23281  | H                                             | 0.33375      | 0.2539   | 5.08526  |
| C            | 3.4454   | -2.21344 | 6.11855  | H                                             | 1.35247      | -1.08295 | 4.49231  |
| C            | 3.61113  | -0.80606 | 6.35898  | H                                             | 1.36636      | 0.5076   | 3.68593  |
| C            | 3.66082  | -0.29264 | 7.68259  | N                                             | -0.84314     | 0.08326  | 2.34086  |
| C            | 3.52112  | -1.14789 | 8.82613  | O                                             | -0.32956     | 1.34913  | 2.16402  |
| C            | 3.16677  | -2.49064 | 8.56576  | H                                             | -0.48281     | 1.86436  | 2.99943  |
| H            | 2.87594  | -4.06185 | 7.08734  | Ru                                            | -2.26508     | -0.6216  | 1.00512  |
| H            | 3.6399   | -0.10276 | 5.53286  | Cl                                            | -0.2246      | -1.70747 | -0.2749  |
| H            | 3.7656   | 0.77837  | 7.82205  | C                                             | -3.24626     | 1.24579  | -0.08548 |
| H            | 2.85011  | -3.12552 | 9.38617  | C                                             | -3.61881     | 1.2486   | 1.28014  |
| C            | 3.64587  | -0.62095 | 10.22819 | C                                             | -4.20053     | 0.05461  | 1.8198   |
| Ru           | 1.69888  | -1.23287 | 7.3982   | C                                             | -4.46647     | -1.06597 | 0.97673  |
| P            | -0.51929 | -2.48146 | 9.98615  | C                                             | -4.10141     | -1.07152 | -0.39357 |
| C            | 3.58705  | -2.83028 | 4.73501  | C                                             | -3.44515     | 0.09679  | -0.88636 |
| C            | 3.41239  | -1.84864 | 3.5671   | H                                             | -2.77193     | 2.1099   | -0.53382 |
| C            | 4.98053  | -3.49915 | 4.65818  | H                                             | -4.45629     | 0.01454  | 2.87336  |
| H            | 4.21401  | -1.10473 | 3.54678  | H                                             | -4.90713     | -1.95728 | 1.4138   |
| H            | 3.45369  | -2.39742 | 2.62123  | H                                             | -3.07876     | 0.1231   | -1.90541 |
| H            | 2.47359  | -1.29503 | 3.60802  | C                                             | -4.46314     | -2.24955 | -1.28714 |
| H            | 5.11192  | -3.97799 | 3.68279  | C                                             | -5.88867     | -2.03758 | -1.84418 |
| H            | 5.76961  | -2.74894 | 4.77213  | C                                             | -3.46739     | -2.48982 | -2.43032 |
| H            | 5.11641  | -4.25878 | 5.4337   | H                                             | -6.62594     | -1.94407 | -1.03892 |
| H            | 2.99008  | -1.16569 | 10.91033 | H                                             | -5.92171     | -1.13207 | -2.45504 |
| H            | 3.39898  | 0.44265  | 10.27034 | H                                             | -6.17648     | -2.89058 | -2.46924 |
| H            | 4.67992  | -0.74055 | 10.57434 | H                                             | -2.44829     | -2.62024 | -2.05499 |
| H            | 1.00239  | -0.07432 | 5.45154  | H                                             | -3.75094     | -3.39595 | -2.97527 |
| H            | 2.83465  | -3.62661 | 4.65334  | H                                             | -3.46888     | -1.66059 | -3.13944 |
| <b>TS1-c</b> |          |          |          | C                                             | -3.39004     | 2.44217  | 2.15874  |

|   |          |          |          |   |          |          |         |
|---|----------|----------|----------|---|----------|----------|---------|
| H | -4.28556 | 3.07638  | 2.13217  | C | -1.69302 | 0.18665  | 3.1844  |
| H | -3.2103  | 2.1647   | 3.19749  | C | -2.90541 | 0.69662  | 3.76681 |
| H | -2.54477 | 3.03933  | 1.81016  | C | -2.77001 | 1.78149  | 4.67632 |
| P | -1.36754 | 2.80498  | 5.6497   | H | -1.43308 | 3.16349  | 5.70234 |
| F | -1.88629 | 1.34168  | 5.06839  | H | 0.42273  | 0.44416  | 2.92549 |
| F | -0.60302 | 3.03402  | 4.16404  | H | -1.73579 | -0.58222 | 2.42523 |
| F | -0.80976 | 4.24276  | 6.13247  | H | -3.65184 | 2.22586  | 5.11946 |
| F | -2.70638 | 3.49908  | 5.03458  | C | -4.26573 | 0.02484  | 3.51579 |
| F | -2.10546 | 2.53147  | 7.06154  | C | -4.5347  | -0.88292 | 4.74543 |
| F | -0.00351 | 2.07558  | 6.18996  | C | -4.25212 | -0.85005 | 2.24454 |
| P | -4.11998 | 1.69108  | -4.14528 | H | -3.7409  | -1.6254  | 4.87823 |
| F | -3.0285  | 0.4489   | -3.96415 | H | -4.61132 | -0.29785 | 5.66779 |
| F | -4.8134  | 0.88605  | -5.37511 | H | -5.47855 | -1.42068 | 4.60702 |
| F | -3.09856 | 2.43707  | -5.16218 | H | -5.25222 | -1.26277 | 2.08061 |
| F | -5.12087 | 0.9063   | -3.07979 | H | -3.97219 | -0.27664 | 1.35573 |
| F | -5.19974 | 2.89405  | -4.27268 | H | -3.5706  | -1.70099 | 2.34032 |
| F | -3.41079 | 2.44704  | -2.8645  | C | 1.03953  | 2.43932  | 4.69298 |
| H | -4.47757 | -3.14282 | -0.64717 | H | 1.58206  | 1.82209  | 5.41913 |

#### TS1-d

Sum of electronic and thermal Free Energies = -2804.379400

Sum of electronic and thermal Enthalpies = -2804.272572

Imaginary frequency= -826.0212

|    |          |         |          |
|----|----------|---------|----------|
| C  | -3.02115 | 5.15204 | 4.10925  |
| C  | -2.89848 | 4.35792 | 2.9501   |
| C  | -4.00547 | 4.35619 | 2.04302  |
| C  | -5.15399 | 5.10763 | 2.29158  |
| C  | -5.23878 | 5.86886 | 3.46028  |
| C  | -4.17583 | 5.89699 | 4.36366  |
| H  | -2.16773 | 5.25225 | 4.76982  |
| H  | -5.98905 | 5.08852 | 1.59742  |
| H  | -6.13459 | 6.45291 | 3.65533  |
| H  | -4.23285 | 6.51547 | 5.25343  |
| C  | -3.8849  | 3.46896 | 0.88161  |
| C  | -4.71141 | 3.59716 | -0.35892 |
| H  | -5.66985 | 3.07662 | -0.24226 |
| H  | -4.91888 | 4.64924 | -0.56135 |
| H  | -4.18736 | 3.15458 | -1.20744 |
| N  | -2.98539 | 2.54663 | 1.039    |
| O  | -2.86308 | 1.63837 | 0.01662  |
| H  | -1.91328 | 1.36989 | 0.03659  |
| Ru | -1.82896 | 2.45918 | 2.78689  |
| C  | -1.48639 | 2.3171  | 5.02787  |
| C  | -0.31122 | 1.83739 | 4.4265   |
| C  | -0.44901 | 0.75201 | 3.48893  |

|   |          |         |          |
|---|----------|---------|----------|
| C | 1.62225  | 2.47417 | 3.77099  |
| H | 0.95274  | 3.45395 | 5.08023  |
| P | 0.7282   | 2.27408 | 0.22734  |
| F | -0.23117 | 3.12235 | 1.41684  |
| F | 1.65951  | 3.55904 | 0.12886  |
| F | 1.59549  | 1.6776  | 1.47128  |
| F | -0.33481 | 0.97426 | 0.44742  |
| F | 1.55482  | 1.42358 | -0.84427 |
| F | -0.30145 | 2.84056 | -0.879   |
| H | -1.77065 | 4.87297 | 2.36438  |
| P | 0.20829  | 6.56433 | 2.786    |
| F | -1.08525 | 7.24059 | 3.49155  |
| F | 0.08085  | 5.32393 | 3.86447  |
| F | -1.01822 | 5.60635 | 1.79026  |
| F | 0.13703  | 7.65159 | 1.61128  |
| F | 1.32834  | 5.73919 | 1.99797  |
| F | 1.24838  | 7.37202 | 3.68932  |
| H | -5.05865 | 0.73828 | 3.43105  |

#### TS1-e

Sum of electronic and thermal Free Energies = -2324.050740

Sum of electronic and thermal Enthalpies = -2323.957406

Imaginary frequency= -969.2488

|   |          |          |         |
|---|----------|----------|---------|
| C | -5.00997 | -1.67856 | 3.73579 |
| C | -4.27979 | -0.51886 | 3.40173 |
| C | -3.25678 | -0.13957 | 4.32568 |
| C | -2.96421 | -0.90561 | 5.46219 |

|    |          |          |          |                                               |              |          |          |
|----|----------|----------|----------|-----------------------------------------------|--------------|----------|----------|
| C  | -3.69433 | -2.05918 | 5.73828  | H                                             | -5.07754     | 2.34268  | -1.3036  |
| C  | -4.72475 | -2.43371 | 4.87668  | H                                             | -5.98259     | 0.83218  | -1.47775 |
| H  | -5.76675 | -2.04639 | 3.05525  | H                                             | -6.8328      | 2.39475  | -1.59007 |
| H  | -4.10112 | -0.86398 | 1.95112  | H                                             | -7.31327     | 0.80464  | 5.02604  |
| H  | -2.17851 | -0.59015 | 6.14222  | <b>TS1-f</b>                                  |              |          |          |
| H  | -3.46401 | -2.65469 | 6.61656  | Sum of electronic and thermal Free Energies = | -1863.605250 |          |          |
| H  | -5.30245 | -3.33192 | 5.077    | Sum of electronic and thermal Enthalpies =    | -1863.512595 |          |          |
| C  | -2.59189 | 1.13982  | 4.09274  | Imaginary frequency=                          | -857.6381    |          |          |
| C  | -1.32443 | 1.5635   | 4.7692   | C                                             | 0.61708      | -1.65469 | 3.6507   |
| H  | -1.50652 | 1.76332  | 5.8322   | C                                             | -0.0739      | -0.77988 | 2.79709  |
| H  | -0.5832  | 0.7606   | 4.70519  | C                                             | 0.67849      | -0.0153  | 1.85689  |
| H  | -0.92957 | 2.46731  | 4.30723  | C                                             | 2.06798      | -0.11823 | 1.80047  |
| N  | -3.22349 | 1.87687  | 3.23493  | C                                             | 2.72962      | -0.98763 | 2.67803  |
| O  | -2.66719 | 3.10462  | 2.89784  | C                                             | 2.01139      | -1.76176 | 3.59004  |
| H  | -2.59952 | 3.00515  | 1.91876  | H                                             | 0.06014      | -2.29162 | 4.33151  |
| Ru | -4.83239 | 1.19569  | 2.14555  | H                                             | -1.08441     | -1.5033  | 2.13925  |
| C  | -6.81045 | 0.68912  | 1.03264  | H                                             | 2.64317      | 0.46579  | 1.0888   |
| C  | -6.28812 | 1.83757  | 0.39519  | H                                             | 3.81118      | -1.06804 | 2.63399  |
| C  | -5.98195 | 2.9804   | 1.19897  | H                                             | 2.53271      | -2.45167 | 4.24691  |
| C  | -6.20613 | 2.96546  | 2.59259  | C                                             | -0.10599     | 0.84933  | 0.96138  |
| C  | -6.76494 | 1.8287   | 3.25422  | C                                             | 0.4458       | 1.52535  | -0.25371 |
| C  | -7.01529 | 0.68915  | 2.43963  | H                                             | 0.84641      | 2.51083  | 0.00996  |
| H  | -6.97378 | -0.21734 | 0.46719  | H                                             | 1.25408      | 0.93587  | -0.68719 |
| H  | -5.52148 | 3.84724  | 0.73886  | H                                             | -0.33569     | 1.67513  | -0.99823 |
| H  | -5.91406 | 3.83302  | 3.17486  | N                                             | -1.34779     | 0.95524  | 1.32727  |
| H  | -7.36485 | -0.22332 | 2.90994  | O                                             | -2.14051     | 1.75951  | 0.52105  |
| P  | -4.90524 | -2.71743 | 0.043    | H                                             | -3.04068     | 1.4311   | 0.66818  |
| F  | -5.15829 | -1.41144 | -0.87745 | Ru                                            | -2.05866     | 0.0324   | 3.06882  |
| F  | -3.84199 | -1.60437 | 1.0901   | C                                             | -2.42952     | -0.47013 | 5.27056  |
| F  | -4.57495 | -3.84553 | 1.13785  | C                                             | -3.68273     | -0.63229 | 4.64909  |
| F  | -6.16942 | -2.23639 | 0.9749   | C                                             | -4.20231     | 0.47207  | 3.88565  |
| F  | -3.54871 | -3.02963 | -0.73991 | C                                             | -3.50283     | 1.68138  | 3.79119  |
| F  | -5.81808 | -3.66805 | -0.85393 | C                                             | -2.21104     | 1.86028  | 4.40204  |
| Cl | -3.01346 | 1.29363  | 0.47109  | C                                             | -1.69315     | 0.74556  | 5.12169  |
| C  | -6.02653 | 1.84818  | -1.08313 | H                                             | -1.99344     | -1.29619 | 5.82102  |
| C  | -7.15411 | 1.84806  | 4.72381  | H                                             | -5.14612     | 0.35236  | 3.36425  |
| C  | -6.07675 | 2.43957  | 5.6461   | H                                             | -3.91998     | 2.47998  | 3.19018  |
| C  | -8.49606 | 2.59999  | 4.88131  | H                                             | -0.70708     | 0.80793  | 5.56311  |
| H  | -5.86889 | 3.49143  | 5.41541  | C                                             | -1.50309     | 3.22366  | 4.407    |
| H  | -6.41688 | 2.39758  | 6.68613  | C                                             | -2.0152      | 3.96003  | 5.67533  |
| H  | -5.14032 | 1.88002  | 5.56716  | C                                             | -1.85674     | 4.07128  | 3.16631  |
| H  | -8.83319 | 2.56658  | 5.92278  | H                                             | -3.10263     | 4.08531  | 5.65758  |
| H  | -8.38805 | 3.65461  | 4.59609  | H                                             | -1.74886     | 3.42137  | 6.59008  |
| H  | -9.28188 | 2.16169  | 4.25681  | H                                             | -1.56576     | 4.9562   | 5.72632  |

|                                               |              |          |          |    |          |          |          |
|-----------------------------------------------|--------------|----------|----------|----|----------|----------|----------|
| H                                             | -1.2893      | 5.00529  | 3.19801  | H  | -4.84281 | -0.22218 | -0.15118 |
| H                                             | -1.61462     | 3.56061  | 2.23035  | H  | -5.70771 | 3.27302  | 2.18776  |
| H                                             | -2.91486     | 4.35151  | 3.14173  | H  | -6.40345 | 1.84292  | 4.06621  |
| C                                             | -4.47041     | -1.90421 | 4.76057  | H  | -5.51849 | -1.64977 | 1.73275  |
| H                                             | -5.37358     | -1.71693 | 5.34585  | C  | -2.92879 | -2.68997 | 2.40702  |
| H                                             | -4.77198     | -2.27545 | 3.77807  | C  | -3.20843 | -4.04513 | 1.98087  |
| H                                             | -3.89693     | -2.68453 | 5.25564  | C  | -3.42124 | -4.33578 | 0.619    |
| P                                             | -2.36875     | -4.09074 | 1.97122  | C  | -3.27813 | -5.09552 | 2.92209  |
| F                                             | -2.21465     | -3.58574 | 3.49545  | C  | -3.70061 | -5.63856 | 0.21255  |
| F                                             | -2.1197      | -1.7628  | 1.68223  | H  | -3.35832 | -3.5292  | -0.10499 |
| F                                             | -3.90106     | -3.6302  | 2.03562  | C  | -3.5565  | -6.39358 | 2.50653  |
| F                                             | -2.45454     | -4.02933 | 0.39235  | H  | -3.10973 | -4.87845 | 3.97203  |
| F                                             | -2.52642     | -5.62994 | 2.22955  | C  | -3.7697  | -6.67017 | 1.15195  |
| F                                             | -0.7799      | -3.98571 | 1.85368  | H  | -3.86205 | -5.84976 | -0.84062 |
| H                                             | -0.43941     | 3.12276  | 4.46447  | H  | -3.60469 | -7.19463 | 3.23894  |
| <b>TS2a</b>                                   |              |          |          | H  | -3.98537 | -7.68554 | 0.8317   |
| Sum of electronic and thermal Free Energies = | -1998.387662 |          |          | C  | -2.80194 | -2.01071 | 3.5372   |
| Sum of electronic and thermal Enthalpies =    | -1998.273473 |          |          | C  | -3.10673 | -2.24675 | 4.87231  |
| Imaginary frequency=                          | -276.0065    |          |          | C  | -3.39468 | -2.47997 | 6.0367   |
| C                                             | -2.57193     | 0.61474  | 4.33643  | C  | -3.74137 | -2.76655 | 7.38473  |
| C                                             | -1.92651     | -0.33052 | 3.5178   | C  | -3.34531 | -1.90397 | 8.4293   |
| C                                             | -0.50886     | -0.46472 | 3.63783  | C  | -4.49275 | -3.91829 | 7.70378  |
| C                                             | 0.19801      | 0.28062  | 4.58918  | C  | -3.69355 | -2.18857 | 9.74662  |
| C                                             | -0.47032     | 1.19812  | 5.39929  | H  | -2.76566 | -1.01838 | 8.18908  |
| C                                             | -1.84986     | 1.38151  | 5.24867  | C  | -4.83253 | -4.19464 | 9.02472  |
| H                                             | -3.64776     | 0.72946  | 4.26459  | H  | -4.80385 | -4.5837  | 6.90469  |
| H                                             | 1.27605      | 0.17647  | 4.66939  | C  | -4.43648 | -3.33269 | 10.05108 |
| H                                             | 0.08303      | 1.77871  | 6.13111  | H  | -3.38233 | -1.51586 | 10.54079 |
| H                                             | -2.3681      | 2.11592  | 5.85945  | H  | -5.41094 | -5.085   | 9.25473  |
| C                                             | 0.14697      | -1.2657  | 2.60849  | H  | -4.70517 | -3.55096 | 11.08047 |
| C                                             | 1.5657       | -1.74788 | 2.64683  | C  | -4.79157 | 2.56976  | -0.27181 |
| H                                             | 2.18777      | -1.17697 | 1.94864  | C  | -5.10074 | 1.97982  | -1.6581  |
| H                                             | 1.98363      | -1.65705 | 3.6498   | C  | -3.30945 | 2.98931  | -0.17796 |
| H                                             | 1.61514      | -2.7941  | 2.33473  | H  | -4.44977 | 1.13017  | -1.88506 |
| N                                             | -0.61284     | -1.47211 | 1.57164  | H  | -6.14074 | 1.64553  | -1.73045 |
| O                                             | -0.04388     | -2.18171 | 0.53949  | H  | -4.93475 | 2.73608  | -2.43305 |
| H                                             | -0.67734     | -2.02323 | -0.19889 | H  | -3.06242 | 3.70443  | -0.9706  |
| Ru                                            | -2.55784     | -0.94021 | 1.54388  | H  | -3.08882 | 3.46017  | 0.78475  |
| C                                             | -5.11695     | 0.2435   | 0.78779  | H  | -2.65556 | 2.11967  | -0.29435 |
| C                                             | -5.17766     | 1.64977  | 0.88167  | Cl | -2.43892 | -0.96984 | -0.896   |
| C                                             | -5.63632     | 2.192    | 2.08608  | H  | -5.39705 | 3.47965  | -0.15672 |
| C                                             | -6.03204     | 1.37953  | 3.15412  | C  | -6.4811  | -0.90544 | 4.21773  |
| C                                             | -5.98207     | -0.0149  | 3.06469  | H  | -5.88223 | -0.73191 | 5.0873   |
| C                                             | -5.50772     | -0.57067 | 1.8615   | H  | -7.50189 | -0.66923 | 4.43473  |

|   |         |          |        |
|---|---------|----------|--------|
| H | -6.4059 | -1.93392 | 3.9323 |
|---|---------|----------|--------|

**TS2-a**

Sum of electronic and thermal Free Energies = -1537.938283

Sum of electronic and thermal Enthalpies = -1537.831990

Imaginary frequency= -411.6598

|    |          |          |          |
|----|----------|----------|----------|
| C  | -3.30651 | 0.79719  | 0.34773  |
| C  | -2.7591  | -0.37889 | -0.20136 |
| C  | -2.78934 | -1.55138 | 0.6354   |
| C  | -3.31788 | -1.51157 | 1.9549   |
| C  | -3.82925 | -0.33186 | 2.45046  |
| C  | -3.82929 | 0.82028  | 1.63594  |
| H  | -3.35004 | 1.70282  | -0.24839 |
| H  | -3.32041 | -2.4026  | 2.57449  |
| H  | -4.2369  | -0.28779 | 3.45481  |
| H  | -4.25476 | 1.74256  | 2.02285  |
| C  | -2.24106 | -2.72775 | 0.0561   |
| C  | -1.8913  | -3.99215 | 0.76665  |
| H  | -2.44326 | -4.09782 | 1.69991  |
| H  | -0.81977 | -3.97931 | 1.00743  |
| H  | -2.05979 | -4.86095 | 0.12748  |
| N  | -1.97033 | -2.59599 | -1.26452 |
| O  | -1.17282 | -3.6398  | -1.75704 |
| H  | -1.0981  | -3.43579 | -2.70275 |
| Ru | -1.88417 | -0.59974 | -2.00564 |
| C  | -1.25298 | 1.56674  | -2.24995 |
| C  | -0.1203  | 0.94733  | -1.62061 |
| C  | 0.42413  | -0.17597 | -2.27237 |
| C  | -0.01784 | -0.57713 | -3.57786 |
| C  | -1.07044 | 0.07498  | -4.22619 |
| C  | -1.73965 | 1.11887  | -3.49353 |
| H  | -1.74606 | 2.39679  | -1.75653 |
| H  | 1.23057  | -0.73103 | -1.80802 |
| H  | 0.48357  | -1.40768 | -4.06661 |
| H  | -2.61364 | 1.59288  | -3.92631 |
| C  | -1.50209 | -0.29047 | -5.62171 |
| C  | 0.41663  | 1.51836  | -0.31846 |
| H  | -0.45741 | 1.80982  | 0.27819  |
| C  | -3.67814 | -2.63734 | -2.23377 |
| C  | -4.15206 | -3.98726 | -2.33936 |
| C  | -4.64208 | -4.70912 | -1.22792 |
| C  | -4.21116 | -4.57628 | -3.62442 |
| C  | -5.16293 | -5.98633 | -1.39842 |
| H  | -4.63122 | -4.25005 | -0.24346 |
| C  | -4.76493 | -5.84286 | -3.79064 |

|   |          |          |          |
|---|----------|----------|----------|
| H | -3.85063 | -4.01659 | -4.48314 |
|---|----------|----------|----------|

|   |          |          |          |
|---|----------|----------|----------|
| C | -5.22877 | -6.55327 | -2.67903 |
| H | -5.53699 | -6.53676 | -0.53928 |
| H | -4.82923 | -6.27801 | -4.78474 |
| H | -5.6488  | -7.54591 | -2.80871 |
| C | -3.70048 | -1.39487 | -2.65259 |
| C | -4.70387 | -0.77032 | -3.40125 |
| C | -5.57059 | -0.21503 | -4.0577  |
| C | -6.63476 | 0.34578  | -4.82026 |
| C | -6.53683 | 1.64135  | -5.36799 |
| C | -7.80963 | -0.40486 | -5.03897 |
| C | -7.58509 | 2.16636  | -6.1183  |
| H | -5.63723 | 2.22506  | -5.19958 |
| C | -8.8543  | 0.13099  | -5.78549 |
| H | -7.88754 | -1.40127 | -4.6158  |
| C | -8.74444 | 1.41464  | -6.32833 |
| H | -7.50037 | 3.16378  | -6.53922 |
| H | -9.75549 | -0.45275 | -5.94621 |
| H | -9.56059 | 1.82831  | -6.91285 |
| C | 1.24091  | 0.52759  | 0.51358  |
| H | 2.17328  | 0.24768  | 0.01017  |
| H | 1.5159   | 0.98849  | 1.46674  |
| H | 0.67689  | -0.38506 | 0.73289  |
| C | 1.22871  | 2.79742  | -0.6209  |
| H | 0.63632  | 3.53708  | -1.16648 |
| H | 1.56385  | 3.25859  | 0.3114   |
| H | 2.11345  | 2.56619  | -1.2207  |
| H | -1.41316 | -1.36552 | -5.80506 |
| H | -0.85921 | 0.21976  | -6.34985 |
| H | -2.53363 | 0.01235  | -5.81545 |

**TS2-b**

Sum of electronic and thermal Free Energies = -1537.942323

Sum of electronic and thermal Enthalpies = -1537.836416

Imaginary frequency= -442.6686

|   |          |          |          |
|---|----------|----------|----------|
| C | -4.06573 | 0.88673  | -0.0218  |
| C | -3.37021 | -0.25751 | -0.46647 |
| C | -3.48723 | -1.43868 | 0.35447  |
| C | -4.26894 | -1.44142 | 1.54434  |
| C | -4.92879 | -0.29753 | 1.93256  |
| C | -4.82527 | 0.86743  | 1.14091  |
| H | -4.03458 | 1.8003   | -0.60695 |
| H | -4.34513 | -2.33925 | 2.14869  |
| H | -5.52713 | -0.28774 | 2.83745  |
| H | -5.36001 | 1.76358  | 1.44495  |



|    |          |          |          |
|----|----------|----------|----------|
| C  | -2.76623 | -2.57046 | -0.09801 |
| C  | -2.58481 | -3.86873 | 0.60581  |
| H  | -2.94142 | -4.68094 | -0.03952 |
| H  | -3.1134  | -3.89809 | 1.5566   |
| H  | -1.52009 | -4.05784 | 0.77997  |
| N  | -2.20598 | -2.39395 | -1.32695 |
| O  | -1.21363 | -3.34911 | -1.60399 |
| H  | -0.99052 | -3.17329 | -2.53137 |
| Ru | -2.2109  | -0.43003 | -2.09465 |
| C  | -1.74013 | 1.80725  | -2.3622  |
| C  | -0.67343 | 1.34045  | -1.52355 |
| C  | 0.08379  | 0.26057  | -2.01045 |
| C  | -0.08994 | -0.23686 | -3.34408 |
| C  | -1.07468 | 0.27371  | -4.19277 |
| C  | -1.95926 | 1.26543  | -3.64215 |
| H  | -2.38105 | 2.60728  | -2.008   |
| H  | 0.85667  | -0.17968 | -1.39149 |
| H  | 0.56978  | -1.02356 | -3.69892 |
| H  | -2.77906 | 1.63665  | -4.24678 |
| C  | -1.24051 | -0.19051 | -5.61392 |
| C  | -0.4178  | 2.01661  | -0.18739 |
| H  | -1.39762 | 2.32623  | 0.19824  |
| C  | -3.73181 | -1.45582 | -3.02282 |
| C  | -4.66038 | -1.00554 | -4.07343 |
| C  | -5.28019 | 0.25453  | -3.97638 |
| C  | -4.95923 | -1.82353 | -5.1807  |
| C  | -6.18124 | 0.67773  | -4.95155 |
| H  | -5.0699  | 0.88124  | -3.1157  |
| C  | -5.84634 | -1.38736 | -6.16328 |
| H  | -4.48907 | -2.79847 | -5.26782 |
| C  | -6.46104 | -0.13764 | -6.05154 |
| H  | -6.66515 | 1.64529  | -4.85441 |
| H  | -6.06113 | -2.02591 | -7.01519 |
| H  | -7.15505 | 0.19801  | -6.81597 |
| C  | -3.65653 | -2.6999  | -2.57224 |
| C  | -4.08634 | -3.98618 | -2.52678 |
| C  | -4.44739 | -5.16106 | -2.4873  |
| C  | -4.90876 | -6.49987 | -2.45106 |
| C  | -6.09478 | -6.82327 | -1.754   |
| C  | -4.19395 | -7.52226 | -3.11426 |
| C  | -6.54986 | -8.13658 | -1.72666 |
| H  | -6.64424 | -6.03568 | -1.24921 |
| C  | -4.6565  | -8.83277 | -3.07541 |
| H  | -3.28523 | -7.27169 | -3.65229 |

|   |          |           |          |
|---|----------|-----------|----------|
| C | -5.83253 | -9.14085  | -2.38387 |
| H | -7.46318 | -8.38098  | -1.19305 |
| H | -4.10458 | -9.61588  | -3.58458 |
| H | -6.19154 | -10.16531 | -2.35859 |
| H | -0.67734 | -1.10661  | -5.80543 |
| H | -0.87407 | 0.57866   | -6.30384 |
| H | -2.29226 | -0.37163  | -5.85227 |
| C | 0.23097  | 1.10736   | 0.86445  |
| H | 1.25737  | 0.83625   | 0.59394  |
| H | 0.28115  | 1.63116   | 1.82318  |
| H | -0.34432 | 0.1879    | 1.01071  |
| C | 0.42217  | 3.29347   | -0.41505 |
| H | -0.05411 | 3.97226   | -1.12943 |
| H | 0.54918  | 3.83325   | 0.52799  |
| H | 1.41725  | 3.04346   | -0.79825 |

### TS2-c

Sum of electronic and thermal Free Energies = -1843.712703

Sum of electronic and thermal Enthalpies = -1843.629027

Imaginary frequency= -165.7574

|    |          |          |          |
|----|----------|----------|----------|
| C  | -3.29439 | -3.2406  | 3.05322  |
| C  | -2.3508  | -2.2292  | 2.8429   |
| C  | -1.29649 | -2.11404 | 3.7831   |
| C  | -1.21326 | -2.93112 | 4.92026  |
| C  | -2.18665 | -3.9041  | 5.12153  |
| C  | -3.21583 | -4.05829 | 4.18479  |
| H  | -4.09038 | -3.41851 | 2.33659  |
| H  | -0.39498 | -2.81802 | 5.62552  |
| H  | -2.13878 | -4.55115 | 5.99186  |
| H  | -3.9639  | -4.83264 | 4.3342   |
| C  | -0.29983 | -1.1056  | 3.39845  |
| C  | 1.03292  | -0.95832 | 4.0677   |
| H  | 0.91086  | -0.49685 | 5.05503  |
| H  | 1.46711  | -1.95004 | 4.21935  |
| H  | 1.70607  | -0.35569 | 3.46256  |
| N  | -0.76517 | -0.41987 | 2.40746  |
| Ru | -2.24188 | -0.88629 | 1.27962  |
| Cl | -0.88544 | -2.56576 | 0.23855  |
| C  | -4.21819 | -1.30833 | 0.09505  |
| C  | -3.4605  | -0.57662 | -0.87717 |
| C  | -2.96917 | 0.68205  | -0.50314 |
| C  | -3.20872 | 1.20175  | 0.80212  |
| C  | -4.0814  | 0.56169  | 1.72001  |
| C  | -4.55934 | -0.72126 | 1.33462  |
| H  | -4.5698  | -2.30575 | -0.14382 |

|                                                            |          |          |          |   |          |          |          |
|------------------------------------------------------------|----------|----------|----------|---|----------|----------|----------|
| H                                                          | -2.30048 | 1.24317  | -1.14762 | C | -5.06959 | -0.56699 | 4.07581  |
| H                                                          | -2.70489 | 2.13048  | 1.04915  | C | -4.41168 | -1.02124 | 2.90508  |
| H                                                          | -5.16261 | -1.28745 | 2.03677  | C | -3.41695 | -0.22266 | 2.29277  |
| C                                                          | -4.53286 | 1.19863  | 3.02349  | C | -3.06919 | 1.07401  | 2.76706  |
| C                                                          | -5.77936 | 2.07171  | 2.76281  | C | -3.66709 | 1.48141  | 3.97627  |
| C                                                          | -3.43435 | 2.0042   | 3.7328   | H | -5.05142 | 1.00273  | 5.56778  |
| H                                                          | -5.53712 | 2.90952  | 2.10007  | H | -4.63083 | -1.9971  | 2.48421  |
| H                                                          | -6.58531 | 1.49533  | 2.29734  | H | -2.90393 | -0.63223 | 1.43129  |
| H                                                          | -6.15766 | 2.48396  | 3.70367  | H | -3.39524 | 2.43328  | 4.42216  |
| H                                                          | -3.81015 | 2.37894  | 4.68982  | C | -2.1232  | 2.00826  | 2.02612  |
| H                                                          | -2.55391 | 1.38598  | 3.92965  | C | -2.95261 | 3.07643  | 1.27666  |
| H                                                          | -3.11883 | 2.87152  | 3.14405  | C | -1.15595 | 1.29856  | 1.06745  |
| C                                                          | -3.1307  | -1.1968  | -2.20371 | H | -3.58985 | 2.61228  | 0.51777  |
| H                                                          | -2.70165 | -0.46106 | -2.8865  | H | -3.59445 | 3.64765  | 1.95382  |
| H                                                          | -2.39565 | -1.99644 | -2.05185 | H | -2.28474 | 3.77751  | 0.77078  |
| H                                                          | -4.02267 | -1.63353 | -2.66415 | H | -0.43446 | 2.01956  | 0.67551  |
| H                                                          | -4.83152 | 0.37907  | 3.68988  | H | -0.60644 | 0.49331  | 1.56065  |
| O                                                          | 0.61321  | 0.90637  | 1.97003  | H | -1.68192 | 0.87301  | 0.20713  |
| Cl                                                         | -0.30972 | 2.70157  | -0.00585 | C | -6.18046 | -1.35845 | 4.71168  |
| H                                                          | 0.39923  | 1.575    | 2.64212  | H | -7.13068 | -1.1161  | 4.22216  |
| H                                                          | 0.27564  | 1.41198  | 1.10105  | H | -6.01629 | -2.4332  | 4.60411  |
| <b>TS3a</b>                                                |          |          |          | H | -6.28225 | -1.12078 | 5.77311  |
| Sum of electronic and thermal Free Energies = -1998.755597 |          |          |          | C | -2.79101 | -1.85003 | 6.10271  |
| Sum of electronic and thermal Enthalpies = -1998.644477    |          |          |          | C | -3.18837 | -3.1281  | 6.5548   |
| Imaginary frequency= -543.3362                             |          |          |          | C | -3.18319 | -3.42197 | 7.94831  |
| C                                                          | -0.42443 | 0.03145  | 8.29735  | C | -3.57174 | -4.13456 | 5.62658  |
| C                                                          | -0.75949 | -0.58884 | 7.081    | C | -3.56741 | -4.67597 | 8.3918   |
| C                                                          | 0.3006   | -1.14718 | 6.31221  | H | -2.88843 | -2.64974 | 8.6517   |
| C                                                          | 1.62092  | -1.09253 | 6.8054   | C | -3.94286 | -5.39051 | 6.08741  |
| C                                                          | 1.92085  | -0.4684  | 8.00837  | H | -3.52208 | -3.92867 | 4.55978  |
| C                                                          | 0.88818  | 0.10017  | 8.7546   | C | -3.947   | -5.65814 | 7.46207  |
| H                                                          | -1.22004 | 0.45692  | 8.89684  | H | -3.57119 | -4.90257 | 9.45307  |
| H                                                          | 2.42919  | -1.51073 | 6.21729  | H | -4.21794 | -6.16555 | 5.3791   |
| H                                                          | 2.94885  | -0.41755 | 8.35273  | H | -4.24012 | -6.64255 | 7.8158   |
| H                                                          | 1.10161  | 0.59211  | 9.69835  | C | -2.21617 | -0.66847 | 6.71702  |
| C                                                          | 0.10463  | -1.76569 | 4.98005  | C | -3.13892 | 0.08561  | 7.51546  |
| C                                                          | 1.0613   | -2.82659 | 4.48259  | C | -3.9571  | 0.67567  | 8.20008  |
| H                                                          | 1.57096  | -3.30348 | 5.32017  | C | -4.91658 | 1.36065  | 9.00324  |
| H                                                          | 0.51205  | -3.59486 | 3.93238  | C | -4.67059 | 2.67518  | 9.45081  |
| H                                                          | 1.8261   | -2.39038 | 3.82699  | C | -6.12301 | 0.72488  | 9.36234  |
| N                                                          | -0.91585 | -1.37131 | 4.30254  | C | -5.61183 | 3.33242  | 10.23687 |
| O                                                          | -0.77967 | -1.93787 | 2.52749  | H | -3.74241 | 3.16695  | 9.17835  |
| Ru                                                         | -2.69199 | -0.71103 | 4.58552  | C | -7.05812 | 1.39255  | 10.14646 |
| C                                                          | -4.63106 | 0.66533  | 4.62658  | H | -6.3113  | -0.29089 | 9.02783  |

|    |          |          |          |
|----|----------|----------|----------|
| C  | -6.80567 | 2.69545  | 10.58541 |
| H  | -5.4144  | 4.3438   | 10.57923 |
| H  | -7.98363 | 0.89549  | 10.41961 |
| H  | -7.53642 | 3.21221  | 11.19882 |
| H  | -1.5279  | -2.82111 | 2.39936  |
| Cl | -2.58455 | -3.99573 | 2.17063  |
| H  | 0.10373  | -2.27404 | 2.29246  |
| H  | -1.52904 | 2.52493  | 2.79087  |

**IM5a**

Sum of electronic and thermal Free Energies = -1922.407456

Sum of electronic and thermal Enthalpies = -1922.29798

|    |             |             |            |
|----|-------------|-------------|------------|
| C  | -0.45382100 | -2.04790500 | 8.48511300 |
| C  | -0.70358900 | -1.45364500 | 7.24491500 |
| C  | 0.37806500  | -1.02852700 | 6.44624500 |
| C  | 1.68404100  | -1.20949700 | 6.92379200 |
| C  | 1.92392400  | -1.81593100 | 8.15544200 |
| C  | 0.85225600  | -2.23630000 | 8.93989900 |
| H  | -1.28473200 | -2.36539000 | 9.10611900 |
| H  | 2.52564400  | -0.88478600 | 6.32302700 |
| H  | 2.94388400  | -1.95700100 | 8.49817800 |
| H  | 1.02570200  | -2.70704300 | 9.90236000 |
| C  | 0.14132100  | -0.39739400 | 5.11994000 |
| C  | 1.24984300  | 0.43043100  | 4.48977700 |
| H  | 2.09217100  | -0.21299400 | 4.21483800 |
| H  | 0.88103400  | 0.91284100  | 3.58470400 |
| H  | 1.61435900  | 1.19116900  | 5.18711400 |
| N  | -0.93470200 | -0.50158000 | 4.45064000 |
| Ru | -2.57232000 | -1.53282900 | 4.72585100 |
| C  | -4.91955800 | -0.66915400 | 4.61540900 |
| C  | -5.14478900 | -1.78114800 | 3.76895900 |
| C  | -4.46307100 | -1.78636600 | 2.53906300 |
| C  | -3.68287700 | -0.69423400 | 2.12603600 |
| C  | -3.53772200 | 0.45790300  | 2.91787900 |
| C  | -4.12649800 | 0.42734800  | 4.20228200 |
| H  | -5.41093800 | -0.62345600 | 5.58231400 |
| H  | -4.54786300 | -2.65086100 | 1.88733300 |
| H  | -3.17246400 | -0.75026100 | 1.16956200 |
| H  | -4.01227600 | 1.26739700  | 4.87541500 |
| C  | -2.71255000 | 1.62717000  | 2.40756300 |
| C  | -3.38277700 | 2.25424100  | 1.16427900 |
| C  | -2.41901000 | 2.69967000  | 3.46352200 |
| H  | -3.55417000 | 1.52034200  | 0.37166300 |
| H  | -4.34798700 | 2.70116600  | 1.42488700 |
| H  | -2.74489000 | 3.04342900  | 0.75624600 |

|    |             |             |             |
|----|-------------|-------------|-------------|
| H  | -1.91409200 | 2.28064200  | 4.33850600  |
| H  | -1.76597700 | 3.46539000  | 3.03573200  |
| H  | -3.33359700 | 3.20531800  | 3.79415200  |
| C  | -6.11107300 | -2.87477300 | 4.14295600  |
| H  | -7.12029300 | -2.61286200 | 3.80329000  |
| H  | -5.84447500 | -3.82415200 | 3.67192300  |
| H  | -6.15762900 | -3.02437200 | 5.22420800  |
| C  | -2.89706800 | -2.37579800 | 6.38394800  |
| C  | -3.49675400 | -3.52835100 | 6.95409000  |
| C  | -3.81382100 | -3.54849200 | 8.33957400  |
| C  | -3.78647100 | -4.66577600 | 6.15657200  |
| C  | -4.41219900 | -4.66700000 | 8.89848500  |
| H  | -3.61237800 | -2.67063500 | 8.94478100  |
| C  | -4.35747800 | -5.79011400 | 6.73683300  |
| H  | -3.50490300 | -4.65432100 | 5.10972600  |
| C  | -4.67613900 | -5.78921600 | 8.10032300  |
| H  | -4.66816700 | -4.67768500 | 9.95289000  |
| H  | -4.55413100 | -6.67085100 | 6.13436900  |
| H  | -5.13043000 | -6.66886800 | 8.54648900  |
| C  | -2.14587100 | -1.23895100 | 6.83398600  |
| C  | -2.80114100 | -0.10071300 | 7.37814800  |
| C  | -3.32301400 | 0.87831600  | 7.88906400  |
| C  | -3.90949100 | 2.02753600  | 8.48522000  |
| C  | -3.09067000 | 3.08885400  | 8.92816900  |
| C  | -5.30860600 | 2.12021200  | 8.64628800  |
| C  | -3.66370200 | 4.21248100  | 9.51417900  |
| H  | -2.01473800 | 3.01603700  | 8.80824000  |
| C  | -5.86997200 | 3.24907800  | 9.23348200  |
| H  | -5.93982400 | 1.30185100  | 8.31448900  |
| C  | -5.05091700 | 4.29579500  | 9.66760100  |
| H  | -3.02919400 | 5.02498600  | 9.85385400  |
| H  | -6.94649800 | 3.31413500  | 9.35635100  |
| H  | -5.49315200 | 5.17450900  | 10.12670800 |
| Cl | -1.32575500 | -3.39968900 | 3.98082500  |
| H  | -1.75173900 | 1.19550600  | 2.09346900  |

**IM1-p**

Sum of electronic and thermal Free Energies = -1958.273088

Sum of electronic and thermal Enthalpies = -1958.185376

|   |             |             |             |
|---|-------------|-------------|-------------|
| C | -1.59462600 | -2.03086900 | -0.17823600 |
| C | -1.68201500 | -1.41717500 | 1.07930700  |
| C | -2.54581900 | -0.33541800 | 1.28908000  |
| C | -3.35835800 | 0.11859300  | 0.23535100  |
| C | -3.27403400 | -0.50746000 | -1.00583600 |
| C | -2.39665800 | -1.57349000 | -1.23123700 |

|    |             |             |             |
|----|-------------|-------------|-------------|
| H  | -1.05790600 | -1.80441900 | 1.87882100  |
| H  | -4.03486400 | 0.95069600  | 0.39879000  |
| H  | -3.91059500 | -0.16782000 | -1.81829000 |
| C  | -2.63879500 | 0.24673300  | 2.65377000  |
| C  | -2.91808800 | -0.67693800 | 3.81415900  |
| H  | -3.00131500 | -1.70983900 | 3.47701400  |
| H  | -2.13736000 | -0.59435100 | 4.57726900  |
| H  | -3.85255100 | -0.37714600 | 4.29969000  |
| N  | -2.51247000 | 1.51876600  | 2.86894300  |
| O  | -2.68108000 | 1.82446600  | 4.20112200  |
| H  | -2.66631800 | 2.81821900  | 4.22160600  |
| Cl | -2.40774800 | 4.66181000  | 3.57556400  |
| C  | -1.41802500 | 2.93276700  | -0.55075300 |
| C  | -0.57992600 | 2.10923700  | 0.22633200  |
| C  | 0.22050500  | 2.64869600  | 1.29264300  |
| C  | 0.11489900  | 4.03143600  | 1.54266700  |
| C  | -0.72881100 | 4.87348100  | 0.74147000  |
| C  | -1.49619200 | 4.35385900  | -0.31999200 |
| H  | -2.06500600 | 2.47771000  | -1.29153100 |
| H  | -0.58487300 | 1.03926300  | 0.05750000  |
| H  | 0.61617800  | 4.46132000  | 2.40224800  |
| H  | -0.84130000 | 5.91000100  | 1.03086100  |
| C  | 1.10115500  | 1.75617600  | 2.12406200  |
| Ru | -1.97947200 | 3.22436800  | 1.60059000  |
| C  | -2.42249700 | 5.19556500  | -1.17815800 |
| C  | -2.86521500 | 6.50715900  | -0.51889500 |
| C  | -1.75884400 | 5.44716300  | -2.54912600 |
| H  | -3.32273000 | 6.32011800  | 0.45589300  |
| H  | -2.02984400 | 7.20631800  | -0.39528900 |
| H  | -3.60748800 | 7.00125200  | -1.15294400 |
| H  | -1.47853700 | 4.51248700  | -3.04630700 |
| H  | -2.44953100 | 5.98363000  | -3.20718700 |
| H  | -0.85411600 | 6.05622000  | -2.44210800 |
| H  | 1.27953300  | 2.18661600  | 3.11231000  |
| H  | 0.65198000  | 0.76809800  | 2.25190500  |
| H  | 2.07178300  | 1.61935000  | 1.63192300  |
| Cl | -4.36475800 | 3.36343300  | 1.12219500  |
| H  | -2.35711000 | -2.04054200 | -2.20806200 |
| O  | -0.70508600 | -3.06148100 | -0.26775100 |
| C  | -0.58706500 | -3.74209900 | -1.50823100 |
| H  | 0.16350900  | -4.51873800 | -1.35488200 |
| H  | -1.53445900 | -4.20946400 | -1.80533000 |
| H  | -0.25212400 | -3.07016300 | -2.30900100 |
| H  | -3.32206900 | 4.58796000  | -1.33146100 |

### IM1a-p

Sum of electronic and thermal Free Energies = -1497.828354

Sum of electronic and thermal Enthalpies = -1497.741571

|    |          |          |          |
|----|----------|----------|----------|
| C  | -2.78907 | -2.5745  | 1.93201  |
| C  | -1.64993 | -1.79956 | 2.17329  |
| C  | -1.61969 | -0.42518 | 1.85791  |
| C  | -2.77279 | 0.16263  | 1.29615  |
| C  | -3.8909  | -0.60148 | 1.03079  |
| C  | -3.91482 | -1.98045 | 1.34602  |
| H  | -2.80202 | -3.61488 | 2.23405  |
| H  | -0.8249  | -2.23579 | 2.73137  |
| H  | -2.77043 | 1.21149  | 1.01519  |
| H  | -4.77248 | -0.16681 | 0.57161  |
| C  | -0.39366 | 0.35132  | 2.0714   |
| C  | -0.42019 | 1.72401  | 2.68686  |
| H  | -1.41301 | 2.1609   | 2.58289  |
| H  | -0.2094  | 1.67817  | 3.76256  |
| H  | 0.29672  | 2.40236  | 2.21157  |
| N  | 0.70818  | -0.23727 | 1.71301  |
| O  | 1.93272  | 0.3437   | 2.00981  |
| H  | 1.78246  | 1.1008   | 2.60233  |
| Ru | 0.81055  | -1.9653  | 0.51524  |
| Cl | -0.35574 | -0.75692 | -1.15682 |
| C  | 0.9938   | -4.09878 | -0.1993  |
| C  | 1.27558  | -4.10005 | 1.21237  |
| C  | 2.29779  | -3.2461  | 1.69284  |
| C  | 2.96398  | -2.35439 | 0.80789  |
| C  | 2.68378  | -2.33311 | -0.59622 |
| C  | 1.69701  | -3.26123 | -1.07895 |
| H  | 0.1764   | -4.70347 | -0.57722 |
| H  | 2.50741  | -3.20147 | 2.75599  |
| H  | 3.6438   | -1.62053 | 1.22193  |
| H  | 1.39566  | -3.21226 | -2.11932 |
| C  | 3.39062  | -1.41536 | -1.57786 |
| C  | 4.42518  | -2.24242 | -2.3753  |
| C  | 4.04156  | -0.1855  | -0.93244 |
| H  | 5.21037  | -2.63356 | -1.71907 |
| H  | 3.96379  | -3.08664 | -2.89686 |
| H  | 4.9007   | -1.6061  | -3.1274  |
| H  | 4.43248  | 0.46919  | -1.71651 |
| H  | 3.32446  | 0.38828  | -0.33876 |
| H  | 4.88813  | -0.45874 | -0.29114 |
| C  | 0.50783  | -5.00437 | 2.1352   |
| H  | 0.94967  | -6.00794 | 2.10995  |

|   |          |          |          |
|---|----------|----------|----------|
| H | 0.54126  | -4.6526  | 3.16895  |
| H | -0.5353  | -5.09812 | 1.82295  |
| O | -5.06796 | -2.61341 | 1.06739  |
| C | -5.19756 | -4.00068 | 1.38177  |
| H | -5.07898 | -4.17452 | 2.45758  |
| H | -6.20636 | -4.27814 | 1.07873  |
| H | -4.47062 | -4.60222 | 0.82371  |
| H | 2.62064  | -1.06595 | -2.27603 |

**TS1-p**

Sum of electronic and thermal Free Energies = -1958.222914

Sum of electronic and thermal Enthalpies = -1958.136313

Imaginary frequency= -298.4286

|    |          |          |          |
|----|----------|----------|----------|
| C  | -2.03375 | 0.33238  | 4.44171  |
| C  | -2.11617 | 0.3603   | 5.83303  |
| C  | -0.96433 | 0.23969  | 6.61039  |
| C  | 0.32246  | 0.14514  | 5.9883   |
| C  | 0.37511  | 0.10097  | 4.5865   |
| C  | -0.78637 | 0.18505  | 3.81128  |
| H  | -2.94256 | 0.415    | 3.85792  |
| H  | -3.0957  | 0.43395  | 6.29467  |
| H  | 1.32688  | 0.05641  | 4.06743  |
| C  | -0.97753 | 0.09745  | 8.05534  |
| C  | -2.1065  | 0.48372  | 8.9614   |
| H  | -2.9748  | 0.81268  | 8.39425  |
| H  | -2.38464 | -0.35247 | 9.60765  |
| H  | -1.79117 | 1.30632  | 9.6106   |
| N  | 0.1142   | -0.44018 | 8.51907  |
| O  | 0.12645  | -0.60722 | 9.90425  |
| H  | 0.7649   | -1.32461 | 10.02804 |
| Cl | 1.65668  | 2.6815   | 6.80688  |
| C  | 3.20849  | -2.63201 | 7.90423  |
| C  | 3.36469  | -2.43318 | 6.48702  |
| C  | 3.55887  | -1.11717 | 6.03396  |
| C  | 3.61218  | -0.02082 | 6.9501   |
| C  | 3.53806  | -0.21565 | 8.35157  |
| C  | 3.31337  | -1.55721 | 8.80747  |
| H  | 2.97459  | -3.62461 | 8.2718   |
| H  | 3.61039  | -0.92218 | 4.96833  |
| H  | 3.66154  | 0.99413  | 6.56939  |
| H  | 3.19764  | -1.7508  | 9.86869  |
| C  | 3.74799  | 0.96915  | 9.28134  |
| Ru | 1.63579  | -1.09491 | 7.2899   |
| C  | 3.27556  | -3.59881 | 5.54417  |
| H  | 3.22466  | 1.8122   | 8.81474  |

|    |          |          |          |
|----|----------|----------|----------|
| H  | 1.07052  | 1.06866  | 6.44309  |
| Cl | 0.07823  | -2.90916 | 6.74511  |
| O  | -0.60935 | 0.13647  | 2.4634   |
| C  | -1.75248 | 0.22518  | 1.6244   |
| H  | -1.38025 | 0.1541   | 0.6016   |
| H  | -2.45439 | -0.59746 | 1.81079  |
| H  | -2.27389 | 1.1822   | 1.75249  |
| H  | 3.13672  | -3.26341 | 4.51399  |
| H  | 2.43266  | -4.24221 | 5.81034  |
| H  | 4.20107  | -4.18805 | 5.5937   |
| C  | 3.1929   | 0.7796   | 10.69845 |
| H  | 3.72319  | -0.00833 | 11.24832 |
| H  | 3.32441  | 1.70552  | 11.26585 |
| H  | 2.12556  | 0.54815  | 10.68745 |
| C  | 5.25497  | 1.30421  | 9.33232  |
| H  | 5.65607  | 1.51443  | 8.33674  |
| H  | 5.41919  | 2.18906  | 9.95516  |
| H  | 5.83119  | 0.47683  | 9.76366  |

**IM2-p**

Sum of electronic and thermal Free Energies = -1497.451186

Sum of electronic and thermal Enthalpies = -1497.368641

|    |          |          |          |
|----|----------|----------|----------|
| C  | -3.01375 | -3.64836 | 2.44733  |
| C  | -2.31904 | -2.43851 | 2.5648   |
| C  | -1.46527 | -2.28687 | 3.69354  |
| C  | -1.34668 | -3.29008 | 4.66884  |
| C  | -2.07064 | -4.46945 | 4.54299  |
| C  | -2.89497 | -4.64301 | 3.42384  |
| H  | -3.64017 | -3.86011 | 1.58604  |
| H  | -0.68096 | -3.15565 | 5.51744  |
| H  | -1.99013 | -5.26745 | 5.27373  |
| C  | -0.66914 | -1.06998 | 3.69     |
| C  | 0.45279  | -0.7919  | 4.64261  |
| H  | 0.06476  | -0.66758 | 5.65996  |
| H  | 1.14559  | -1.63882 | 4.65717  |
| H  | 0.99003  | 0.10998  | 4.35487  |
| N  | -1.00134 | -0.27736 | 2.71394  |
| O  | -0.20721 | 0.85753  | 2.5028   |
| H  | 0.05503  | 0.72671  | 1.57025  |
| Ru | -2.40789 | -0.8178  | 1.32009  |
| Cl | -0.38264 | -1.51627 | 0.11748  |
| C  | -4.45704 | -1.29583 | 0.41193  |
| C  | -3.67753 | -0.7956  | -0.64485 |
| C  | -3.14941 | 0.54383  | -0.52673 |
| C  | -3.33436 | 1.2955   | 0.62867  |

|   |          |          |          |    |          |          |          |
|---|----------|----------|----------|----|----------|----------|----------|
| C | -4.0135  | 0.73615  | 1.7696   | O  | -1.34946 | -1.8642  | 0.30963  |
| C | -4.59737 | -0.55203 | 1.62554  | H  | -2.11268 | -2.43044 | 0.0989   |
| H | -4.88656 | -2.28838 | 0.33795  | Ru | -3.65298 | -0.54456 | 1.88128  |
| H | -2.54033 | 0.9358   | -1.33415 | C  | -4.36693 | 0.06069  | -0.23842 |
| H | -2.88677 | 2.2795   | 0.70168  | C  | -3.73913 | 1.25118  | 0.27579  |
| H | -5.14352 | -0.98653 | 2.45584  | C  | -4.23567 | 1.74601  | 1.49804  |
| C | -4.2499  | 1.5307   | 3.04727  | C  | -5.25768 | 1.0575   | 2.20729  |
| C | -5.66447 | 2.14785  | 3.02398  | C  | -5.92816 | -0.0724  | 1.66681  |
| C | -3.19314 | 2.61163  | 3.31891  | C  | -5.46553 | -0.54373 | 0.4058   |
| H | -5.76649 | 2.85599  | 2.19381  | H  | -4.01162 | -0.36732 | -1.16689 |
| H | -6.43793 | 1.38211  | 2.90914  | H  | -3.78978 | 2.61965  | 1.95609  |
| H | -5.85878 | 2.69154  | 3.95477  | H  | -5.55614 | 1.42684  | 3.18286  |
| H | -3.3359  | 3.02461  | 4.3224   | H  | -5.93143 | -1.41748 | -0.03748 |
| H | -2.17665 | 2.21744  | 3.24832  | C  | -7.07768 | -0.72741 | 2.38392  |
| H | -3.28484 | 3.44766  | 2.61539  | C  | -3.69489 | -2.51317 | 2.4944   |
| C | -3.4071  | -1.59694 | -1.88891 | C  | -3.78063 | -3.82124 | 1.90444  |
| H | -3.85242 | -1.10962 | -2.76442 | C  | -4.06041 | -4.00256 | 0.53196  |
| H | -2.32801 | -1.68233 | -2.0504  | C  | -3.55173 | -4.96827 | 2.70054  |
| H | -3.82085 | -2.6049  | -1.8087  | C  | -4.11688 | -5.27973 | -0.02266 |
| O | -3.56997 | -5.83841 | 3.26351  | H  | -4.26174 | -3.13367 | -0.08884 |
| C | -4.88027 | -5.85396 | 3.81796  | C  | -3.61194 | -6.23862 | 2.1402   |
| H | -5.29371 | -6.8462  | 3.62343  | H  | -3.32847 | -4.84278 | 3.75516  |
| H | -4.86176 | -5.67663 | 4.90218  | C  | -3.89251 | -6.40123 | 0.77849  |
| H | -5.52526 | -5.09673 | 3.35074  | H  | -4.33883 | -5.40097 | -1.07858 |
| H | -4.21363 | 0.80807  | 3.87295  | H  | -3.43603 | -7.10904 | 2.76494  |

### TS2-p

Sum of electronic and thermal Free Energies = -1652.458601

Sum of electronic and thermal Enthalpies = -1652.347320

Imaginary frequency= -329.0797

|   |          |          |         |   |          |          |          |
|---|----------|----------|---------|---|----------|----------|----------|
| C | -3.06065 | 0.43593  | 4.86511 | C | -5.3559  | -2.49399 | 7.28525  |
| C | -2.61708 | -0.34443 | 3.79015 | C | -5.09318 | -1.56351 | 8.31361  |
| C | -1.20298 | -0.49151 | 3.60981 | C | -6.2139  | -3.58335 | 7.54259  |
| C | -0.31595 | 0.07969  | 4.53161 | C | -5.68068 | -1.72328 | 9.56452  |
| C | -0.77603 | 0.83256  | 5.60566 | H | -4.43526 | -0.72332 | 8.11404  |
| C | -2.16149 | 1.02472  | 5.76309 | C | -6.78857 | -3.73682 | 8.80048  |
| H | -4.1182  | 0.54581  | 5.07552 | H | -6.41734 | -4.29853 | 6.75217  |
| H | 0.75438  | -0.03943 | 4.39377 | C | -6.52578 | -2.80895 | 9.81221  |
| H | -0.06774 | 1.26252  | 6.30224 | H | -5.47777 | -1.00249 | 10.3507  |
| C | -0.76002 | -1.15579 | 2.40189 | H | -7.44496 | -4.57983 | 8.99292  |
| C | 0.62905  | -1.67197 | 2.17708 | H | -6.9786  | -2.9315  | 10.79131 |
| H | 1.26951  | -0.88046 | 1.77053 | C | -2.65807 | 2.00628  | -0.51425 |
| H | 1.06737  | -2.01442 | 3.11622 | C | -2.01487 | 1.12534  | -1.60495 |
| H | 0.61843  | -2.48889 | 1.45566 | C | -3.36076 | 3.21089  | -1.19345 |
| N | -1.70613 | -1.25148 | 1.51067 | H | -1.58215 | 0.21061  | -1.18927 |

|   |          |          |          |
|---|----------|----------|----------|
| H | -2.72862 | 0.85306  | -2.38913 |
| H | -1.21237 | 1.68591  | -2.09244 |
| H | -3.79644 | 3.89256  | -0.45635 |
| H | -2.63526 | 3.77513  | -1.78764 |
| H | -4.15993 | 2.88058  | -1.86501 |
| H | -7.15907 | -1.78446 | 2.11958  |
| H | -6.96112 | -0.65442 | 3.46783  |
| H | -8.02063 | -0.23861 | 2.11231  |
| O | -2.72763 | 1.73815  | 6.76593  |
| C | -1.88101 | 2.38865  | 7.71428  |
| H | -1.22246 | 3.11635  | 7.22659  |
| H | -2.54979 | 2.90897  | 8.39972  |
| H | -1.27816 | 1.66453  | 8.27406  |
| H | -1.88503 | 2.36535  | 0.13257  |

**IM1-m**

Sum of electronic and thermal Free Energies = -1958.274259

Sum of electronic and thermal Enthalpies = -1958.186228

|    |          |          |          |
|----|----------|----------|----------|
| C  | -1.70137 | -2.08523 | -0.32064 |
| C  | -1.85213 | -1.50597 | 0.93983  |
| C  | -2.63071 | -0.35578 | 1.13229  |
| C  | -3.31888 | 0.17598  | 0.02548  |
| C  | -3.17799 | -0.39578 | -1.23363 |
| C  | -2.35317 | -1.51745 | -1.42271 |
| H  | -1.08067 | -2.96598 | -0.42995 |
| H  | -1.33756 | -1.95555 | 1.78462  |
| H  | -3.95816 | 1.04277  | 0.16603  |
| H  | -3.7108  | 0.00328  | -2.09094 |
| C  | -2.74563 | 0.21379  | 2.49517  |
| C  | -3.11603 | -0.70292 | 3.63643  |
| H  | -3.26644 | -1.72386 | 3.28406  |
| H  | -2.35065 | -0.68507 | 4.4198   |
| H  | -4.03836 | -0.34198 | 4.10336  |
| N  | -2.54453 | 1.47286  | 2.73677  |
| O  | -2.73424 | 1.76108  | 4.07055  |
| H  | -2.65283 | 2.74903  | 4.11911  |
| Cl | -2.24126 | 4.58561  | 3.55343  |
| C  | -1.61183 | 3.13508  | -0.69874 |
| C  | -0.77422 | 2.16573  | -0.11273 |
| C  | 0.14059  | 2.51103  | 0.94212  |
| C  | 0.17567  | 3.8566   | 1.35982  |
| C  | -0.66277 | 4.84514  | 0.74149  |
| C  | -1.56004 | 4.52035  | -0.29743 |
| H  | -2.35317 | 2.82144  | -1.42541 |
| H  | -0.86603 | 1.13173  | -0.42007 |

|    |          |          |          |
|----|----------|----------|----------|
| H  | 0.78308  | 4.14227  | 2.21132  |
| H  | -0.66897 | 5.84211  | 1.16212  |
| C  | 1.00702  | 1.45604  | 1.57513  |
| Ru | -1.97818 | 3.20802  | 1.50589  |
| C  | -2.50557 | 5.52262  | -0.93933 |
| C  | -2.65026 | 6.83237  | -0.15402 |
| C  | -2.08187 | 5.78842  | -2.39828 |
| H  | -2.9618  | 6.64774  | 0.87731  |
| H  | -1.7174  | 7.4089   | -0.14379 |
| H  | -3.41209 | 7.45862  | -0.62838 |
| H  | -2.01483 | 4.86338  | -2.981   |
| H  | -2.81409 | 6.43821  | -2.88837 |
| H  | -1.10741 | 6.28656  | -2.44339 |
| H  | 1.31572  | 1.74732  | 2.58207  |
| H  | 0.48074  | 0.49971  | 1.63296  |
| H  | 1.91041  | 1.30298  | 0.97198  |
| Cl | -4.38543 | 3.39788  | 1.16121  |
| O  | -2.24473 | -1.97648 | -2.70094 |
| C  | -1.66304 | -3.25725 | -2.9085  |
| H  | -2.22841 | -4.0348  | -2.3768  |
| H  | -1.71189 | -3.4398  | -3.98283 |
| H  | -0.61298 | -3.2945  | -2.58895 |
| H  | -3.48836 | 5.03558  | -0.94648 |

**IM1a-m**

Sum of electronic and thermal Free Energies = -1497.828497

Sum of electronic and thermal Enthalpies = -1497.744097

|   |          |          |         |
|---|----------|----------|---------|
| C | -3.17235 | -2.32675 | 2.37148 |
| C | -2.00607 | -1.62523 | 2.6932  |
| C | -1.61811 | -0.5042  | 1.93021 |
| C | -2.43104 | -0.08036 | 0.86827 |
| C | -3.58275 | -0.79262 | 0.54734 |
| C | -3.95308 | -1.91897 | 1.29244 |
| H | -3.48221 | -3.17113 | 2.97931 |
| H | -1.46252 | -1.86656 | 3.60255 |
| H | -2.14016 | 0.77216  | 0.26312 |
| H | -4.85877 | -2.46089 | 1.03983 |
| C | -0.34497 | 0.17308  | 2.22548 |
| C | -0.28365 | 1.41539  | 3.07476 |
| H | -1.28633 | 1.7425   | 3.3468  |
| H | 0.25408  | 1.22174  | 4.01228 |
| H | 0.21321  | 2.24134  | 2.55028 |
| N | 0.71877  | -0.37272 | 1.72071 |
| O | 1.96564  | 0.14118  | 2.03293 |
| H | 1.85048  | 0.93045  | 2.5904  |

|                                               |              |          |          |                                               |              |          |          |
|-----------------------------------------------|--------------|----------|----------|-----------------------------------------------|--------------|----------|----------|
| Ru                                            | 0.78618      | -1.97376 | 0.32467  | C                                             | -2.07686     | 0.40572  | 9.13444  |
| Cl                                            | -0.40055     | -0.57843 | -1.16614 | H                                             | -2.94155     | 0.7902   | 8.59696  |
| C                                             | 0.90764      | -4.06016 | -0.50074 | H                                             | -2.37035     | -0.47247 | 9.7166   |
| C                                             | 1.22978      | -4.1529  | 0.89885  | H                                             | -1.7447      | 1.17017  | 9.84403  |
| C                                             | 2.27683      | -3.34091 | 1.3909   | N                                             | 0.13741      | -0.49652 | 8.61405  |
| C                                             | 2.93211      | -2.41571 | 0.53345  | O                                             | 0.17643      | -0.72339 | 9.98704  |
| C                                             | 2.63673      | -2.32371 | -0.86727 | H                                             | 0.85675      | -1.40766 | 10.0715  |
| C                                             | 1.61026      | -3.20021 | -1.36157 | Cl                                            | 1.62997      | 2.73151  | 6.81744  |
| H                                             | 0.0657       | -4.62467 | -0.88737 | C                                             | 3.25808      | -2.65367 | 7.9117   |
| H                                             | 2.5141       | -3.34862 | 2.44909  | C                                             | 3.33202      | -2.46243 | 6.48739  |
| H                                             | 3.6408       | -1.72428 | 0.97091  | C                                             | 3.49271      | -1.15003 | 6.00911  |
| H                                             | 1.27878      | -3.10936 | -2.38694 | C                                             | 3.55603      | -0.04095 | 6.90948  |
| C                                             | 3.44552      | -1.39797 | -1.78382 | C                                             | 3.53705      | -0.22386 | 8.31572  |
| C                                             | 4.83677      | -2.0695  | -1.94292 | C                                             | 3.37662      | -1.56694 | 8.79472  |
| C                                             | 3.61517      | 0.00658  | -1.16537 | H                                             | 3.07185      | -3.64868 | 8.29959  |
| H                                             | 5.36347      | -2.15113 | -0.9867  | H                                             | 3.50595      | -0.97034 | 4.93983  |
| H                                             | 4.75412      | -3.07178 | -2.3756  | H                                             | 3.57789      | 0.97074  | 6.51769  |
| H                                             | 5.45375      | -1.46501 | -2.61436 | H                                             | 3.31795      | -1.74984 | 9.86254  |
| H                                             | 4.22572      | 0.61814  | -1.83564 | C                                             | 3.73279      | 0.97948  | 9.22619  |
| H                                             | 2.64692      | 0.49758  | -1.0398  | Ru                                            | 1.61862      | -1.12902 | 7.32909  |
| H                                             | 4.12254      | -0.01272 | -0.19664 | C                                             | 3.21285      | -3.63934 | 5.56145  |
| C                                             | 0.47337      | -5.09573 | 1.79151  | H                                             | 3.12526      | 1.78359  | 8.79386  |
| H                                             | 0.90541      | -6.10008 | 1.70389  | H                                             | 1.01728      | 1.15532  | 6.5033   |
| H                                             | 0.53369      | -4.79898 | 2.84111  | Cl                                            | 0.03951      | -2.91946 | 6.77367  |
| H                                             | -0.57769     | -5.16695 | 1.5004   | H                                             | -0.76633     | 0.38022  | 2.87555  |
| O                                             | -4.38816     | -0.37253 | -0.55708 | O                                             | -3.23543     | 0.7294   | 3.9891   |
| C                                             | -5.50873     | -1.25061 | -0.69195 | C                                             | -3.25999     | 0.78046  | 2.56636  |
| H                                             | -6.24951     | -0.79082 | -1.31223 | H                                             | -2.92339     | -0.16514 | 2.12634  |
| H                                             | -5.19017     | -2.16944 | -1.13822 | H                                             | -4.301       | 0.95555  | 2.2937   |
| H                                             | -5.92498     | -1.44858 | 0.27368  | H                                             | -2.64202     | 1.60162  | 2.18532  |
| H                                             | 2.9936       | -1.29404 | -2.74812 | C                                             | 3.28592      | 0.75993  | 10.67763 |
| <b>TS1-m</b>                                  |              |          |          | H                                             | 3.90511      | 0.01393  | 11.19218 |
| Sum of electronic and thermal Free Energies = | -1958.227339 |          |          | H                                             | 3.38784      | 1.69575  | 11.23514 |
| Sum of electronic and thermal Enthalpies =    | -1958.140183 |          |          | H                                             | 2.23765      | 0.45361  | 10.73869 |
| Imaginary frequency=                          | -350.2650    |          |          | C                                             | 5.2109       | 1.42365  | 9.17459  |
| C                                             | -2.05629     | 0.51649  | 4.61678  | H                                             | 5.52735      | 1.65059  | 8.15226  |
| C                                             | -2.12329     | 0.46712  | 6.01854  | H                                             | 5.35004      | 2.32753  | 9.7757   |
| C                                             | -0.96505     | 0.25304  | 6.75131  | H                                             | 5.87547      | 0.64751  | 9.57261  |
| C                                             | 0.32306      | 0.13755  | 6.12086  | H                                             | 2.39634      | -4.29269 | 5.87737  |
| C                                             | 0.32544      | 0.14879  | 4.70492  | H                                             | 3.01281      | -3.31747 | 4.53653  |
| C                                             | -0.82491     | 0.34389  | 3.95651  | H                                             | 4.14892      | -4.2138  | 5.56676  |
| H                                             | -3.09963     | 0.55975  | 6.48063  | <b>IM2-m</b>                                  |              |          |          |
| H                                             | 1.27338      | 0.06612  | 4.18115  | Sum of electronic and thermal Free Energies = | -1497.364870 |          |          |
| C                                             | -0.96116     | 0.06097  | 8.1967   | Sum of electronic and thermal Enthalpies =    | -1497.447478 |          |          |



|    |          |          |          |                                               |              |          |          |
|----|----------|----------|----------|-----------------------------------------------|--------------|----------|----------|
| C  | -3.18063 | -3.46524 | 2.87608  | H                                             | -2.7498      | -6.74677 | 5.36666  |
| C  | -2.39738 | -2.31084 | 2.77874  | H                                             | -2.43882     | -6.56573 | 7.11277  |
| C  | -1.45394 | -2.09929 | 3.82113  | H                                             | -3.82046     | -5.71767 | 6.36262  |
| C  | -1.31487 | -2.98407 | 4.89731  | H                                             | -4.64162     | 0.75809  | 3.78836  |
| C  | -2.12032 | -4.12253 | 4.96267  |                                               |              |          |          |
| C  | -3.05872 | -4.35805 | 3.94886  | <b>TS2-m</b>                                  |              |          |          |
| H  | -3.90453 | -3.70197 | 2.10069  | Sum of electronic and thermal Free Energies = | -1652.457333 |          |          |
| H  | -0.58494 | -2.82009 | 5.68395  | Sum of electronic and thermal Enthalpies =    | -1652.345349 |          |          |
| C  | -0.59329 | -0.93861 | 3.63034  | Imaginary frequency=                          | -317.5694    |          |          |
| C  | 0.60373  | -0.62669 | 4.47403  | C                                             | -3.08786     | 0.4899   | 4.82129  |
| H  | 0.29797  | -0.43605 | 5.50879  | C                                             | -2.65082     | -0.31058 | 3.75098  |
| H  | 1.28012  | -1.48706 | 4.48683  | C                                             | -1.24046     | -0.48893 | 3.614    |
| H  | 1.13369  | 0.24313  | 4.08996  | C                                             | -0.34435     | 0.069    | 4.52579  |
| N  | -0.94971 | -0.23971 | 2.59377  | C                                             | -0.81447     | 0.86184  | 5.58103  |
| O  | -0.11329 | 0.8127   | 2.20176  | C                                             | -2.19833     | 1.08233  | 5.71227  |
| H  | 0.11068  | 0.53678  | 1.29056  | H                                             | -4.1516      | 0.6229   | 4.99003  |
| Ru | -2.45493 | -0.85131 | 1.33937  | H                                             | 0.72715      | -0.06312 | 4.42168  |
| Cl | -0.51647 | -1.81713 | 0.16872  | C                                             | -0.79072     | -1.20256 | 2.42535  |
| C  | -4.48099 | -1.33703 | 0.36213  | C                                             | 0.59071      | -1.75088 | 2.24502  |
| C  | -3.67981 | -0.81448 | -0.66954 | H                                             | 1.2742       | -0.95619 | 1.92561  |
| C  | -3.14854 | 0.517    | -0.52448 | H                                             | 0.96485      | -2.15304 | 3.18846  |
| C  | -3.35089 | 1.2438   | 0.64899  | H                                             | 0.60032      | -2.52727 | 1.48166  |
| C  | -4.09001 | 0.69013  | 1.75159  | N                                             | -1.7272      | -1.30113 | 1.52887  |
| C  | -4.65012 | -0.60404 | 1.57799  | O                                             | -1.36844     | -1.94295 | 0.34695  |
| H  | -4.90809 | -2.32821 | 0.26284  | H                                             | -2.15537     | -2.46818 | 0.11781  |
| H  | -2.52423 | 0.92236  | -1.31298 | Ru                                            | -3.65731     | -0.543   | 1.8535   |
| H  | -2.89133 | 2.22058  | 0.75298  | C                                             | -4.28853     | 0.08827  | -0.29153 |
| H  | -5.21522 | -1.04903 | 2.39013  | C                                             | -3.66881     | 1.26751  | 0.25863  |
| C  | -4.40279 | 1.48998  | 3.00691  | C                                             | -4.20714     | 1.75311  | 1.46608  |
| C  | -5.65803 | 2.35598  | 2.7704   | C                                             | -5.26731     | 1.07142  | 2.12777  |
| C  | -3.23612 | 2.3495   | 3.51518  | C                                             | -5.92121     | -0.04782 | 1.55324  |
| H  | -5.47033 | 3.11152  | 1.99986  | C                                             | -5.41186     | -0.51464 | 0.30595  |
| H  | -6.51    | 1.75116  | 2.44656  | H                                             | -3.90264     | -0.33481 | -1.21028 |
| H  | -5.94163 | 2.87994  | 3.68911  | H                                             | -3.77016     | 2.61699  | 1.95089  |
| H  | -3.50368 | 2.8076   | 4.47288  | H                                             | -5.60627     | 1.43962  | 3.09038  |
| H  | -2.33223 | 1.75304  | 3.65588  | H                                             | -5.86928     | -1.37909 | -0.1635  |
| H  | -2.99935 | 3.16535  | 2.82311  | C                                             | -7.10739     | -0.70172 | 2.20884  |
| C  | -3.37976 | -1.60277 | -1.91501 | C                                             | -3.79455     | -2.50764 | 2.48976  |
| H  | -3.72169 | -1.0587  | -2.80252 | C                                             | -3.91772     | -3.81071 | 1.88616  |
| H  | -2.30049 | -1.76443 | -1.99926 | C                                             | -4.14402     | -3.97495 | 0.50266  |
| H  | -3.87074 | -2.57823 | -1.89597 | C                                             | -3.7789      | -4.96965 | 2.68439  |
| H  | -3.69153 | -5.2386  | 3.97639  | C                                             | -4.23252     | -5.24618 | -0.06236 |
| O  | -1.90705 | -4.94866 | 6.03695  | H                                             | -4.27772     | -3.09649 | -0.12273 |
| C  | -2.78233 | -6.04848 | 6.21466  | C                                             | -3.87102     | -6.23405 | 2.11442  |
|    |          |          |          | H                                             | -3.59902     | -4.85928 | 3.74897  |

|                                                            |          |          |          |    |          |          |          |
|------------------------------------------------------------|----------|----------|----------|----|----------|----------|----------|
| C                                                          | -4.09618 | -6.37962 | 0.7407   | C  | -0.23031 | 0.0028   | 4.51601  |
| H                                                          | -4.41111 | -5.35237 | -1.12815 | C  | -0.66899 | 0.74226  | 5.60492  |
| H                                                          | -3.76387 | -7.1134  | 2.74204  | C  | -2.04684 | 0.93254  | 5.7519   |
| H                                                          | -4.16404 | -7.36972 | 0.30148  | H  | -4.03004 | 0.53351  | 5.10485  |
| C                                                          | -3.71296 | -1.94988 | 3.67504  | H  | 0.83438  | -0.13772 | 4.3612   |
| C                                                          | -4.21632 | -2.16231 | 4.9492   | H  | 0.01518  | 1.17239  | 6.32465  |
| C                                                          | -4.64709 | -2.3549  | 6.07608  | C  | -0.72571 | -1.18661 | 2.36997  |
| C                                                          | -5.12535 | -2.5807  | 7.39549  | C  | 0.65359  | -1.71502 | 2.12255  |
| C                                                          | -4.50388 | -1.94409 | 8.49109  | H  | 1.30768  | -0.91502 | 1.75597  |
| C                                                          | -6.21883 | -3.44089 | 7.6283   | H  | 1.08469  | -2.10654 | 3.04613  |
| C                                                          | -4.97004 | -2.1627  | 9.78327  | H  | 0.63238  | -2.49849 | 1.36551  |
| H                                                          | -3.65883 | -1.28752 | 8.31092  | N  | -1.69047 | -1.26399 | 1.49893  |
| C                                                          | -6.67345 | -3.65624 | 8.92554  | O  | -1.3592  | -1.85808 | 0.28808  |
| H                                                          | -6.69734 | -3.93192 | 6.78704  | H  | -2.15861 | -2.35529 | 0.04106  |
| C                                                          | -6.05309 | -3.01853 | 10.00381 | Ru | -3.62942 | -0.55586 | 1.91559  |
| H                                                          | -4.48681 | -1.67032 | 10.62174 | C  | -4.4134  | 0.06255  | -0.18894 |
| H                                                          | -7.51349 | -4.32191 | 9.09803  | C  | -3.77421 | 1.24984  | 0.31762  |
| H                                                          | -6.41182 | -3.18926 | 11.01414 | C  | -4.23804 | 1.73264  | 1.55813  |
| C                                                          | -2.55279 | 2.0203   | -0.48367 | C  | -5.2392  | 1.03707  | 2.28869  |
| C                                                          | -1.86214 | 1.13607  | -1.54267 | C  | -5.9182  | -0.09281 | 1.75764  |
| C                                                          | -3.22232 | 3.22407  | -1.19682 | C  | -5.49107 | -0.55085 | 0.47987  |
| H                                                          | -1.45897 | 0.21624  | -1.10874 | H  | -4.08585 | -0.35273 | -1.1334  |
| H                                                          | -2.53675 | 0.87086  | -2.36339 | H  | -3.78503 | 2.60686  | 2.00812  |
| H                                                          | -1.03096 | 1.69114  | -1.98694 | H  | -5.51858 | 1.4015   | 3.27193  |
| H                                                          | -3.69062 | 3.90722  | -0.48137 | H  | -5.96746 | -1.42168 | 0.04187  |
| H                                                          | -2.47029 | 3.78704  | -1.75853 | C  | -7.04533 | -0.75564 | 2.5022   |
| H                                                          | -3.99081 | 2.89328  | -1.90338 | C  | -3.64884 | -2.54291 | 2.50597  |
| H                                                          | -7.08983 | -1.78547 | 2.06868  | C  | -3.71018 | -3.84188 | 1.89975  |
| H                                                          | -7.13396 | -0.49402 | 3.28071  | C  | -4.02324 | -4.0136  | 0.53281  |
| H                                                          | -8.03734 | -0.32191 | 1.76998  | C  | -3.42868 | -4.9912  | 2.67595  |
| H                                                          | -2.58606 | 1.69918  | 6.51437  | C  | -4.06058 | -5.28483 | -0.0356  |
| O                                                          | 0.13183  | 1.37113  | 6.40108  | H  | -4.27009 | -3.14392 | -0.0706  |
| C                                                          | -0.27104 | 2.19675  | 7.49197  | C  | -3.47047 | -6.25579 | 2.10134  |
| H                                                          | 0.65131  | 2.49226  | 7.99566  | H  | -3.18011 | -4.8721  | 3.72563  |
| H                                                          | -0.79732 | 3.09315  | 7.14154  | C  | -3.78358 | -6.40903 | 0.74566  |
| H                                                          | -0.90939 | 1.64902  | 8.1925   | H  | -4.30952 | -5.40034 | -1.08602 |
| H                                                          | -1.80834 | 2.38023  | 0.19541  | H  | -3.25479 | -7.12859 | 2.70988  |
| <b>TS2-p-NO<sub>2</sub></b>                                |          |          |          | H  | -3.81101 | -7.39935 | 0.30247  |
| Sum of electronic and thermal Free Energies = -1742.450792 |          |          |          | C  | -3.60586 | -1.95171 | 3.68461  |
| Sum of electronic and thermal Enthalpies = -1742.340305    |          |          |          | C  | -4.23995 | -2.13475 | 4.90825  |
| Imaginary frequency= -338.5300                             |          |          |          | C  | -4.79429 | -2.2659  | 5.98898  |
| C                                                          | -2.98079 | 0.39328  | 4.88392  | C  | -5.4452  | -2.41505 | 7.24345  |
| C                                                          | -2.55993 | -0.37592 | 3.77907  | C  | -5.3467  | -1.39784 | 8.21729  |
| C                                                          | -1.14868 | -0.52628 | 3.59368  | C  | -6.19719 | -3.57532 | 7.52464  |

|                                                            |          |          |          |    |          |          |          |
|------------------------------------------------------------|----------|----------|----------|----|----------|----------|----------|
| C                                                          | -5.99127 | -1.54533 | 9.44141  | Ru | -3.64717 | -0.56024 | 1.96075  |
| H                                                          | -4.77774 | -0.49943 | 7.99984  | C  | -4.32078 | 0.12178  | -0.15908 |
| C                                                          | -6.82805 | -3.71375 | 8.75659  | C  | -3.68633 | 1.28524  | 0.40592  |
| H                                                          | -6.2735  | -4.35586 | 6.77457  | C  | -4.20246 | 1.74629  | 1.63371  |
| C                                                          | -6.72822 | -2.70111 | 9.71528  | C  | -5.2492  | 1.05187  | 2.29905  |
| H                                                          | -5.91665 | -0.75806 | 10.185   | C  | -5.91947 | -0.05302 | 1.7096   |
| H                                                          | -7.40127 | -4.61057 | 8.97005  | C  | -5.43925 | -0.48772 | 0.44204  |
| H                                                          | -7.22509 | -2.81236 | 10.67416 | H  | -3.95314 | -0.28007 | -1.09457 |
| C                                                          | -2.72337 | 2.01795  | -0.49991 | H  | -3.75702 | 2.60151  | 2.1262   |
| C                                                          | -2.0877  | 1.14058  | -1.598   | H  | -5.56975 | 1.39882  | 3.27576  |
| C                                                          | -3.46486 | 3.20391  | -1.17154 | H  | -5.90957 | -1.33787 | -0.04066 |
| H                                                          | -1.62691 | 0.23824  | -1.18503 | C  | -7.09584 | -0.7123  | 2.37716  |
| H                                                          | -2.81202 | 0.84752  | -2.36468 | C  | -3.72503 | -2.54367 | 2.52932  |
| H                                                          | -1.30738 | 1.71243  | -2.10755 | C  | -3.81871 | -3.8364  | 1.90911  |
| H                                                          | -3.89785 | 3.88186  | -0.42954 | C  | -4.09176 | -3.98403 | 0.53106  |
| H                                                          | -2.76279 | 3.778    | -1.78398 | C  | -3.60675 | -5.00145 | 2.68336  |
| H                                                          | -4.27109 | 2.85367  | -1.8242  | C  | -4.15622 | -5.24788 | -0.05129 |
| H                                                          | -7.1504  | -1.80383 | 2.2129   | H  | -4.28169 | -3.10026 | -0.07229 |
| H                                                          | -6.88571 | -0.71257 | 3.5821   | C  | -3.67644 | -6.25866 | 2.09547  |
| H                                                          | -7.99139 | -0.24809 | 2.28065  | H  | -3.3905  | -4.90063 | 3.74206  |
| N                                                          | -2.5347  | 1.71974  | 6.90422  | C  | -3.94861 | -6.38802 | 0.72845  |
| O                                                          | -1.69408 | 2.23681  | 7.63115  | H  | -4.3715  | -5.34517 | -1.11098 |
| O                                                          | -3.75447 | 1.80243  | 7.06043  | H  | -3.51479 | -7.14419 | 2.70221  |
| H                                                          | -1.94349 | 2.39698  | 0.12701  | H  | -3.99756 | -7.37275 | 0.27479  |
| <b>TS2-m-NO<sub>2</sub></b>                                |          |          |          | C  | -3.65944 | -1.99131 | 3.72619  |
| Sum of electronic and thermal Free Energies = -1742.450936 |          |          |          | C  | -4.25134 | -2.22245 | 4.96108  |
| Sum of electronic and thermal Enthalpies = -1742.339432    |          |          |          | C  | -4.75266 | -2.42358 | 6.0572   |
| Imaginary frequency= -342.5097                             |          |          |          | C  | -5.32171 | -2.65912 | 7.33814  |
| C                                                          | -3.0486  | 0.37512  | 4.94561  | C  | -4.74225 | -2.07738 | 8.4863   |
| C                                                          | -2.61457 | -0.40557 | 3.84721  | C  | -6.46706 | -3.47178 | 7.47765  |
| C                                                          | -1.20159 | -0.57598 | 3.68235  | C  | -5.30168 | -2.30231 | 9.7401   |
| C                                                          | -0.29463 | -0.04708 | 4.60594  | H  | -3.85698 | -1.45852 | 8.37948  |
| C                                                          | -0.77981 | 0.70379  | 5.66705  | C  | -7.0154  | -3.69277 | 8.73716  |
| C                                                          | -2.14955 | 0.93901  | 5.83597  | H  | -6.91158 | -3.92122 | 6.59542  |
| H                                                          | -4.11072 | 0.50356  | 5.12193  | C  | -6.43663 | -3.1089  | 9.86819  |
| H                                                          | 0.77584  | -0.17369 | 4.49803  | H  | -4.8514  | -1.8524  | 10.6195  |
| C                                                          | -0.76511 | -1.23977 | 2.46469  | H  | -7.8956  | -4.32009 | 8.83942  |
| C                                                          | 0.61081  | -1.78652 | 2.24008  | H  | -6.86867 | -3.28383 | 10.84894 |
| H                                                          | 1.26881  | -1.01025 | 1.83071  | C  | -2.57936 | 2.05304  | -0.3341  |
| H                                                          | 1.04325  | -2.13747 | 3.18032  | C  | -1.94867 | 1.21456  | -1.46492 |
| H                                                          | 0.57907  | -2.6045  | 1.52143  | C  | -3.24669 | 3.31016  | -0.95293 |
| N                                                          | -1.7136  | -1.29836 | 1.57549  | H  | -1.54045 | 0.26884  | -1.09536 |
| O                                                          | -1.36798 | -1.88912 | 0.36482  | H  | -2.66208 | 1.00202  | -2.26822 |
| H                                                          | -2.15227 | -2.41241 | 0.12201  | H  | -1.12776 | 1.77929  | -1.91517 |

|   |          |          |          |   |          |          |          |
|---|----------|----------|----------|---|----------|----------|----------|
| H | -3.67269 | 3.96211  | -0.18373 | C | -3.66792 | -2.51566 | 2.51493  |
| H | -2.50077 | 3.88725  | -1.50759 | C | -3.74092 | -3.82401 | 1.92662  |
| H | -4.04644 | 3.03744  | -1.64965 | C | -4.03757 | -4.01067 | 0.55838  |
| H | -7.17666 | -1.76345 | 2.09097  | C | -3.48606 | -4.96598 | 2.72227  |
| H | -7.01764 | -0.658   | 3.46557  | C | -4.08545 | -5.28903 | 0.00688  |
| H | -8.02456 | -0.21086 | 2.08114  | H | -4.2606  | -3.14581 | -0.06084 |
| H | -2.48049 | 1.54659  | 6.66982  | C | -3.53795 | -6.23794 | 2.16484  |
| N | 0.1713   | 1.27944  | 6.62695  | H | -3.25024 | -4.8358  | 3.77357  |
| O | -0.29451 | 1.9485   | 7.54834  | C | -3.83531 | -6.40589 | 0.80739  |
| O | 1.36706  | 1.05365  | 6.44408  | H | -4.32099 | -5.41566 | -1.04536 |
| H | -1.80383 | 2.35831  | 0.33691  | H | -3.34263 | -7.105   | 2.7883   |

### TS2-p-CN

Sum of electronic and thermal Free Energies = -1630.196855

Sum of electronic and thermal Enthalpies = -1630.087389

Imaginary frequency= -335.9804

|    |          |          |          |   |          |          |          |
|----|----------|----------|----------|---|----------|----------|----------|
| C  | -3.03506 | 0.44736  | 4.86688  | C | -5.39465 | -2.46758 | 7.27502  |
| C  | -2.59467 | -0.3363  | 3.78228  | C | -5.08782 | -1.61253 | 8.35539  |
| C  | -1.18171 | -0.47293 | 3.60857  | C | -6.33452 | -3.5043  | 7.4581   |
| C  | -0.28044 | 0.08771  | 4.52778  | C | -5.71286 | -1.79313 | 9.585    |
| C  | -0.73989 | 0.84084  | 5.59747  | H | -4.36772 | -0.81214 | 8.21909  |
| C  | -2.1282  | 1.03449  | 5.75341  | C | -6.94596 | -3.67982 | 8.695    |
| H  | -4.09557 | 0.55833  | 5.05897  | H | -6.5707  | -4.16136 | 6.62732  |
| H  | 0.7876   | -0.04022 | 4.38446  | C | -6.63887 | -2.82581 | 9.7585   |
| H  | -0.04855 | 1.28383  | 6.30499  | H | -5.47579 | -1.1292  | 10.41032 |
| C  | -0.74045 | -1.14947 | 2.40066  | H | -7.66511 | -4.48149 | 8.83125  |
| C  | 0.64509  | -1.67285 | 2.1775   | H | -7.12094 | -2.96485 | 10.72128 |
| H  | 1.29526  | -0.87853 | 1.79207  | C | -2.69656 | 2.00811  | -0.52772 |
| H  | 1.07316  | -2.03528 | 3.11417  | C | -2.04692 | 1.12365  | -1.61178 |
| H  | 0.63485  | -2.47728 | 1.44236  | C | -3.42629 | 3.19128  | -1.21687 |
| N  | -1.69331 | -1.24699 | 1.51873  | H | -1.59181 | 0.22381  | -1.18728 |
| O  | -1.34279 | -1.86036 | 0.32212  | H | -2.76133 | 0.82607  | -2.386   |
| H  | -2.13889 | -2.36014 | 0.07054  | H | -1.25971 | 1.69206  | -2.11455 |
| Ru | -3.64193 | -0.5422  | 1.89711  | H | -3.86858 | 3.87454  | -0.48529 |
| C  | -4.38647 | 0.05088  | -0.22352 | H | -2.71464 | 3.76045  | -1.82279 |
| C  | -3.75992 | 1.24654  | 0.27965  | H | -4.2239  | 2.83855  | -1.87873 |
| C  | -4.24613 | 1.74199  | 1.50632  | H | -7.15461 | -1.79766 | 2.15771  |
| C  | -5.25825 | 1.05161  | 2.22711  | H | -6.93069 | -0.67858 | 3.51161  |
| C  | -5.92566 | -0.08577 | 1.69813  | H | -8.00964 | -0.2483  | 2.17656  |
| C  | -5.47414 | -0.55809 | 0.43372  | C | -2.63189 | 1.80596  | 6.85339  |
| H  | -4.0407  | -0.37541 | -1.15654 | N | -3.06056 | 2.4149   | 7.74679  |
| H  | -3.80298 | 2.62208  | 1.95472  | H | -1.92491 | 2.38937  | 0.10796  |
| H  | -5.55512 | 1.42682  | 3.20105  |   |          |          |          |
| H  | -5.94058 | -1.43514 | -0.00237 |   |          |          |          |
| C  | -7.06473 | -0.74326 | 2.42925  |   |          |          |          |

### TS2-m-CN

Sum of electronic and thermal Free Energies = -1630.196560

Sum of electronic and thermal Enthalpies = -1630.086944

Imaginary frequency= -338.8103

|    |          |          |          |
|----|----------|----------|----------|
| C  | -3.05281 | 0.3849   | 4.96013  |
| C  | -2.61638 | -0.39313 | 3.86292  |
| C  | -1.20445 | -0.56111 | 3.70453  |
| C  | -0.30227 | -0.03284 | 4.63318  |
| C  | -0.76962 | 0.727    | 5.71094  |
| C  | -2.15698 | 0.94777  | 5.85313  |
| H  | -4.11551 | 0.51283  | 5.13397  |
| H  | 0.76543  | -0.1751  | 4.50616  |
| C  | -0.76311 | -1.22688 | 2.48908  |
| C  | 0.6138   | -1.77315 | 2.26948  |
| H  | 1.27588  | -0.99145 | 1.87861  |
| H  | 1.03693  | -2.13795 | 3.20734  |
| H  | 0.59007  | -2.58036 | 1.53738  |
| N  | -1.70772 | -1.28757 | 1.59613  |
| O  | -1.35745 | -1.88274 | 0.38917  |
| H  | -2.14596 | -2.39599 | 0.13936  |
| Ru | -3.64213 | -0.5481  | 1.97047  |
| C  | -4.32304 | 0.12262  | -0.1506  |
| C  | -3.68377 | 1.28886  | 0.40323  |
| C  | -4.19147 | 1.75875  | 1.63113  |
| C  | -5.23635 | 1.07055  | 2.30615  |
| C  | -5.91268 | -0.03631 | 1.72753  |
| C  | -5.43919 | -0.48111 | 0.46091  |
| H  | -3.96175 | -0.28545 | -1.08589 |
| H  | -3.74123 | 2.61568  | 2.11606  |
| H  | -5.55065 | 1.42412  | 3.28252  |
| H  | -5.91316 | -1.3342  | -0.01303 |
| C  | -7.08729 | -0.68848 | 2.40536  |
| C  | -3.7253  | -2.53229 | 2.53908  |
| C  | -3.81931 | -3.82419 | 1.91598  |
| C  | -4.09556 | -3.96969 | 0.53851  |
| C  | -3.60345 | -4.99074 | 2.68698  |
| C  | -4.16031 | -5.23269 | -0.04612 |
| H  | -4.2879  | -3.08509 | -0.06281 |
| C  | -3.67234 | -6.24699 | 2.0967   |
| H  | -3.3842  | -4.89192 | 3.74526  |
| C  | -3.94842 | -6.37426 | 0.7303   |
| H  | -4.37897 | -5.32787 | -1.10532 |
| H  | -3.5068  | -7.13344 | 2.70127  |
| H  | -3.99716 | -7.35818 | 0.2748   |
| C  | -3.66203 | -1.98271 | 3.73638  |
| C  | -4.25274 | -2.21698 | 4.9711   |
| C  | -4.75673 | -2.42467 | 6.0645   |

|   |          |          |          |
|---|----------|----------|----------|
| C | -5.33252 | -2.67141 | 7.34017  |
| C | -4.7662  | -2.09298 | 8.49624  |
| C | -6.47226 | -3.4936  | 7.46618  |
| C | -5.33293 | -2.3302  | 9.74431  |
| H | -3.88476 | -1.46738 | 8.39982  |
| C | -7.02785 | -3.72718 | 8.72004  |
| H | -6.90656 | -3.94075 | 6.57785  |
| C | -6.46219 | -3.14628 | 9.85898  |
| H | -4.89261 | -1.88289 | 10.62995 |
| H | -7.9035  | -4.36217 | 8.81163  |
| H | -6.8998  | -3.33105 | 10.83531 |
| C | -2.58275 | 2.05     | -0.35219 |
| C | -1.93532 | 1.18939  | -1.45643 |
| C | -3.26365 | 3.27956  | -1.0095  |
| H | -1.52044 | 0.25796  | -1.0598  |
| H | -2.63995 | 0.94833  | -2.25875 |
| H | -1.11776 | 1.75142  | -1.91591 |
| H | -3.70042 | 3.94777  | -0.26081 |
| H | -2.52361 | 3.84968  | -1.57955 |
| H | -4.05745 | 2.97601  | -1.69975 |
| H | -7.16271 | -1.74563 | 2.13906  |
| H | -7.01101 | -0.6129  | 3.49263  |
| H | -8.01824 | -0.19719 | 2.0986   |
| H | -2.51647 | 1.55199  | 6.67965  |
| C | 0.15129  | 1.28504  | 6.6536   |
| N | 0.8981   | 1.73922  | 7.42105  |
| H | -1.8147  | 2.38451  | 0.31347  |

**TS2-p-COOH**

Sum of electronic and thermal Free Energies = -1726.521412

Sum of electronic and thermal Enthalpies = -1726.410494

Imaginary frequency= -335.1721

|   |          |          |         |
|---|----------|----------|---------|
| C | -2.98079 | 0.39328  | 4.88392 |
| C | -2.55993 | -0.37592 | 3.77907 |
| C | -1.14868 | -0.52628 | 3.59368 |
| C | -0.23031 | 0.0028   | 4.51601 |
| C | -0.66899 | 0.74226  | 5.60492 |
| C | -2.04684 | 0.93254  | 5.7519  |
| H | -4.03004 | 0.53351  | 5.10485 |
| H | 0.83438  | -0.13772 | 4.3612  |
| H | 0.01518  | 1.17239  | 6.32465 |
| C | -0.72571 | -1.18661 | 2.36997 |
| C | 0.65359  | -1.71502 | 2.12255 |
| H | 1.30768  | -0.91502 | 1.75597 |
| H | 1.08469  | -2.10654 | 3.04613 |

|    |          |          |          |
|----|----------|----------|----------|
| H  | 0.63238  | -2.49849 | 1.36551  |
| N  | -1.69047 | -1.26399 | 1.49893  |
| O  | -1.3592  | -1.85808 | 0.28808  |
| H  | -2.15861 | -2.35529 | 0.04106  |
| Ru | -3.62942 | -0.55586 | 1.91559  |
| C  | -4.4134  | 0.06255  | -0.18894 |
| C  | -3.77421 | 1.24984  | 0.31762  |
| C  | -4.23804 | 1.73264  | 1.55813  |
| C  | -5.2392  | 1.03707  | 2.28869  |
| C  | -5.9182  | -0.09281 | 1.75764  |
| C  | -5.49107 | -0.55085 | 0.47987  |
| H  | -4.08585 | -0.35273 | -1.1334  |
| H  | -3.78503 | 2.60686  | 2.00812  |
| H  | -5.51858 | 1.4015   | 3.27193  |
| H  | -5.96746 | -1.42168 | 0.04187  |
| C  | -7.04533 | -0.75564 | 2.5022   |
| C  | -3.64884 | -2.54291 | 2.50597  |
| C  | -3.71018 | -3.84188 | 1.89975  |
| C  | -4.02324 | -4.0136  | 0.53281  |
| C  | -3.42868 | -4.9912  | 2.67595  |
| C  | -4.06058 | -5.28483 | -0.0356  |
| H  | -4.27009 | -3.14392 | -0.0706  |
| C  | -3.47047 | -6.25579 | 2.10134  |
| H  | -3.18011 | -4.8721  | 3.72563  |
| C  | -3.78358 | -6.40903 | 0.74566  |
| H  | -4.30952 | -5.40034 | -1.08602 |
| H  | -3.25479 | -7.12859 | 2.70988  |
| H  | -3.81101 | -7.39935 | 0.30247  |
| C  | -3.60586 | -1.95171 | 3.68461  |
| C  | -4.23995 | -2.13475 | 4.90825  |
| C  | -4.79429 | -2.2659  | 5.98898  |
| C  | -5.4452  | -2.41505 | 7.24345  |
| C  | -5.3467  | -1.39784 | 8.21729  |
| C  | -6.19719 | -3.57532 | 7.52464  |
| C  | -5.99127 | -1.54533 | 9.44141  |
| H  | -4.77774 | -0.49943 | 7.99984  |
| C  | -6.82805 | -3.71375 | 8.75659  |
| H  | -6.2735  | -4.35586 | 6.77457  |
| C  | -6.72822 | -2.70111 | 9.71528  |
| H  | -5.91665 | -0.75806 | 10.185   |
| H  | -7.40127 | -4.61057 | 8.97005  |
| H  | -7.22509 | -2.81236 | 10.67416 |
| C  | -2.72337 | 2.01795  | -0.49991 |
| C  | -2.0877  | 1.14058  | -1.598   |

|   |          |          |          |
|---|----------|----------|----------|
| C | -3.46486 | 3.20391  | -1.17154 |
| H | -1.62691 | 0.23824  | -1.18503 |
| H | -2.81202 | 0.84752  | -2.36468 |
| H | -1.30738 | 1.71243  | -2.10755 |
| H | -3.89785 | 3.88186  | -0.42954 |
| H | -2.76279 | 3.778    | -1.78398 |
| H | -4.27109 | 2.85367  | -1.8242  |
| H | -7.1504  | -1.80383 | 2.2129   |
| H | -6.88571 | -0.71257 | 3.5821   |
| H | -7.99139 | -0.24809 | 2.28065  |
| C | -2.55504 | 1.75257  | 6.95227  |
| O | -3.70245 | 1.93961  | 7.3548   |
| O | -1.54326 | 2.33975  | 7.63996  |
| H | -1.89052 | 2.84953  | 8.39009  |
| H | -1.94349 | 2.39698  | 0.12701  |

### TS2-m-COOH

Sum of electronic and thermal Free Energies = -1726.521781

Sum of electronic and thermal Enthalpies = -1726.409460

Imaginary frequency= -336.8908

|    |          |          |          |
|----|----------|----------|----------|
| C  | -2.99488 | 0.38139  | 4.96296  |
| C  | -2.58031 | -0.39718 | 3.85919  |
| C  | -1.17144 | -0.57313 | 3.67604  |
| C  | -0.2559  | -0.04517 | 4.59054  |
| C  | -0.69836 | 0.71496  | 5.67298  |
| C  | -2.07716 | 0.94025  | 5.84054  |
| H  | -4.05429 | 0.51196  | 5.1552   |
| H  | 0.81295  | -0.18077 | 4.46212  |
| C  | -0.75136 | -1.2349  | 2.45198  |
| C  | 0.62315  | -1.77723 | 2.20917  |
| H  | 1.27803  | -0.99028 | 1.81702  |
| H  | 1.05949  | -2.14555 | 3.13958  |
| H  | 0.59152  | -2.57858 | 1.47126  |
| N  | -1.70974 | -1.29272 | 1.5732   |
| O  | -1.38056 | -1.88134 | 0.35538  |
| H  | -2.16067 | -2.42034 | 0.13348  |
| Ru | -3.63546 | -0.55223 | 1.98147  |
| C  | -4.34573 | 0.12327  | -0.12766 |
| C  | -3.69342 | 1.28472  | 0.42055  |
| C  | -4.18286 | 1.75561  | 1.65546  |
| C  | -5.21981 | 1.06965  | 2.34431  |
| C  | -5.90847 | -0.03376 | 1.77288  |
| C  | -5.45571 | -0.47713 | 0.49857  |
| H  | -3.99888 | -0.28455 | -1.06831 |
| H  | -3.72143 | 2.60948  | 2.13555  |

|   |          |          |          |                                               |              |          |          |
|---|----------|----------|----------|-----------------------------------------------|--------------|----------|----------|
| H | -5.51761 | 1.42132  | 3.3265   | O                                             | -0.2089      | 1.99091  | 7.60547  |
| H | -5.93985 | -1.32735 | 0.02958  | H                                             | 0.53433      | 2.30579  | 8.147    |
| C | -7.07361 | -0.68301 | 2.46962  | H                                             | -1.79603     | 2.32776  | 0.30986  |
| C | -3.70762 | -2.53776 | 2.54846  | <b>TS2-p-CH<sub>3</sub></b>                   |              |          |          |
| C | -3.79571 | -3.83125 | 1.92912  | Sum of electronic and thermal Free Energies = | -1577.259102 |          |          |
| C | -4.09643 | -3.98312 | 0.55742  | Sum of electronic and thermal Enthalpies =    | -1577.259102 |          |          |
| C | -3.5475  | -4.99339 | 2.69719  | Imaginary frequency=                          | -326.3347    |          |          |
| C | -4.15329 | -5.24826 | -0.02392 | C                                             | -3.09501     | 0.53408  | 4.81611  |
| H | -4.31485 | -3.10221 | -0.04051 | C                                             | -2.64877     | -0.27827 | 3.75411  |
| C | -3.6083  | -6.2515  | 2.11001  | C                                             | -1.24123     | -0.43219 | 3.58587  |
| H | -3.30858 | -4.88919 | 3.75064  | C                                             | -0.35007     | 0.16467  | 4.49222  |
| C | -3.90865 | -6.38534 | 0.74941  | C                                             | -0.82778     | 0.95472  | 5.52708  |
| H | -4.39144 | -5.34847 | -1.07842 | C                                             | -2.21181     | 1.16584  | 5.69145  |
| H | -3.41703 | -7.13433 | 2.71241  | H                                             | -4.16178     | 0.63971  | 4.98866  |
| H | -3.95067 | -7.37072 | 0.29621  | H                                             | 0.72015      | 0.03674  | 4.36169  |
| C | -3.64137 | -1.97914 | 3.74132  | H                                             | -0.129       | 1.42243  | 6.21459  |
| C | -4.23999 | -2.20776 | 4.97424  | C                                             | -0.79753     | -1.1443  | 2.40204  |
| C | -4.76112 | -2.41409 | 6.05947  | C                                             | 0.58897      | -1.67464 | 2.20045  |
| C | -5.36563 | -2.66263 | 7.32182  | H                                             | 1.23586      | -0.89758 | 1.77694  |
| C | -4.85566 | -2.05051 | 8.48643  | H                                             | 1.01956      | -1.99114 | 3.15214  |
| C | -6.48085 | -3.52086 | 7.42461  | H                                             | 0.57929      | -2.51191 | 1.50305  |
| C | -5.45327 | -2.29038 | 9.71958  | N                                             | -1.7443      | -1.26946 | 1.51729  |
| H | -3.99339 | -1.3962  | 8.40807  | O                                             | -1.38993     | -1.92516 | 0.34036  |
| C | -7.06752 | -3.75691 | 8.66372  | H                                             | -2.16656     | -2.47414 | 0.13289  |
| H | -6.87193 | -3.99383 | 6.52956  | Ru                                            | -3.68399     | -0.53509 | 1.86479  |
| C | -6.55772 | -3.1425  | 9.81132  | C                                             | -4.3774      | 0.05375  | -0.27789 |
| H | -5.05638 | -1.81648 | 10.61199 | C                                             | -3.74933     | 1.23711  | 0.24478  |
| H | -7.92415 | -4.41975 | 8.7367   | C                                             | -4.24672     | 1.74672  | 1.45907  |
| H | -7.01937 | -3.32906 | 10.77609 | C                                             | -5.28736     | 1.07661  | 2.15905  |
| C | -2.59363 | 2.0405   | -0.34299 | C                                             | -5.95523     | -0.05376 | 1.6163   |
| C | -2.00606 | 1.20017  | -1.49499 | C                                             | -5.48309     | -0.53995 | 0.36232  |
| C | -3.25391 | 3.31314  | -0.93571 | H                                             | -4.01158     | -0.37592 | -1.20301 |
| H | -1.60168 | 0.24676  | -1.14128 | H                                             | -3.77907     | 2.61662  | 1.90765  |
| H | -2.74374 | 1.00225  | -2.2793  | H                                             | -5.59874     | 1.45451  | 3.12693  |
| H | -1.18962 | 1.75568  | -1.964   | H                                             | -5.9531      | -1.41307 | -0.07764 |
| H | -3.63346 | 3.97412  | -0.14962 | C                                             | -7.11912     | -0.6983  | 2.31984  |
| H | -2.51659 | 3.87332  | -1.51925 | C                                             | -3.7475      | -2.49561 | 2.51597  |
| H | -4.08698 | 3.06082  | -1.60035 | C                                             | -3.84402     | -3.81156 | 1.94257  |
| H | -7.19163 | -1.72418 | 2.15937  | C                                             | -4.12336     | -4.00912 | 0.57266  |
| H | -6.9484  | -0.66096 | 3.55521  | C                                             | -3.62858     | -4.94912 | 2.75541  |
| H | -8.00153 | -0.15167 | 2.22633  | C                                             | -4.19173     | -5.29345 | 0.03565  |
| H | -2.41943 | 1.54525  | 6.67297  | H                                             | -4.31548     | -3.14705 | -0.06057 |
| C | 0.32899  | 1.26772  | 6.5976   | C                                             | -3.70082     | -6.22664 | 2.21278  |
| O | 1.52395  | 1.09506  | 6.46938  | H                                             | -3.40663     | -4.81114 | 3.80874  |

|                                                            |          |          |          |    |          |          |          |
|------------------------------------------------------------|----------|----------|----------|----|----------|----------|----------|
| C                                                          | -3.98042 | -6.40568 | 0.85294  | C  | -2.14586 | 0.97205  | 5.81326  |
| H                                                          | -4.41299 | -5.42713 | -1.01893 | H  | -4.11741 | 0.52463  | 5.11856  |
| H                                                          | -3.5352  | -7.08987 | 2.85024  | H  | 0.75145  | -0.12547 | 4.4436   |
| H                                                          | -4.03218 | -7.40604 | 0.43505  | C  | -0.7805  | -1.20805 | 2.45964  |
| C                                                          | -3.68143 | -1.90035 | 3.68838  | C  | 0.59924  | -1.74952 | 2.24383  |
| C                                                          | -4.24234 | -2.10831 | 4.94198  | H  | 1.26636  | -0.95705 | 1.88452  |
| C                                                          | -4.73442 | -2.31171 | 6.04124  | H  | 1.00799  | -2.13507 | 3.17996  |
| C                                                          | -5.31109 | -2.56579 | 7.31577  | H  | 0.58725  | -2.53889 | 1.49281  |
| C                                                          | -4.87716 | -1.84995 | 8.45171  | N  | -1.72654 | -1.28858 | 1.57025  |
| C                                                          | -6.32456 | -3.537   | 7.45953  | O  | -1.37854 | -1.90556 | 0.37138  |
| C                                                          | -5.44928 | -2.09845 | 9.69536  | H  | -2.16799 | -2.42384 | 0.13554  |
| H                                                          | -4.09259 | -1.10807 | 8.34339  | Ru | -3.65842 | -0.54347 | 1.93908  |
| C                                                          | -6.88486 | -3.7821  | 8.70924  | C  | -4.36248 | 0.11744  | -0.18062 |
| H                                                          | -6.65806 | -4.08969 | 6.58704  | C  | -3.70945 | 1.27591  | 0.36577  |
| C                                                          | -6.45182 | -3.06365 | 9.8276   | C  | -4.18392 | 1.76187  | 1.59887  |
| H                                                          | -5.11133 | -1.54298 | 10.56497 | C  | -5.22782 | 1.09079  | 2.29287  |
| H                                                          | -7.66204 | -4.533   | 8.81283  | C  | -5.92191 | -0.0125  | 1.7278   |
| H                                                          | -6.89324 | -3.25685 | 10.80055 | C  | -5.47068 | -0.47441 | 0.45731  |
| C                                                          | -2.65025 | 1.98024  | -0.50121 | H  | -4.01584 | -0.29228 | -1.12202 |
| C                                                          | -1.83129 | 1.10874  | -1.4637  | H  | -3.69802 | 2.61331  | 2.06324  |
| C                                                          | -3.27203 | 3.18274  | -1.24763 | H  | -5.52258 | 1.44801  | 3.27378  |
| H                                                          | -1.44118 | 0.2095   | -0.98023 | H  | -5.95876 | -1.32927 | 0.00131  |
| H                                                          | -2.42294 | 0.80426  | -2.33445 | C  | -7.08996 | -0.65376 | 2.42742  |
| H                                                          | -0.98434 | 1.68598  | -1.84472 | C  | -3.76041 | -2.52673 | 2.51474  |
| H                                                          | -3.80058 | 3.85651  | -0.56696 | C  | -3.87952 | -3.81669 | 1.88745  |
| H                                                          | -2.48747 | 3.75654  | -1.74946 | C  | -4.14653 | -3.95479 | 0.50794  |
| H                                                          | -3.98209 | 2.84637  | -2.01077 | C  | -3.69901 | -4.98967 | 2.65711  |
| H                                                          | -7.15673 | -1.77178 | 2.12103  | C  | -4.23568 | -5.21547 | -0.07985 |
| H                                                          | -7.06026 | -0.55274 | 3.40067  | H  | -4.31254 | -3.0654  | -0.09416 |
| H                                                          | -8.06074 | -0.2587  | 1.97188  | C  | -3.79205 | -6.24324 | 2.06414  |
| C                                                          | -2.71743 | 2.03746  | 6.81499  | H  | -3.48734 | -4.89799 | 3.71757  |
| H                                                          | -3.80094 | 2.17227  | 6.76708  | C  | -4.05845 | -6.36316 | 0.69525  |
| H                                                          | -2.4758  | 1.59823  | 7.78995  | H  | -4.44678 | -5.30287 | -1.14134 |
| H                                                          | -2.24999 | 3.02771  | 6.7886   | H  | -3.65332 | -7.13397 | 2.66932  |
| H                                                          | -1.9698  | 2.37765  | 0.26235  | H  | -4.12677 | -7.34504 | 0.23779  |
| <b>TS2-m-CH<sub>3</sub></b>                                |          |          |          | C  | -3.68493 | -1.98334 | 3.71028  |
| Sum of electronic and thermal Free Energies = -1577.259102 |          |          |          | C  | -4.23693 | -2.224   | 4.96105  |
| Sum of electronic and thermal Enthalpies = -1577.259102    |          |          |          | C  | -4.71722 | -2.44505 | 6.06212  |
| Imaginary frequency= -326.1727                             |          |          |          | C  | -5.26644 | -2.70951 | 7.34634  |
| C                                                          | -3.05561 | 0.4016   | 4.93224  | C  | -4.73376 | -2.07701 | 8.48956  |
| C                                                          | -2.62626 | -0.3726  | 3.83605  | C  | -6.34645 | -3.6051  | 7.49424  |
| C                                                          | -1.21876 | -0.53258 | 3.67059  | C  | -5.27415 | -2.33373 | 9.74548  |
| C                                                          | -0.31555 | 0.01428  | 4.5934   | H  | -3.8989  | -1.3931  | 8.37574  |
| C                                                          | -0.75851 | 0.77394  | 5.67756  | C  | -6.87535 | -3.8585  | 8.75588  |



|                                                            |          |          |          |    |          |          |          |
|------------------------------------------------------------|----------|----------|----------|----|----------|----------|----------|
| H                                                          | -6.75594 | -4.0933  | 6.6159   | Ru | -3.66916 | -0.55313 | 1.88981  |
| C                                                          | -6.34328 | -3.22396 | 9.88194  | C  | -4.38387 | 0.05119  | -0.23447 |
| H                                                          | -4.85983 | -1.8435  | 10.62096 | C  | -3.75913 | 1.24191  | 0.28245  |
| H                                                          | -7.70461 | -4.55084 | 8.86311  | C  | -4.25948 | 1.73492  | 1.50413  |
| H                                                          | -6.75998 | -3.42406 | 10.86429 | C  | -5.28157 | 1.04414  | 2.21046  |
| C                                                          | -2.60947 | 2.02237  | -0.37526 | C  | -5.94811 | -0.08706 | 1.66732  |
| C                                                          | -1.80337 | 1.1609   | -1.35785 | C  | -5.48256 | -0.55563 | 0.40672  |
| C                                                          | -3.22797 | 3.24135  | -1.09732 | H  | -4.02594 | -0.37501 | -1.16276 |
| H                                                          | -1.41709 | 0.25108  | -0.89171 | H  | -3.817   | 2.60979  | 1.96325  |
| H                                                          | -2.40275 | 0.87515  | -2.22986 | H  | -5.58424 | 1.41305  | 3.18488  |
| H                                                          | -0.95444 | 1.73794  | -1.73483 | H  | -5.94572 | -1.42997 | -0.03838 |
| H                                                          | -3.74689 | 3.90744  | -0.40185 | C  | -7.09811 | -0.74436 | 2.38159  |
| H                                                          | -2.44287 | 3.81754  | -1.59526 | C  | -3.70017 | -2.52842 | 2.48976  |
| H                                                          | -3.94561 | 2.92242  | -1.86072 | C  | -3.76007 | -3.83231 | 1.88933  |
| H                                                          | -7.16057 | -1.71723 | 2.18671  | C  | -4.0293  | -4.00725 | 0.51369  |
| H                                                          | -7.00678 | -0.55343 | 3.51211  | C  | -3.51697 | -4.98148 | 2.67822  |
| H                                                          | -8.02571 | -0.17526 | 2.11566  | C  | -4.06161 | -5.281   | -0.05086 |
| H                                                          | -2.51595 | 1.57583  | 6.63815  | H  | -4.24311 | -3.13704 | -0.10116 |
| C                                                          | 0.21168  | 1.34755  | 6.67935  | C  | -3.55343 | -6.24817 | 2.10776  |
| H                                                          | 0.3998   | 0.63665  | 7.4932   | H  | -3.30218 | -4.86037 | 3.73511  |
| H                                                          | 1.17686  | 1.57615  | 6.21898  | C  | -3.82338 | -6.40472 | 0.74311  |
| H                                                          | -0.17599 | 2.26432  | 7.13209  | H  | -4.276   | -5.39781 | -1.10882 |
| H                                                          | -1.9209  | 2.40275  | 0.38986  | H  | -3.36723 | -7.12048 | 2.72682  |
| <b>TS2-p-OH</b>                                            |          |          |          | H  | -3.84696 | -7.39675 | 0.30341  |
| Sum of electronic and thermal Free Energies = -1613.180071 |          |          |          | C  | -3.66468 | -1.94651 | 3.67333  |
| Sum of electronic and thermal Enthalpies = -1613.072308    |          |          |          | C  | -4.27393 | -2.16804 | 4.90351  |
| Imaginary frequency= -329.3975                             |          |          |          | C  | -4.80062 | -2.3328  | 5.99271  |
| C                                                          | -3.10392 | 0.42002  | 4.87289  | C  | -5.40048 | -2.50127 | 7.27025  |
| C                                                          | -2.64709 | -0.35408 | 3.79453  | C  | -5.13136 | -1.57594 | 8.30174  |
| C                                                          | -1.23181 | -0.50513 | 3.63223  | C  | -6.26924 | -3.58336 | 7.52233  |
| C                                                          | -0.35001 | 0.04681  | 4.57419  | C  | -5.72361 | -1.73376 | 9.55067  |
| C                                                          | -0.82595 | 0.78453  | 5.64816  | H  | -4.46493 | -0.74122 | 8.10729  |
| C                                                          | -2.2116  | 0.98375  | 5.78572  | C  | -6.84859 | -3.73484 | 8.77826  |
| H                                                          | -4.16379 | 0.53598  | 5.06706  | H  | -6.4772  | -4.29451 | 6.72944  |
| H                                                          | 0.72113  | -0.07844 | 4.45034  | C  | -6.57957 | -2.8121  | 9.79307  |
| H                                                          | -0.13602 | 1.20787  | 6.37312  | H  | -5.51595 | -1.01698 | 10.33922 |
| C                                                          | -0.77886 | -1.15996 | 2.42371  | H  | -7.51336 | -4.57214 | 8.96681  |
| C                                                          | 0.61312  | -1.67118 | 2.2062   | H  | -7.03605 | -2.93297 | 10.77069 |
| H                                                          | 1.26063  | -0.86764 | 1.83607  | C  | -2.67816 | 2.00046  | -0.50435 |
| H                                                          | 1.03534  | -2.04221 | 3.14206  | C  | -2.03294 | 1.1234   | -1.59692 |
| H                                                          | 0.61477  | -2.46576 | 1.46051  | C  | -3.38178 | 3.20627  | -1.18056 |
| N                                                          | -1.71948 | -1.25246 | 1.5255   | H  | -1.59911 | 0.20829  | -1.18323 |
| O                                                          | -1.35514 | -1.85535 | 0.32198  | H  | -2.74569 | 0.85227  | -2.38241 |
| H                                                          | -2.1051  | -2.44083 | 0.11438  | H  | -1.2309  | 1.68652  | -2.08218 |

|                                                            |          |          |          |   |          |          |          |
|------------------------------------------------------------|----------|----------|----------|---|----------|----------|----------|
| H                                                          | -3.81893 | 3.88532  | -0.44192 | C | -3.67767 | -4.98978 | 2.66831  |
| H                                                          | -2.6563  | 3.77309  | -1.77229 | C | -4.18692 | -5.20784 | -0.07419 |
| H                                                          | -4.17984 | 2.87706  | -1.85396 | H | -4.29622 | -3.05913 | -0.07742 |
| H                                                          | -7.18432 | -1.79861 | 2.10796  | C | -3.74576 | -6.24119 | 2.06733  |
| H                                                          | -6.97847 | -0.68147 | 3.4658   | H | -3.47572 | -4.90143 | 3.73104  |
| H                                                          | -8.0398  | -0.24947 | 2.11684  | C | -3.99829 | -6.35744 | 0.69544  |
| O                                                          | -2.75087 | 1.69617  | 6.80818  | H | -4.38794 | -5.29184 | -1.13801 |
| H                                                          | -2.05158 | 2.04179  | 7.37963  | H | -3.59755 | -7.13308 | 2.66883  |
| H                                                          | -1.90622 | 2.35851  | 0.14434  | H | -4.04708 | -7.33754 | 0.23174  |
| <b>TS2-m-OH</b>                                            |          |          |          | C | -3.70635 | -1.99079 | 3.73832  |
| Sum of electronic and thermal Free Energies = -1613.178183 |          |          |          | C | -4.26501 | -2.2255  | 4.98654  |
| Sum of electronic and thermal Enthalpies = -1613.069926    |          |          |          | C | -4.75435 | -2.44195 | 6.08476  |
| Imaginary frequency= -319.0430                             |          |          |          | C | -5.31747 | -2.70462 | 7.36359  |
| C                                                          | -3.05779 | 0.39393  | 4.96601  | C | -4.73898 | -2.14589 | 8.52299  |
| C                                                          | -2.62853 | -0.3773  | 3.86735  | C | -6.4581  | -3.52526 | 7.48983  |
| C                                                          | -1.22007 | -0.56129 | 3.72075  | C | -5.29333 | -2.40073 | 9.7733   |
| C                                                          | -0.31292 | -0.04437 | 4.65025  | H | -3.85698 | -1.52104 | 8.42589  |
| C                                                          | -0.77741 | 0.7136   | 5.72738  | C | -7.00174 | -3.77682 | 8.74567  |
| C                                                          | -2.15748 | 0.94416  | 5.86845  | H | -6.90287 | -3.95734 | 6.59917  |
| H                                                          | -4.11938 | 0.53207  | 5.1418   | C | -6.42343 | -3.21549 | 9.88788  |
| H                                                          | 0.75654  | -0.1844  | 4.53734  | H | -4.84264 | -1.96839 | 10.66141 |
| C                                                          | -0.7788  | -1.23663 | 2.50794  | H | -7.87831 | -4.41086 | 8.83577  |
| C                                                          | 0.59677  | -1.7912  | 2.30195  | H | -6.85143 | -3.41425 | 10.8657  |
| H                                                          | 1.27733  | -1.00138 | 1.95973  | C | -2.55952 | 2.04875  | -0.35006 |
| H                                                          | 0.99081  | -2.1892  | 3.23885  | C | -1.90424 | 1.17985  | -1.44354 |
| H                                                          | 0.58521  | -2.57262 | 1.54306  | C | -3.22977 | 3.27648  | -1.02082 |
| N                                                          | -1.71834 | -1.29711 | 1.61043  | H | -1.50105 | 0.24696  | -1.03873 |
| O                                                          | -1.36632 | -1.90169 | 0.40744  | H | -2.60108 | 0.94024  | -2.25282 |
| H                                                          | -2.15571 | -2.417   | 0.16381  | H | -1.07756 | 1.73472  | -1.89545 |
| Ru                                                         | -3.6432  | -0.5414  | 1.96684  | H | -3.66611 | 3.95312  | -0.27961 |
| C                                                          | -4.30847 | 0.12945  | -0.15748 | H | -2.4848  | 3.83783  | -1.59298 |
| C                                                          | -3.66867 | 1.29366  | 0.40022  | H | -4.02286 | 2.97152  | -1.71112 |
| C                                                          | -4.18188 | 1.76636  | 1.62418  | H | -7.10085 | -1.75442 | 2.19124  |
| C                                                          | -5.23441 | 1.08239  | 2.29426  | H | -7.06769 | -0.52378 | 3.46469  |
| C                                                          | -5.90825 | -0.02309 | 1.71452  | H | -8.02188 | -0.25562 | 1.99879  |
| C                                                          | -5.42612 | -0.47318 | 0.45135  | H | -2.5233  | 1.54231  | 6.70021  |
| H                                                          | -3.94356 | -0.28095 | -1.09031 | O | 0.14799  | 1.20174  | 6.5882   |
| H                                                          | -3.73004 | 2.62062  | 2.11218  | H | -0.27778 | 1.72317  | 7.28185  |
| H                                                          | -5.55318 | 1.43795  | 3.26846  | H | -1.79578 | 2.38451  | 0.31991  |
| H                                                          | -5.89811 | -1.32747 | -0.02229 |   |          |          |          |
| C                                                          | -7.0861  | -0.67855 | 2.38337  |   |          |          |          |
| C                                                          | -3.76889 | -2.52717 | 2.54069  |   |          |          |          |
| C                                                          | -3.86895 | -3.81473 | 1.90406  |   |          |          |          |
| C                                                          | -4.12171 | -3.94913 | 0.52147  |   |          |          |          |
